# Supplementary material for: Predicting Absolute Rate Constants for Huisgen Reactions of Unsaturated Iminium Ions with Diazoalkanes
Source: PubMed Central journal article supplement (PMC7383640; doi:10.1002/anie.202003029), 2020-05-11
Supplement: ANIE-59-12527-s001.pdf [file ANIE-59-12527-s001.pdf]

## Supporting Information

### **Predicting Absolute Rate Constants for Huisgen Reactions of Unsaturated Iminium Ions with Diazoalkanes**

*Jingjing Zhang<sup>+</sup>, Quan Chen<sup>+</sup>, Robert J. Mayer<sup>+</sup>, Jin-Dong Yang, Armin R. Ofial, Jin-Pei Cheng, and Herbert Mayr\**

anie\_202003029\_sm\_miscellaneous\_information.pdf  
anie\_202003029\_sm\_miscellaneous\_information.zip

## **Author Contributions**

R.J.M. performed all quantum chemical calculations.

## Supporting Information

### Content

|                                                                                                             |     |
|-------------------------------------------------------------------------------------------------------------|-----|
| 1. General Information .....                                                                                | S2  |
| 2. Synthesis of Iminium Hexafluorophosphates <b>2</b> .....                                                 | S3  |
| 3. Reactions of Iminium Hexafluorophosphates with Diphenyldiazomethane ( <b>4</b> ) .....                   | S5  |
| 4. Cyclopropanation of Iminium Hexafluorophosphates <b>1</b> with Diphenyldiazomethane ( <b>4</b> ) .....   | S5  |
| 5. Cyclopropanation of Iminium Hexafluorophosphates <b>2</b> with Diphenyldiazomethane ( <b>4</b> ) .....   | S7  |
| 6. Reactions of Iminium Hexafluorophosphates <b>1</b> with Aryldiazomethanes <b>6</b> .....                 | S11 |
| 7. Oxidation of <b>7b</b> .....                                                                             | S14 |
| 8. Attempts to Catalyze the Reactions of Cinnamaldehyde with Aryldiazomethanes by MacMillan Catalysts ..... | S14 |
| 9. Kinetics of the Reactions of Iminium Salts with Aryldiazomethanes .....                                  | S15 |
| 10. Computational Details .....                                                                             | S19 |
| 11. Copies of NMR Spectra .....                                                                             | S34 |
| 12. Crystallographic Data .....                                                                             | S49 |
| 13. References .....                                                                                        | S52 |

## 1. General Information

**Chemicals:** The iminium hexafluorophosphates **1-3** were prepared by following reported methods through condensation of  $\alpha,\beta$ -unsaturated aldehydes with imidazolidinones.<sup>[S 1]</sup> Aryldiazomethanes **4** and **6(a-c)** were synthesized as described in the literature.<sup>[S 2]</sup> Dichloromethane and acetonitrile were purchased from J&K Chemical (99.9 %, extra dry, water < 30 ppm, J&K seal) and used without further purification. Other solvents were distilled by standard solvent treatment methods. Unless otherwise mentioned, all chemicals were purchased from commercial sources. Flash chromatography was performed to purify the products. Reaction temperature refers to temperature of an aluminum heating block or a silicon oil bath, which was controlled by an electronic temperature modulator from IKA.

**Analysis:** NMR spectra were acquired on NMR spectrometers with 400 or 600 MHz for  $^1\text{H}$  NMR and 101 MHz for  $^{13}\text{C}$  NMR. Chemical shifts ( $\delta$ ) were reported in ppm relative to the residual solvent signal. Data for  $^1\text{H}$  NMR spectra were reported as follows: chemical shift (multiplicity, coupling constants, number of hydrogens). Abbreviations were as follows: s (singlet), d (doublet), t (triplet), q (quartet), m (multiplet), br (broad). The aromatic NMR signals of **7a**, **7b**, and **8** were assigned by two-dimensional NMR spectroscopy (HSQC, HMBC, COSY). High-resolution mass spectral data were performed on a Thermo Scientific Q Exactive (positive mode) at the Mass Spectrometry Facility. Enantiomeric ratios (er) were determined by analytical liquid chromatography (HPLC) analysis on a Shimadzu chromatograph (Daicel chiral columns Chiralpak IA, IC, ID, IE, IF (4.6  $\times$  250 mm)).

**Kinetics:** The rates of the reactions were determined spectrophotometrically using stopped-flow (Applied Photophysics SX.18MV-R and Hi-Tech SF-61DX2) and diode array spectrometer systems (J&M TIDAS DAD 2062) by following the disappearance of the iminium ions **1-3** in  $\text{CH}_2\text{Cl}_2$ . The temperature of the solutions was kept constant ( $20.0 \pm 0.1$  °C) by using a circulating bath thermostat. All kinetic investigations were performed with a high excess of the nucleophiles **4** and **6** over the iminium ions **1-3** to achieve first-order kinetics (for example,  $[\mathbf{4}]/[\mathbf{1}] > 10$ ). Rate constants  $k_{\text{obs}}$  ( $\text{s}^{-1}$ ) were obtained by fitting the single exponential decay  $A_t = A_0 \exp(-k_{\text{obs}}t) + C$  to the observed time-dependent absorbance. Second-order rate constants  $k_2$  ( $\text{M}^{-1} \text{s}^{-1}$ ) were derived from the slopes of the linear correlations of  $k_{\text{obs}}$  ( $\text{s}^{-1}$ ) with concentrations of the aryldiazomethanes **4** and **6**.

## 2. Synthesis of Iminium Hexafluorophosphates 2

Solutions of the corresponding cinnamaldehydes (15 mmol in 4 mL of CH<sub>2</sub>Cl<sub>2</sub>) were added dropwise at ambient temperature to solutions of (2*S*,5*S*)-5-benzyl-2-(*tert*-butyl)-2,3-dimethylimidazolidin-4-one·HPF<sub>6</sub> (3.90 g, 10.0 mmol) in methanol (15 mL). The mixtures were stirred for 2 h, and the precipitates were isolated by filtration, washed with cold methanol (10.0 mL), diethylether (20 mL), and dried in the vacuum for 12 h.

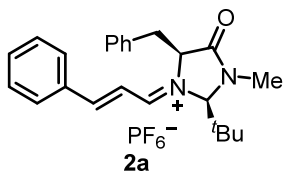

**2a:** Yield: 91%. <sup>1</sup>H NMR (400 MHz, CD<sub>3</sub>CN) δ 8.47 (d, *J* = 10.9 Hz, 1 H), 8.03 (d, *J* = 15.0 Hz, 1 H), 7.73–7.65 (m, 1 H), 7.59–7.41 (m, 8 H), 7.35–7.25 (m, 1 H), 6.27 (dd, *J* = 15.0, 10.8 Hz, 1 H), 5.26 (s, 1 H), 4.89 (dd, *J* = 8.9, 4.8 Hz, 1 H), 3.58 (dd, *J* = 14.9, 4.8 Hz, 1 H), 3.38–3.17 (m, 1 H), 3.12 (s, 3 H), 1.27 (s, 9 H). <sup>13</sup>C NMR (101 MHz, CD<sub>3</sub>CN) δ 171.9, 167.1, 166.3, 136.1, 135.3, 133.0, 131.3, 129.8, 129.5, 129.5, 128.2, 116.8, 90.3, 64.7, 37.5, 37.3, 31.6, 25.9. **HRMS (ESI)** calcd for C<sub>24</sub>H<sub>29</sub>N<sub>2</sub>O<sup>+</sup> (M<sup>+</sup>) 361.2274, found 361.2265.

NMR spectroscopic data are in agreement with those in the literature.<sup>[S1c,d]</sup>

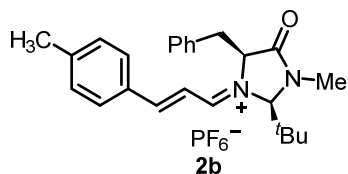

**2b:** Yield: 87%. <sup>1</sup>H NMR (400 MHz, CD<sub>3</sub>CN) δ 8.42 (d, *J* = 10.9 Hz, 1 H), 8.00 (d, *J* = 14.9 Hz, 1 H), 7.50–7.46 (m, 4 H), 7.42–7.35 (m, 4 H), 7.30 (t, *J* = 7.2 Hz, 1 H), 6.21 (dd, *J* = 14.9, 10.9 Hz, 1 H), 5.23 (s, 1 H), 4.84 (dd, *J* = 8.8, 4.8 Hz, 1 H), 3.57 (dd, *J* = 14.9, 4.8 Hz, 1 H), 3.26 (dd, *J* = 14.9, 8.9 Hz, 1 H), 3.11 (s, 3 H), 2.46 (s, 3 H), 1.26 (s, 9 H). <sup>13</sup>C NMR (101 MHz, CD<sub>3</sub>CN) δ 171.5, 167.2, 166.5, 147.8, 136.2, 131.6, 130.6, 130.3, 129.8, 129.4, 128.2, 115.7, 90.1, 64.6, 37.6, 37.3, 31.6, 25.8, 21.2. **HRMS (ESI)** calcd for C<sub>25</sub>H<sub>31</sub>N<sub>2</sub>O<sup>+</sup> (M<sup>+</sup>) 375.2431, found 375.2425.

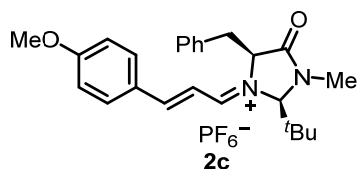

**2c:** Yield: 92%. <sup>1</sup>H NMR (400 MHz, CD<sub>3</sub>CN) δ 8.32 (d, *J* = 11.1 Hz, 1 H), 7.95 (d, *J* = 14.7 Hz, 1 H), 7.55–7.42 (m, 6 H), 7.32 (t, *J* = 7.2 Hz, 1 H), 7.08 (d, *J* = 8.9 Hz, 2 H), 6.06 (dd, *J* = 14.7, 11.0 Hz, 1 H), 5.20 (s, 1 H), 4.79 (dd, *J* = 8.9, 4.7 Hz, 1 H), 3.95 (s, 3 H), 3.55 (dd, *J* = 14.9, 4.7 Hz, 1 H), 3.24 (dd, *J* = 14.9, 9.0 Hz, 1 H), 3.10 (s, 3 H), 1.25 (s, 9 H). <sup>13</sup>C NMR (101 MHz, CD<sub>3</sub>CN) δ 170.6, 167.5, 166.3, 166.1, 136.4, 134.5, 129.8, 129.4, 128.1, 126.1, 115.4, 113.8, 89.9, 64.4, 56.0, 37.7, 37.2, 31.6, 25.8. **HRMS (ESI)** calcd for C<sub>25</sub>H<sub>31</sub>N<sub>2</sub>O<sub>2</sub><sup>+</sup> (M<sup>+</sup>) 391.2380, found 391.2368.

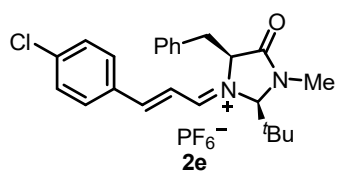

**2e:** Yield: 90%.  $^1\text{H NMR}$  (400 MHz,  $\text{CD}_3\text{CN}$ )  $\delta$  8.46 (d,  $J = 10.8$  Hz, 1 H), 7.97 (d,  $J = 15.0$  Hz, 1 H), 7.57 (d,  $J = 8.6$  Hz, 2 H), 7.49–7.43 (m, 6 H), 7.29 (t,  $J = 7.2$  Hz, 1 H), 6.20 (dd,  $J = 15.0, 10.8$  Hz, 1 H), 5.26 (s, 1 H), 4.88 (dd,  $J = 9.1, 4.7$  Hz, 1 H), 3.58 (dd,  $J = 14.9, 4.7$  Hz, 1 H), 3.26 (dd,  $J = 14.9, 9.2$  Hz, 1 H), 3.11 (d,  $J = 6.6$  Hz, 3 H), 1.26 (s, 9 H).  $^{13}\text{C NMR}$  (101 MHz,  $\text{CD}_3\text{CN}$ )  $\delta$  171.9, 167.0, 164.3, 140.9, 136.0, 132.6, 131.7, 129.9, 129.8, 129.5, 128.3, (117.3, superimposed by the  $\text{CD}_3\text{CN}$  resonance), 90.4, 64.7, 37.5, 37.3, 31.7, 25.9. **HRMS (ESI)** calcd for  $\text{C}_{24}\text{H}_{28}\text{ClN}_2\text{O}^+$  ( $\text{M}^+$ ) 395.1885, found 395.1880.

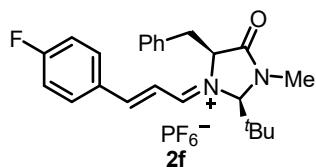

**2f:** Yield: 75%.  $^1\text{H NMR}$  (400 MHz,  $\text{CD}_3\text{CN}$ )  $\delta$  8.45 (d,  $J = 10.8$  Hz, 1 H), 8.00 (d,  $J = 15.0$  Hz, 1 H), 7.54–7.27 (m, 9 H), 6.16 (dd,  $J = 15.0, 10.8$  Hz, 1 H), 5.26 (s, 1 H), 4.87 (dd,  $J = 9.0, 4.7$  Hz, 1 H), 3.58 (dd,  $J = 14.9, 4.8$  Hz, 1 H), 3.27 (dd,  $J = 14.9, 9.1$  Hz, 1 H), 3.11 (s, 3 H), 1.26 (s, 9H).  $^{13}\text{C NMR}$  (101 MHz,  $\text{CD}_3\text{CN}$ )  $\delta$  171.8, 167.1, 166.7 (d,  $J = 259$  Hz), 164.7, 136.1, 134.2 (d,  $J = 10.1$  Hz), 129.9, 129.5, 128.2, 117.0, 116.8, 116.6 (d,  $J = 2.0$  Hz), 90.3, 64.7, 37.5, 37.3, 31.6, 25.9. **HRMS (ESI)** calcd for  $\text{C}_{24}\text{H}_{28}\text{FN}_2\text{O}^+$  ( $\text{M}^+$ ) 379.2180, found 379.2174.

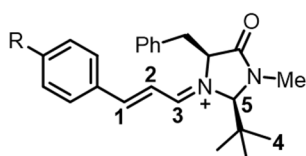

| $^1\text{H NMR}$ | $\text{H}_1$ | $\text{H}_2$ | $\text{H}_3$ | $\text{H}_4$ | $\text{H}_5$ |
|------------------|--------------|--------------|--------------|--------------|--------------|
| <b>2a</b>        | 8.03         | 6.27         | 8.47         | 1.27         | 5.26         |
| <b>2b</b>        | 8.00         | 6.21         | 8.42         | 1.26         | 5.23         |
| <b>2c</b>        | 7.95         | 6.06         | 8.32         | 1.25         | 5.20         |
| <b>2e</b>        | 7.97         | 6.20         | 8.46         | 1.26         | 5.26         |
| <b>2f</b>        | 8.00         | 6.16         | 8.45         | 1.26         | 5.26         |

**Figure S1.** The summary of assignments of partial  $^1\text{H NMR}$  signals for iminiums ions **2**.

### 3. Reactions of Iminium Hexafluorophosphates with Diphenyldiazomethane (4)

Solutions of diphenyldiazomethane **4** (0.30 mmol in 2 mL of different solvents) were slowly added to solutions of the iminium hexafluorophosphates **1a**, **2a**, or **3a** (0.20 mmol in 2 mL of the same solvent) at the temperature specified in the following Table. The solutions were stirred for the indicated time at the specified temperature before aqueous phosphate buffer solution (pH 7.5) was added. After stirring for 30 min, the solutions were extracted with CH<sub>2</sub>Cl<sub>2</sub> (3 × 3 mL) and dried over MgSO<sub>4</sub>. After evaporation of the solvents under reduced pressure, the cyclopropane **5a** was purified by column chromatography (silica gel, EtOAc/hexane 2/100 v/v). Table 1 (main text) lists the results of the individual experiments.

### 4. Cyclopropanation of Iminium Hexafluorophosphates **1** with Diphenyldiazomethane (**4**)

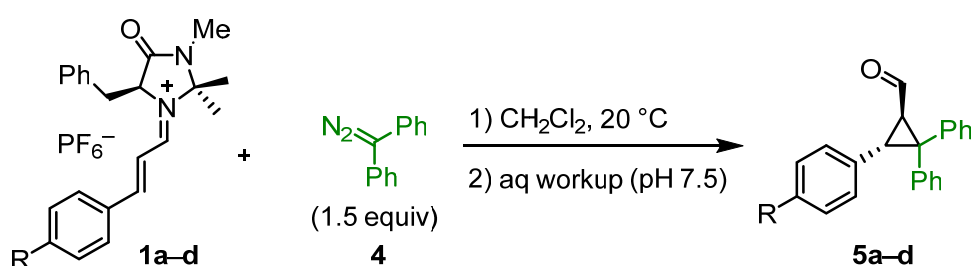

Solutions of diphenyldiazomethane **4** (0.30 mmol in 2 mL of CH<sub>2</sub>Cl<sub>2</sub>) were slowly added to solutions of the iminium hexafluorophosphates **1a-d** (0.20 mmol in 2 mL of CH<sub>2</sub>Cl<sub>2</sub>) at ambient temperature and stirred for 4 h.

Then, aqueous phosphate buffer solution (5 mL, pH 7.5) was added, and the mixture was stirred for 30 min. The mixture was extracted with CH<sub>2</sub>Cl<sub>2</sub> (3 × 3 mL) and dried over MgSO<sub>4</sub>. After evaporation of the solvents under reduced pressure, the products **5** were purified by column chromatography (silica gel, EtOAc/hexane 2/100 v/v).

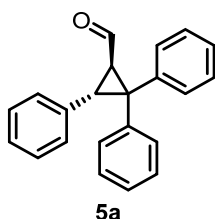

**2,2,3-Triphenylcyclopropane-1-carbaldehyde (5a)**: Yield 69%. <sup>1</sup>H NMR (400 MHz, CDCl<sub>3</sub>) δ 8.90 (d, *J* = 6.5 Hz, 1 H), 7.50 (d, *J* = 8.4 Hz, 2 H), 7.33 (t, *J* = 7.6 Hz, 2 H), 7.23 (t, *J* = 7.4 Hz, 1 H), 7.18–7.04 (m, 8 H), 6.95–6.93 (m, 2 H), 3.76 (d, *J* = 5.7 Hz, 1 H), 3.15–3.12 (m, 1 H). <sup>13</sup>C NMR (101 MHz, CDCl<sub>3</sub>) δ 199.9, 141.4, 139.6, 135.1, 129.5, 129.4, 129.0, 128.4, 128.1, 128.1, 127.4, 126.9, 126.7, 48.7, 40.9, 35.5. HRMS (ESI) calcd for C<sub>22</sub>H<sub>19</sub>O<sup>+</sup> (M + H<sup>+</sup>) 299.1430, found 299.1423.

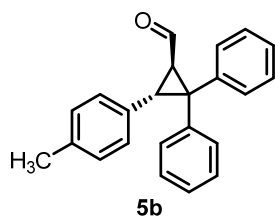

**2,2-Diphenyl-3-(*p*-tolyl)cyclopropane-1-carbaldehyde (5b):** Yield 60%.  $^1\text{H NMR}$  (400 MHz,  $\text{CDCl}_3$ )  $\delta$  8.87 (d,  $J = 6.6$  Hz, 1 H), 7.49 (d,  $J = 7.3$  Hz, 2 H), 7.34–7.30 (m, 2 H), 7.22 (t,  $J = 7.4$  Hz, 1 H), 7.15–7.05 (m, 5 H), 6.95 (d,  $J = 7.9$  Hz, 2 H), 6.81 (d,  $J = 8.0$  Hz, 2 H), 3.72 (d,  $J = 5.7$  Hz, 1 H), 3.10–3.07 (m, 1 H), 2.24 (s, 3 H).  $^{13}\text{C NMR}$  (101 MHz,  $\text{CDCl}_3$ )  $\delta$  200.1, 141.5, 139.7, 136.3, 131.9, 129.52, 129.46, 129.0, 128.8, 128.4, 127.9, 127.4, 126.9, 48.6, 41.2, 35.4, 21.0. **HRMS (ESI)** calcd for  $\text{C}_{23}\text{H}_{21}\text{O}^+$  ( $\text{M} + \text{H}^+$ ) 313.1587, found 313.1578.

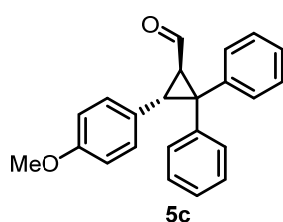

**3-(4-Methoxyphenyl)-2,2-diphenylcyclopropane-1-carbaldehyde (5c):** Yield 72%.  $^1\text{H NMR}$  (400 MHz,  $\text{CDCl}_3$ )  $\delta$  8.86 (d,  $J = 6.5$  Hz, 1 H), 7.49 (d,  $J = 7.3$  Hz, 2 H), 7.34–7.30 (m, 2 H), 7.22 (t,  $J = 7.4$  Hz, 1 H), 7.17–7.04 (m, 5 H), 6.85 (d,  $J = 8.6$  Hz, 2 H), 6.68 (d,  $J = 8.7$  Hz, 2 H), 3.72–3.70 (m, 4 H), 3.07–3.04 (m, 1 H).  $^{13}\text{C NMR}$  (101 MHz,  $\text{CDCl}_3$ )  $\delta$  200.1, 158.4, 141.5, 139.7, 129.5, 129.4, 129.1, 129.0, 128.4, 127.3, 127.0, 126.8, 113.5, 55.2, 48.4, 41.2, 35.0. **HRMS (ESI)** calcd for  $\text{C}_{23}\text{H}_{21}\text{O}_2^+$  ( $\text{M} + \text{H}^+$ ) 329.1536, found 329.1538.

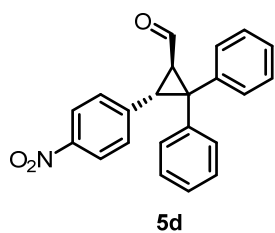

**3-(4-Nitrophenyl)-2,2-diphenylcyclopropane-1-carbaldehyde (5d):** Yield 58%.  $^1\text{H NMR}$  (400 MHz,  $\text{CDCl}_3$ )  $\delta$  8.99 (d,  $J = 8.0$  Hz, 1 H), 8.03 (d,  $J = 8.0$  Hz, 2 H), 7.51–7.49 (m, 2 H), 7.39–7.37 (m, 2 H), 7.35–7.26 (m, 1 H), 7.18–7.09 (m, 7 H), 3.85 (d,  $J = 5.7$  Hz, 1 H), 3.27–3.24 (m, 1 H).  $^{13}\text{C NMR}$  (101 MHz,  $\text{CDCl}_3$ )  $\delta$  198.6, 146.7, 143.2, 140.4, 138.6, 129.3, 129.2, 129.1, 128.8, 128.7, 127.8, 127.5, 123.3, 48.6, 41.2, 34.8. **HRMS (ESI)** calcd for  $\text{C}_{22}\text{H}_{18}\text{NO}_3^+$  ( $\text{M} + \text{H}^+$ ) 344.1281, found 344.1284.



## 5. Cyclopropanation of Iminium Hexafluorophosphates **2** with Diphenyldiazomethane (**4**)

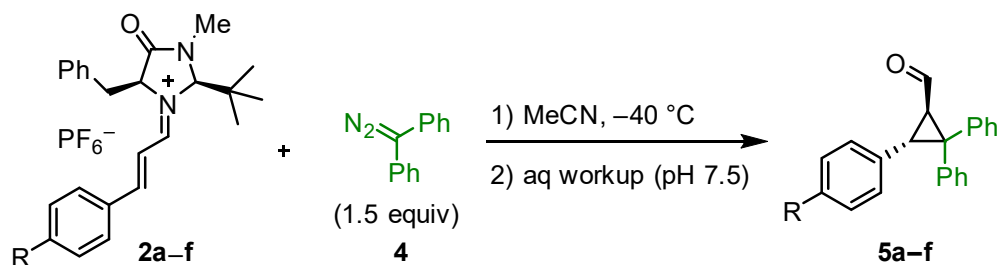

Precooled solutions of diphenyldiazomethane **4** (0.30 mmol in 2 mL of MeCN) were slowly added to solutions of the iminium hexafluorophosphates **2a-f** (0.20 mmol in 2 mL of MeCN) at  $-40\text{ }^\circ\text{C}$  and stirred for 4 h. Then, aqueous phosphate buffer solution (5 mL, pH 7.5) was added and stirred for 30 min. The mixture was extracted with  $\text{CH}_2\text{Cl}_2$  ( $3 \times 3\text{ mL}$ ) and dried over  $\text{MgSO}_4$ . After evaporation of the solvents under reduced pressure, the products **5a-f** were purified by column chromatography (silica gel, EtOAc/hexane 2/100 v/v). NMR spectroscopic analysis of the products showed the exclusive formation of the cyclopropanes **5** with *trans* configuration. For an unequivocal interpretation of the chromatograms, analogous reactions were performed using racemic mixtures of the iminium hexafluorophosphates *rac-2a-f* to synthesize *rac-5a-f*.

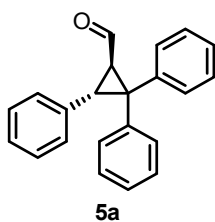

**5a**: Yield 93%.

The enantiomeric purity of **5a** was determined by HPLC analysis in comparison with racemic product (Chiralpak ID, 100:1 hexane: *i*-PrOH, 1.0 mL/min, 220 nm):  $t_{\text{minor}} = 17.5\text{ min}$ ,  $t_{\text{major}} = 18.7\text{ min}$ .

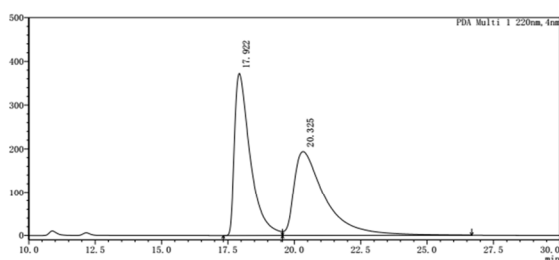

| Entry | Retention time | Peak width (height 50%) | Height | Area     | Area%  |
|-------|----------------|-------------------------|--------|----------|--------|
| 1     | 17.922         | 0.602                   | 372506 | 15395989 | 48.368 |
| 2     | 20.325         | 1.130                   | 193606 | 15790358 | 50.632 |

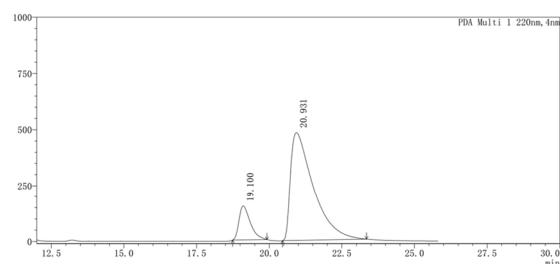

| Entry | Retention time | Peak width (height 50%) | Height | Area     | Area%  |
|-------|----------------|-------------------------|--------|----------|--------|
| 1     | 19.100         | 0.409                   | 150499 | 3362619  | 10.261 |
| 2     | 20.931         | 0.807                   | 482654 | 29408500 | 89.739 |

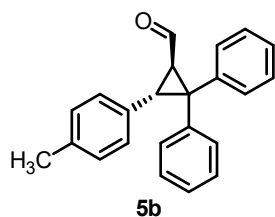

**5b:** Yield 90%.

The enantiomeric purity of **5b** was determined by HPLC analysis in comparison with racemic product (Chiralpak ID, 100:1 hexane: *i*-PrOH, 1.0 mL/min, 220 nm):  $t_{\text{minor}} = 18.6$  min,  $t_{\text{major}} = 20.6$  min.

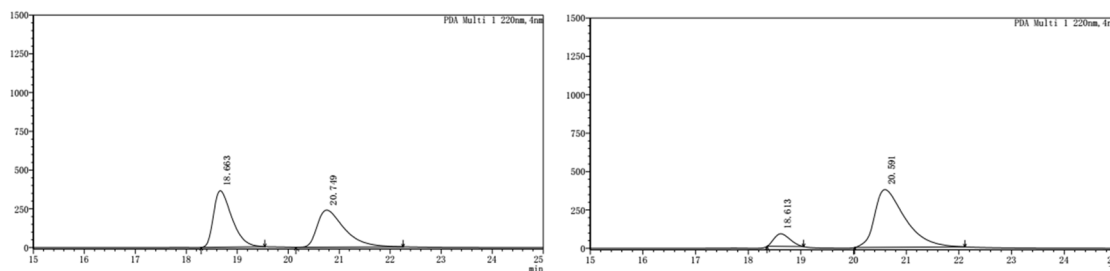

| Entry | Retention time | Peak width (height 50%) | Height | Area    | Area%  |
|-------|----------------|-------------------------|--------|---------|--------|
| 1     | 18.663         | 0.383                   | 364105 | 9106857 | 50.724 |
| 2     | 20.749         | 0.554                   | 238775 | 8846942 | 49.276 |

| Entry | Retention time | Peak width (height 50%) | Height | Area     | Area%  |
|-------|----------------|-------------------------|--------|----------|--------|
| 1     | 18.613         | 0.342                   | 81983  | 1721994  | 10.214 |
| 2     | 20.591         | 0.596                   | 376005 | 15137319 | 89.786 |

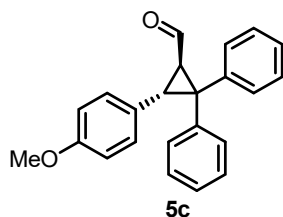

**5c:** Yield 95%.

The enantiomeric purity of **5c** was determined by HPLC analysis in comparison with racemic product (Chiralpak ID, 100:1 hexane: *i*-PrOH, 1.0 mL/min, 220 nm):  $t_{\text{minor}} = 36.6$  min,  $t_{\text{major}} = 41.8$  min.

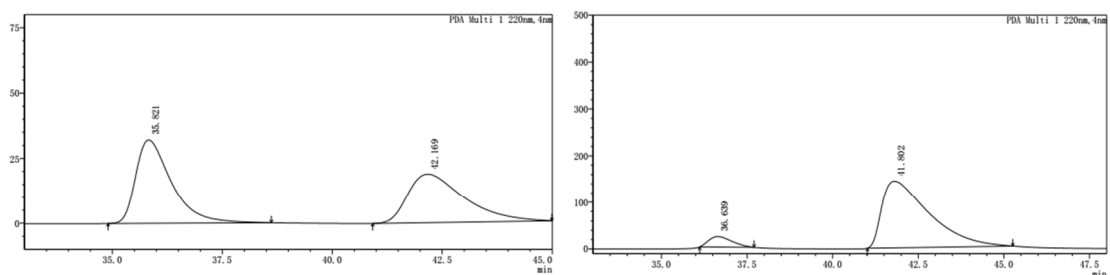

| Entry | Retention time | Peak width (height 50%) | Height | Area    | Area%  |
|-------|----------------|-------------------------|--------|---------|--------|
| 1     | 35.821         | 0.837                   | 32156  | 1830215 | 52.268 |
| 2     | 42.169         | 1.346                   | 18766  | 1671405 | 47.732 |

| Entry | Retention time | Peak width (height 50%) | Height | Area     | Area%  |
|-------|----------------|-------------------------|--------|----------|--------|
| 1     | 36.639         | 0.764                   | 22093  | 1043019  | 7.090  |
| 2     | 41.802         | 1.447                   | 143091 | 13668151 | 92.910 |

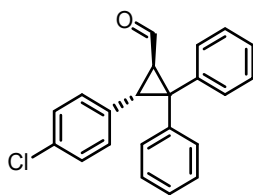

**5e**

**3-(4-Chlorophenyl)-2,2-diphenylcyclopropane-1-carbaldehyde (5e):** Yield 92%. <sup>1</sup>H NMR (400 MHz, CDCl<sub>3</sub>) δ 8.90 (d, *J* = 6.3 Hz, 1 H), 7.47 (d, *J* = 7.5 Hz, 2 H), 7.34–7.31 (m, 2 H), 7.25–7.20 (m, 1 H), 7.18–7.05 (m, 7 H), 6.86 (d, *J* = 8.3 Hz, 2 H), 3.71 (d, *J* = 5.6 Hz, 1 H), 3.10–3.07 (m, 1 H). <sup>13</sup>C NMR (101 MHz, CDCl<sub>3</sub>) δ 199.4, 141.0, 139.2, 133.7, 132.6, 129.4, 129.3, 129.3, 129.1, 128.6, 128.3, 127.5, 127.1, 48.7, 41.0, 34.8. HRMS (ESI) calcd for C<sub>22</sub>H<sub>17</sub>ClNaO<sup>+</sup> (M + Na<sup>+</sup>) 355.0860, found 355.0846.

The enantiomeric purity of **5e** was determined by HPLC analysis in comparison with racemic product (Chiralpak ID, 100:1 hexane:*i*-PrOH, 1.0 mL/min, 220 nm): *t*<sub>minor</sub> = 19.7 min, *t*<sub>major</sub> = 22.9 min.

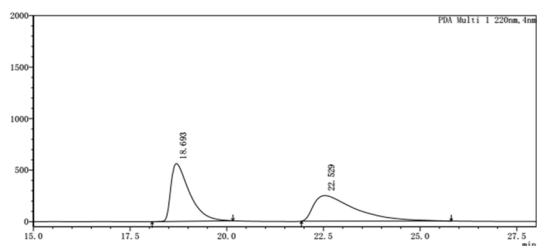

| Entry | Retention time | Peak width (height 50%) | Height | Area     | Area%  |
|-------|----------------|-------------------------|--------|----------|--------|
| 1     | 18.693         | 0.497                   | 560676 | 18733568 | 50.287 |
| 2     | 22.529         | 1.091                   | 247669 | 18519757 | 48.713 |

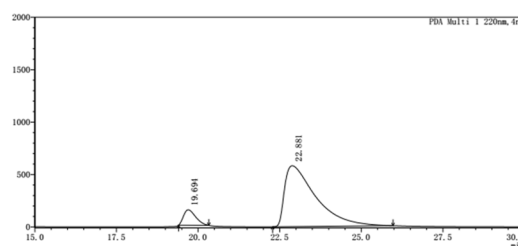

| Entry | Retention time | Peak width (height 50%) | Height | Area     | Area%  |
|-------|----------------|-------------------------|--------|----------|--------|
| 1     | 19.694         | 0.409                   | 147581 | 3787947  | 8.941  |
| 2     | 22.881         | 0.970                   | 580647 | 38579673 | 91.059 |

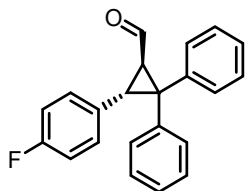

**5f**

**3-(4-Fluorophenyl)-2,2-diphenylcyclopropane-1-carbaldehyde (5f):** Yield 88%. <sup>1</sup>H NMR (400 MHz, CDCl<sub>3</sub>) δ 8.93 (d, *J* = 6.4 Hz, 1 H), 7.52 (d, *J* = 7.1 Hz, 2 H), 7.38–7.34 (m, 2 H), 7.27 (d, *J* = 8.0 Hz, 1 H), 7.14 (m, 5 H), 6.97–6.91 (m, 2 H), 6.87 (t, *J* = 8.7 Hz, 2 H), 3.77 (d, *J* = 5.7 Hz, 1 H), 3.14–3.11 (m, 1 H). <sup>13</sup>C NMR (101 MHz, CDCl<sub>3</sub>) δ 199.6, 162.7 (d, *J* = 246 Hz), 141.1, 139.4, 130.8 (d, *J* = 3.1 Hz), 129.6 (d, *J* = 8.1 Hz), 129.4, 129.4, 129.1, 128.5, 127.5, 127.0, 115.0 (d, *J* = 22.2 Hz), 48.5, 41.0, 34.7. HRMS (ESI) calcd for C<sub>22</sub>H<sub>18</sub>FO<sup>+</sup> (M + H<sup>+</sup>) 317.1336, found 317.1326.

The enantiomeric purity of **5f** was determined by HPLC analysis in comparison with racemic product (Chiralpak ID, 100:1 hexane:*i*-PrOH, 1.0 mL/min, 220 nm): *t*<sub>minor</sub> = 18.6 min, *t*<sub>major</sub> = 20.7 min.

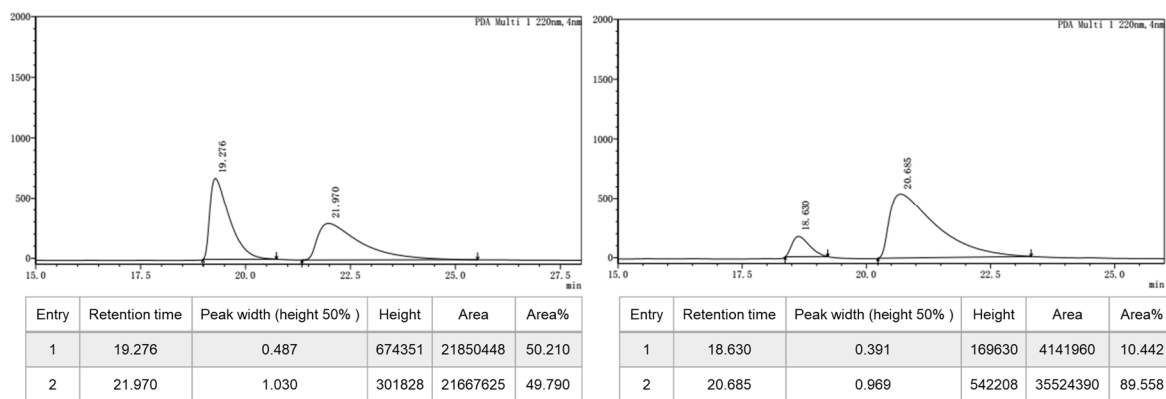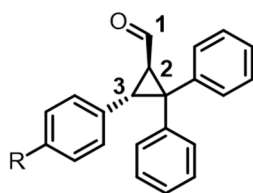

| <sup>1</sup> H NMR | H <sub>1</sub> | H <sub>2</sub> | H <sub>3</sub> |
|--------------------|----------------|----------------|----------------|
| <b>5a</b>          | 8.90           | 3.15-3.12      | 3.76           |
| <b>5b</b>          | 8.87           | 3.10-3.07      | 3.72           |
| <b>5c</b>          | 8.86           | 3.07-3.04      | 3.71           |
| <b>5d</b>          | 8.99           | 3.27-3.24      | 3.85           |
| <b>5e</b>          | 8.90           | 3.10-3.07      | 3.71           |
| <b>5f</b>          | 8.93           | 3.14-3.11      | 3.77           |

**Figure S2.** The summary of assignments of partial <sup>1</sup>H NMR signals for the aldehydes **5**.

## 6. Reactions of Iminium Hexafluorophosphates 1 with Aryldiazomethanes 6

**General Procedure:** Solutions of the aryldiazomethanes **6** (0.50 mmol in 2 mL of CH<sub>2</sub>Cl<sub>2</sub>) were slowly added to solutions of the iminium hexafluorophosphates **1a**, **1b**, or **1d** (0.20 mmol in 2 mL of CH<sub>2</sub>Cl<sub>2</sub>) at -40 °C and stirred while the color of the aryldiazomethane slowly faded. After the solution became pale yellow (about 30 min), the temperature was raised to room temperature and the aq phosphate buffer solution (5 mL) was added. After stirring for 30 min, the mixture was extracted with CH<sub>2</sub>Cl<sub>2</sub> (3 × 3 mL) and dried over MgSO<sub>4</sub>. After evaporation of the solvent under reduced pressure, the product was purified by column chromatography (silica gel, EtOAc/hexane 10/100 v/v).

### Reaction of iminium hexafluorophosphate 1a with phenyldiazomethane 6a

Following General Procedure, **1a** (96 mg, 0.20 mmol) was combined with **6a** (59 mg, 0.50 mmol) to give **7a** (45 mg, 72%) and **8** (19%).

Under the conditions of the ESI method, the aldehydes **7a** and **8** oxidized to the corresponding carboxylates [that is, (M) for the aldehydes converted to (M[O]<sup>-</sup>) for the carboxylates] that were detected in the HRMS.

Molecular Weight: 312.4120

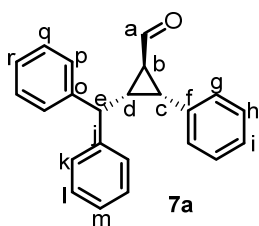

**2-Benzhydryl-3-phenylcyclopropane-1-carbaldehyde (7a):** Yield 72%. **<sup>1</sup>H NMR** (599 MHz, CDCl<sub>3</sub>) δ 9.57 (d, *J* = 3.9 Hz, 1 H, H<sup>a</sup>), 7.29–7.24 (m, 5 H, H<sup>g,i,l</sup>), 7.22 – 7.11 (m, 6 H, H<sup>k,m,p,r</sup>), 7.10–7.05 (m, 2 H, H<sup>h</sup>), 6.90–6.86 (m, 2 H, H<sup>q</sup>), 3.40 (d, *J* = 11.0 Hz, 1 H, H<sup>e</sup>), 3.15 (dd, *J* = 9.5, 5.1 Hz, 1 H, H<sup>c</sup>), 2.64 (ddd, *J* = 11.0, 9.5, 4.8 Hz, 1 H, H<sup>d</sup>), 2.51 (ddd, *J* = 5.0, 5.0, 3.9 Hz, 1 H, H<sup>b</sup>). **<sup>13</sup>C NMR** (151 MHz, CDCl<sub>3</sub>) δ 200.0 (C<sup>a</sup>), 144.1 (C<sup>o</sup>), 143.4 (C<sup>i</sup>), 134.7 (C<sup>f</sup>), 129.1 (2 C, C<sup>h</sup>), 128.8 (2 C, C<sup>l</sup>), 128.4 (4 C, C<sup>g,p</sup>), 128.0 (2 C, C<sup>q</sup>), 128.0 (2 C, C<sup>k</sup>), 127.2 (C<sup>j</sup>), 126.7 (C<sup>r</sup>), 126.5 (C<sup>m</sup>), 48.3 (C<sup>e</sup>), 35.0 (C<sup>d</sup>), 34.8 (C<sup>b</sup>), 33.5 (C<sup>c</sup>). **HRMS (ESI)** calcd for C<sub>23</sub>H<sub>19</sub>O<sub>2</sub><sup>-</sup> (M[O]<sup>-</sup>): calcd. 327.1391, found 327.1392.

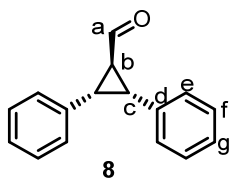

**2,3-Diphenylcyclopropane-1-carbaldehyde (8):** Yield 19%. **<sup>1</sup>H NMR** (599 MHz, CDCl<sub>3</sub>) δ 9.65 (d, *J* = 4.1 Hz, 1 H, H<sup>a</sup>), 7.22–7.11 (m, 6 H, H<sup>e,g</sup>), 6.98–6.93 (m, 4 H, H<sup>f</sup>), 3.19 (d, *J* = 5.2 Hz, 2 H, H<sup>c</sup>), 2.84 (td, *J* = 5.2, 4.1 Hz, 1 H, H<sup>b</sup>). **<sup>13</sup>C NMR** (151 MHz, CDCl<sub>3</sub>) δ 199.8 (C<sup>a</sup>), 135.0 (C<sup>d</sup>), 129.1 (C<sup>f</sup>), 128.2 (C<sup>e</sup>), 126.9 (C<sup>g</sup>), 37.0 (C<sup>b</sup>), 33.6 (C<sup>c</sup>). **HRMS (ESI)** calcd for C<sub>16</sub>H<sub>13</sub>O<sub>2</sub><sup>-</sup> (M[O]<sup>-</sup>): calcd. 237.0921, found 237.0923.

NMR spectroscopic data are in agreement with those in the literature.<sup>[S3]</sup>

### Reaction of iminium hexafluorophosphate **1a** with (4-cyanophenyl)diazomethane **6b**

Following General Procedure, **1a** (96 mg, 0.20 mmol) was combined with **6b** (72 mg, 0.50 mmol) to give **7b** (54 mg, 74%) as a mixture of two diastereoisomers, dr = 81:19.

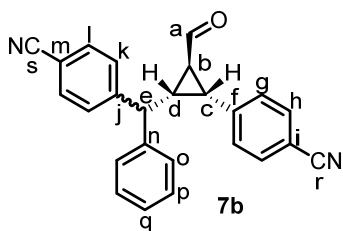

### 4-((2-((4-Cyanophenyl)(phenyl)methyl)-3-formylcyclopropyl)benzonitrile (**7b**): Yield 76%.

\*-signals of major isomer. #-signals of minor isomer.

**<sup>1</sup>H NMR** (599 MHz, CDCl<sub>3</sub>) δ 9.68 (d, *J* = 3.0 Hz, 1 H, H<sup>a</sup>),# 9.65 (d, *J* = 3.3 Hz, 1 H, H<sup>a</sup>),\* 7.57 (d, *J* = 8.3 Hz, 2 H, H<sup>l</sup>),\* 7.57 (d, *J* = 8.3 Hz, 2 H, H<sup>h</sup>)# 7.53 (d, *J* = 8.3 Hz, 2 H, H<sup>h</sup>),\* 7.48 (d, *J* = 8.3 Hz, 2 H, H<sup>l</sup>)# 7.31–7.29 (m, 2 H, H<sup>o</sup>)# 7.27–7.24 (m, 1 H, H<sup>q</sup>)# 7.25 (d, *J* = 6.9 Hz, 2 H, H<sup>k</sup>),\* 7.23–7.19 (m, 3 H, H<sup>o,q</sup>),\* 7.16 (d, *J* = 8.3 Hz, 2 H, H<sup>g</sup>)# 7.14 (d, *J* = 8.3 Hz, 2 H, H<sup>g</sup>),\* 7.10 (d, *J* = 7.3 Hz, 2 H, H<sup>p</sup>)# 6.98 (d, *J* = 8.4 Hz, 2 H, H<sup>k</sup>)# 6.88–6.81 (m, 2 H, H<sup>p</sup>),\* 3.34 (d, *J* = 11.0 Hz, 1 H, H<sup>e</sup>)# 3.29 (d, *J* = 11.1 Hz, 1 H, H<sup>e</sup>),\* 3.16 (dd, *J* = 9.6, 5.1 Hz, 1 H, H<sup>c</sup>),\*# 2.69 (ddd, *J* = 11.0, 9.6, 4.8 Hz, 1 H, H<sup>d</sup>),\* 2.72–2.65 (m, 1 H, H<sup>d</sup>)# 2.63 (ddd, *J* = 5.1, 5.1, 3.0 Hz, 1 H, H<sup>b</sup>)# 2.58 (ddd, *J* = 5.0, 5.0, 3.3 Hz, 1 H, H<sup>b</sup>)\*. **<sup>13</sup>C NMR** (151 MHz, CDCl<sub>3</sub>) δ 198.6 (C<sup>a</sup>),# 198.5 (C<sup>a</sup>),\* 148.8 (C<sup>l</sup>),\* 148.0 (C<sup>l</sup>),# 142.0 (C<sup>n</sup>),# 141.0 (C<sup>n</sup>),\* 140.2 (C<sup>f</sup>),# 140.0 (C<sup>f</sup>),\* 132.8 (2 C, C<sup>l</sup>),\* 132.4 (2 C, C<sup>l</sup>),# 132.3 (2 C, C<sup>h</sup>),# 132.1 (2 C, C<sup>h</sup>),\* 129.8 (2 C, C<sup>g</sup>),\* 129.5 (2 C, C<sup>g</sup>),# 129.2 (2 C, C<sup>o</sup>),# 128.9 (2 C, C<sup>o</sup>),\* 128.5 (2 C, C<sup>k</sup>),\* 128.5 (2 C, C<sup>k</sup>),# 127.73 (2 C, C<sup>p</sup>),\* 127.65 (2 C, C<sup>p</sup>),# 127.54 (C<sup>q</sup>),# 127.47 (C<sup>q</sup>),\* 118.7 (C<sup>r</sup>),\* 118.6 (C<sup>s</sup>),\* 118.6 (C<sup>s</sup>),# 118.5 (C<sup>r</sup>),# 111.5 (C<sup>l</sup>),# 111.4 (C<sup>l</sup>),\* 111.02 (C<sup>m</sup>),\* 110.95 (C<sup>m</sup>),# 49.0 (C<sup>e</sup>),\* 48.6 (C<sup>e</sup>),# 34.7 (C<sup>d</sup>),# 34.4 (C<sup>b</sup>),\* 34.3 (C<sup>d</sup>),\* 34.2 (C<sup>b</sup>),# 33.1 (C<sup>c</sup>),# 32.9 (C<sup>c</sup>)\*. **HRMS (ESI)** calcd for C<sub>25</sub>H<sub>17</sub>N<sub>2</sub>O<sup>-</sup> (M – H<sup>+</sup>) 361.1346, found 361.1352.

### Reaction of iminium hexafluorophosphate **1b** with (4-cyanophenyl)diazomethane **6b**

Following General Procedure, **1b** (98 mg, 0.20 mmol) was combined with **3b** (72 mg, 0.50 mmol) to give **7c** (53 mg, 70%) as a mixture of two diastereoisomers, dr = 79:21.

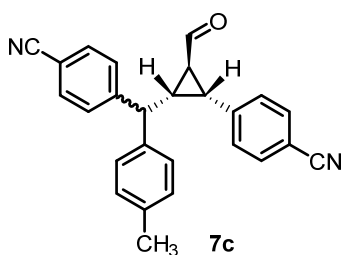

### 4-(2-((4-Cyanophenyl)(p-tolyl)methyl)-3-formylcyclopropyl)benzonitrile (**7c**): Yield 70%.

Major isomer: **<sup>1</sup>H NMR** (400 MHz, CDCl<sub>3</sub>) δ 9.66 (d, *J* = 3.3 Hz, 1 H), 7.59–7.55 (m, 4 H), 7.27 (d, *J* = 8.2 Hz, 2 H), 7.18 (d, *J* = 8.2 Hz, 2 H), 7.04 (d, *J* = 7.9 Hz, 2 H), 6.75 (d, *J* = 8.0 Hz, 2 H), 3.27 (d, *J* = 11.1 Hz, 1 H), 3.18 (dd, *J* = 9.5, 5.1 Hz, 1 H), 2.75–2.66 (m, 1 H), 2.57 (dd, *J* = 8.4, 5.0 Hz, 1 H), 2.32 (s, 3 H). **HRMS (ESI)** calcd for C<sub>26</sub>H<sub>20</sub>N<sub>2</sub>NaO<sup>+</sup> (M + Na<sup>+</sup>) 399.1468, found 399.1458.

**Reaction of iminium hexafluorophosphate 1d with (4-cyanophenyl)diazomethane 6b**

Following General Procedure, **1d** (105 mg, 0.20 mmol) was combined with **6b** (72 mg, 0.50 mmol) to give **7d** (57 mg, 0.14 mmol, 70%) as a mixture of two diastereoisomers, dr = 83:17.

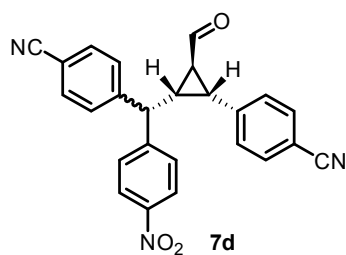

**4-(2-((4-Cyanophenyl)(4-nitrophenyl)methyl)-3-formylcyclopropyl)benzonitrile (7d)**: Yield 70%. Major isomer:  $^1\text{H NMR}$  (400 MHz,  $\text{CDCl}_3$ )  $\delta$  9.73 (d,  $J = 2.1$  Hz, 1 H), 8.08 (d,  $J = 8.5$  Hz, 2 H), 7.63–7.57 (m, 4 H), 7.26–7.24 (m, 2 H), 7.17 (d,  $J = 7.9$  Hz, 2 H), 7.03 (d,  $J = 8.4$  Hz, 2 H), 3.44 (d,  $J = 10.9$  Hz, 1 H), 3.19 (dd,  $J = 9.2, 5.2$  Hz, 1 H), 2.78–2.61 (m, 2 H). **HRMS (ESI)** calcd for  $\text{C}_{25}\text{H}_{17}\text{N}_3\text{NaO}_3^+$  ( $M + \text{Na}^+$ ) 430.1162, found 430.1154.

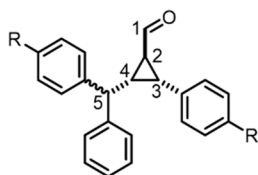

| $^1\text{H NMR}$ | H <sub>1</sub> | H <sub>2</sub> | H <sub>3</sub> | H <sub>4</sub> | H <sub>5</sub> |
|------------------|----------------|----------------|----------------|----------------|----------------|
| <b>7a</b>        | 9.57           | 2.51           | 3.15           | 2.64           | 3.40           |
| <b>7b</b>        | 9.68           | 2.58           | 3.16           | 2.69           | 3.34           |
| <b>7c</b>        | 9.66           | 2.57           | 3.18           | 2.75-2.66      | 3.27           |
| <b>7d</b>        | 9.73           | 2.78-2.61      | 3.19           | 2.78-2.61      | 3.44           |

**Figure S3.** The summary of assignments of partial  $^1\text{H NMR}$  signals for the cyclopropane-1-carbaldehydes **7**.

## 7. Oxidation of 7b

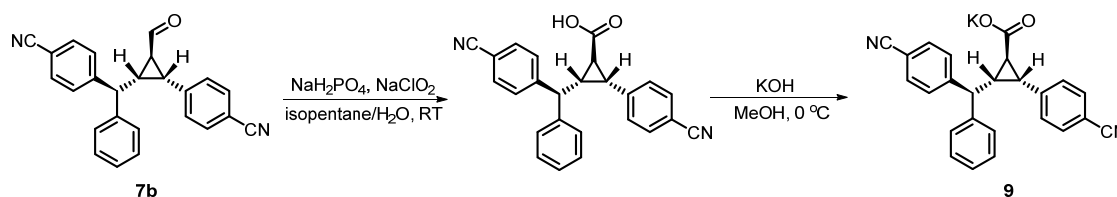

A solution of  $\text{NaH}_2\text{PO}_4$  (71 mg) and  $\text{NaClO}_2$  (69 mg) in water (1.0 mL) was added dropwise to a solution of **7b** (29 mg) in isopentane (0.50 mL). The mixture was stirred at room temperature overnight and then poured into brine. The crude mixture was extracted with ethyl acetate and the organic layers were combined and dried over  $\text{Na}_2\text{SO}_4$ . The crude product was purified by flash chromatography (ethyl acetate:pentane = 2:1) and dissolved in 1 mL of MeOH. After addition of 46  $\mu\text{L}$  of a methanolic solution of KOH (1.74 M) at 0 °C the mixture was kept at room temperature for 1 h. After evaporation of the solvent an oily mixture remained which was dissolved in EtOH/THF to yield crystals of **9** suitable for single crystal XRD analysis.

## 8. Attempts to Catalyze the Reactions of Cinnamaldehyde with Aryldiazomethanes by MacMillan Catalysts

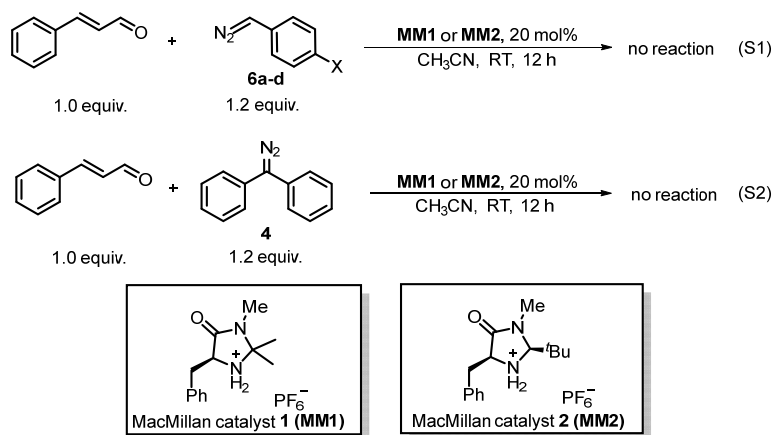

To a solution of cinnamaldehyde (0.20 mmol) and MacMillan catalyst (**MM1** or **MM2**, 0.04 mmol, 20 mol%) in  $\text{CH}_3\text{CN}$  (2.0 mL), aryldiazomethanes **6a-d** or **4** (1.2 equiv) were added at ambient temperature and stirred for 12 h. TLC analysis showed mostly non-converted starting materials and the absence of products **5**, **7**, and **8**.

In order to explore the reason for the failure of these reactions, the aryldiazomethanes were combined with an equimolar amount of the imidazolidinone hexafluorophosphates **MM1** and **MM2**. Immediate disappearance of the color of the aryldiazomethanes and evolution of gas was observed indicating that the aryldiazomethanes deprotonate and thus deactivate the imidazolidinone hexafluorophosphates **MM1** and **MM2**.



## 9. Kinetics of the Reactions of Iminium Salts with Aryldiazomethanes

**Table S1.** Kinetics of the reaction of **1a** with **6a** in CH<sub>2</sub>Cl<sub>2</sub> at 20 °C (stopped-flow, λ = 370 nm).

| [1a]/M                                                 | [6a]/M                | [6a]/[1a] | $k_{\text{obs}}/\text{s}^{-1}$ |
|--------------------------------------------------------|-----------------------|-----------|--------------------------------|
| $3.76 \times 10^{-5}$                                  | $6.52 \times 10^{-4}$ | 17.3      | 1.17                           |
| $3.76 \times 10^{-5}$                                  | $9.77 \times 10^{-4}$ | 26.0      | 1.82                           |
| $3.76 \times 10^{-5}$                                  | $1.30 \times 10^{-3}$ | 34.6      | 2.56                           |
| $3.76 \times 10^{-5}$                                  | $1.63 \times 10^{-3}$ | 43.3      | 3.16                           |
| $k_2 = 2.07 \times 10^3 \text{ M}^{-1} \text{ s}^{-1}$ |                       |           |                                |

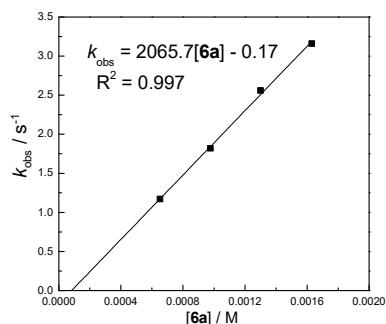

**Table S2.** Kinetics of the reaction of **1a** with **6b** in CH<sub>2</sub>Cl<sub>2</sub> at 20 °C (J&M, λ = 370 nm).

| [1a]/M                                                 | [6b]/M                | [1a]/[6b] | $k_{\text{obs}}/\text{s}^{-1}$ |
|--------------------------------------------------------|-----------------------|-----------|--------------------------------|
| $8.77 \times 10^{-5}$                                  | $1.17 \times 10^{-3}$ | 13.3      | $2.57 \times 10^{-2}$          |
| $8.73 \times 10^{-5}$                                  | $1.55 \times 10^{-3}$ | 17.8      | $3.73 \times 10^{-2}$          |
| $8.70 \times 10^{-5}$                                  | $1.93 \times 10^{-3}$ | 22.2      | $4.58 \times 10^{-2}$          |
| $8.66 \times 10^{-5}$                                  | $2.31 \times 10^{-3}$ | 26.6      | $5.69 \times 10^{-2}$          |
| $k_2 = 2.69 \times 10^1 \text{ M}^{-1} \text{ s}^{-1}$ |                       |           |                                |

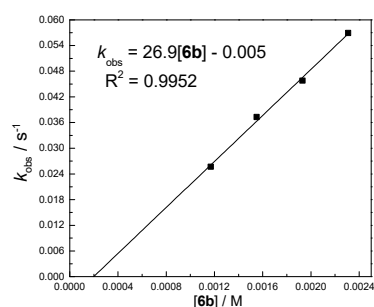

**Table S3.** Kinetics of the reaction of **1a** with **6c** in CH<sub>2</sub>Cl<sub>2</sub> at 20 °C (stopped-flow, λ = 370 nm).

| [1a]/M                                                 | [6c]/M                | [1a]/[6c] | $k_{\text{obs}}/\text{s}^{-1}$ |
|--------------------------------------------------------|-----------------------|-----------|--------------------------------|
| $1.48 \times 10^{-4}$                                  | $1.54 \times 10^{-3}$ | 10.4      | $6.90 \times 10^{-1}$          |
| $1.48 \times 10^{-4}$                                  | $2.05 \times 10^{-3}$ | 13.9      | $9.31 \times 10^{-1}$          |
| $1.48 \times 10^{-4}$                                  | $2.57 \times 10^{-3}$ | 17.3      | 1.20                           |
| $1.48 \times 10^{-4}$                                  | $3.08 \times 10^{-3}$ | 20.8      | 1.44                           |
| $1.48 \times 10^{-4}$                                  | $3.60 \times 10^{-3}$ | 24.3      | 1.61                           |
| $k_2 = 4.56 \times 10^2 \text{ M}^{-1} \text{ s}^{-1}$ |                       |           |                                |

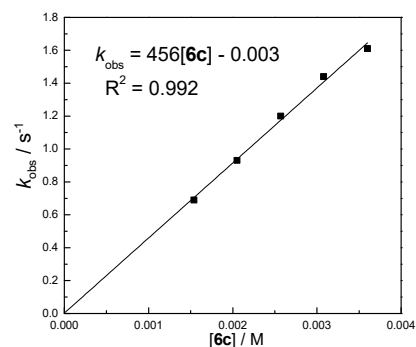

**Table S4.** Kinetics of the reaction of **1b** with **6a** in CH<sub>2</sub>Cl<sub>2</sub> at 20 °C (stopped-flow, λ = 388 nm).

| [1b]/M                                                 | [6a]/M                | [6a]/[1b] | $k_{\text{obs}}/\text{s}^{-1}$ |
|--------------------------------------------------------|-----------------------|-----------|--------------------------------|
| $2.03 \times 10^{-5}$                                  | $6.52 \times 10^{-4}$ | 32.1      | $3.54 \times 10^{-1}$          |
| $2.03 \times 10^{-5}$                                  | $9.77 \times 10^{-4}$ | 48.1      | $5.38 \times 10^{-1}$          |
| $2.03 \times 10^{-5}$                                  | $1.30 \times 10^{-3}$ | 64.2      | $7.35 \times 10^{-1}$          |
| $2.03 \times 10^{-5}$                                  | $1.63 \times 10^{-3}$ | 80.2      | $9.44 \times 10^{-1}$          |
| $2.03 \times 10^{-5}$                                  | $1.95 \times 10^{-3}$ | 96.3      | 1.15                           |
| $k_2 = 6.11 \times 10^2 \text{ M}^{-1} \text{ s}^{-1}$ |                       |           |                                |

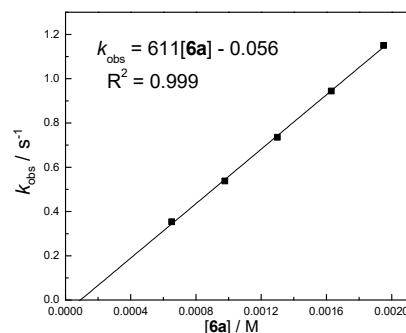

**Table S5.** Kinetics of the reaction of **1b** with **6b** in CH<sub>2</sub>Cl<sub>2</sub> at 20 °C (J&M, λ = 388 nm).

| [1b]/M                                                 | [6b]/M                | [6b]/[1b] | $k_{\text{obs}}/\text{s}^{-1}$ |
|--------------------------------------------------------|-----------------------|-----------|--------------------------------|
| $1.11 \times 10^{-4}$                                  | $1.51 \times 10^{-3}$ | 13.6      | $1.93 \times 10^{-2}$          |
| $1.11 \times 10^{-4}$                                  | $1.88 \times 10^{-3}$ | 17.0      | $2.30 \times 10^{-2}$          |
| $1.10 \times 10^{-4}$                                  | $2.25 \times 10^{-3}$ | 20.4      | $3.04 \times 10^{-2}$          |
| $1.10 \times 10^{-4}$                                  | $2.61 \times 10^{-3}$ | 23.9      | $3.64 \times 10^{-2}$          |
| $1.09 \times 10^{-4}$                                  | $2.98 \times 10^{-3}$ | 27.3      | $4.04 \times 10^{-2}$          |
| $k_2 = 1.51 \times 10^1 \text{ M}^{-1} \text{ s}^{-1}$ |                       |           |                                |

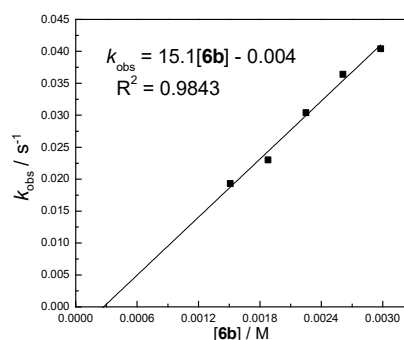**Table S6.** Kinetics of the reaction of **1b** with **6c** in CH<sub>2</sub>Cl<sub>2</sub> at 20 °C (stopped-flow, λ = 388 nm).

| [1b]/M                                                 | [6c]/M                | [6c]/[1b] | $k_{\text{obs}}/\text{s}^{-1}$ |
|--------------------------------------------------------|-----------------------|-----------|--------------------------------|
| $3.14 \times 10^{-5}$                                  | $1.07 \times 10^{-3}$ | 33.9      | $2.27 \times 10^{-1}$          |
| $3.14 \times 10^{-5}$                                  | $1.60 \times 10^{-3}$ | 50.9      | $3.60 \times 10^{-1}$          |
| $3.14 \times 10^{-5}$                                  | $2.13 \times 10^{-3}$ | 67.8      | $4.74 \times 10^{-1}$          |
| $3.14 \times 10^{-5}$                                  | $2.66 \times 10^{-3}$ | 84.8      | $5.47 \times 10^{-1}$          |
| $3.14 \times 10^{-5}$                                  | $3.20 \times 10^{-3}$ | 108       | $6.60 \times 10^{-1}$          |
| $k_2 = 1.98 \times 10^2 \text{ M}^{-1} \text{ s}^{-1}$ |                       |           |                                |

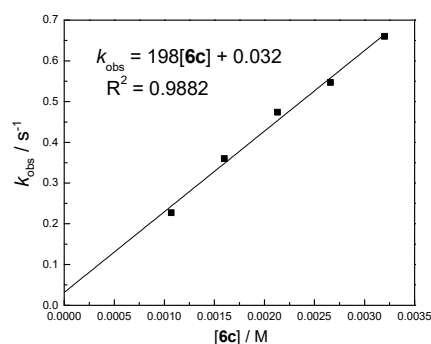**Table S7.** Kinetics of the reaction of **1c** with **6a** in CH<sub>2</sub>Cl<sub>2</sub> at 20 °C (stopped-flow, λ = 426 nm).

| [1c]/M                                                 | [6a]/M                | [6a]/[1c] | $k_{\text{obs}}/\text{s}^{-1}$ |
|--------------------------------------------------------|-----------------------|-----------|--------------------------------|
| $1.38 \times 10^{-5}$                                  | $6.52 \times 10^{-4}$ | 47.3      | $8.35 \times 10^{-2}$          |
| $1.38 \times 10^{-5}$                                  | $9.77 \times 10^{-4}$ | 71.0      | $1.26 \times 10^{-1}$          |
| $1.38 \times 10^{-5}$                                  | $1.30 \times 10^{-3}$ | 94.7      | $1.67 \times 10^{-1}$          |
| $1.38 \times 10^{-5}$                                  | $1.63 \times 10^{-3}$ | 118       | $2.13 \times 10^{-1}$          |
| $1.38 \times 10^{-5}$                                  | $1.95 \times 10^{-3}$ | 142       | $2.59 \times 10^{-1}$          |
| $k_2 = 1.35 \times 10^2 \text{ M}^{-1} \text{ s}^{-1}$ |                       |           |                                |

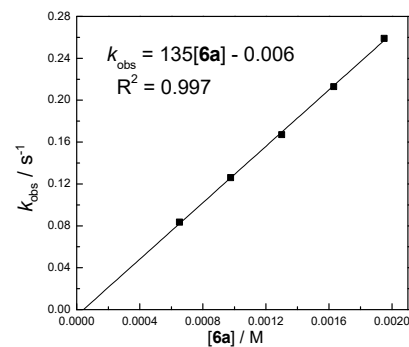**Table S8.** Kinetics of the reaction of **1c** with **6b** in CH<sub>2</sub>Cl<sub>2</sub> at 20 °C (J&M, λ = 426 nm).

| [1c]/M                                     | [6b]/M                | [6b]/[1c] | $k_{\text{obs}}/\text{s}^{-1}$ |
|--------------------------------------------|-----------------------|-----------|--------------------------------|
| $3.39 \times 10^{-5}$                      | $1.49 \times 10^{-3}$ | 43.9      | $3.63 \times 10^{-3}$          |
| $3.38 \times 10^{-5}$                      | $1.85 \times 10^{-3}$ | 54.9      | $4.71 \times 10^{-3}$          |
| $3.36 \times 10^{-5}$                      | $2.21 \times 10^{-3}$ | 65.9      | $5.50 \times 10^{-3}$          |
| $3.35 \times 10^{-5}$                      | $2.57 \times 10^{-3}$ | 76.9      | $6.61 \times 10^{-3}$          |
| $3.33 \times 10^{-5}$                      | $2.93 \times 10^{-3}$ | 87.8      | $7.97 \times 10^{-3}$          |
| $k_2 = 2.94 \text{ M}^{-1} \text{ s}^{-1}$ |                       |           |                                |

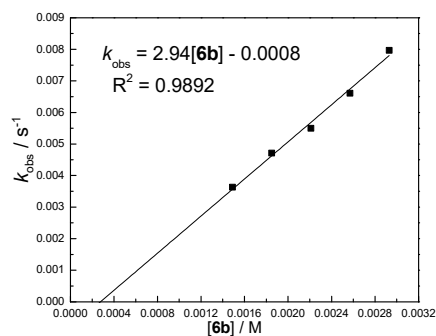

**Table S9.** Kinetics of the reaction of **1c** with **6c** in CH<sub>2</sub>Cl<sub>2</sub> at 20 °C (stopped-flow, λ = 426 nm).

| [1c]/M                                                 | [6c]/M                | [6c]/[1c] | $k_{\text{obs}}/\text{s}^{-1}$ |
|--------------------------------------------------------|-----------------------|-----------|--------------------------------|
| $4.78 \times 10^{-5}$                                  | $2.03 \times 10^{-3}$ | 42.5      | $8.14 \times 10^{-2}$          |
| $4.78 \times 10^{-5}$                                  | $2.54 \times 10^{-3}$ | 53.1      | $1.06 \times 10^{-1}$          |
| $4.78 \times 10^{-5}$                                  | $3.05 \times 10^{-3}$ | 63.7      | $1.30 \times 10^{-1}$          |
| $4.78 \times 10^{-5}$                                  | $3.55 \times 10^{-3}$ | 74.3      | $1.47 \times 10^{-1}$          |
| $4.78 \times 10^{-5}$                                  | $4.06 \times 10^{-3}$ | 85.0      | $1.80 \times 10^{-1}$          |
| $k_2 = 4.70 \times 10^1 \text{ M}^{-1} \text{ s}^{-1}$ |                       |           |                                |

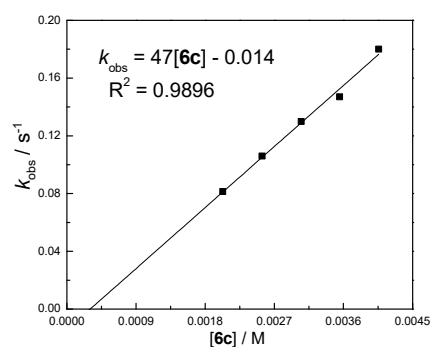**Table S10.** Kinetics of the reaction of **1a** with **4** in CH<sub>2</sub>Cl<sub>2</sub> at 20 °C (UV-Vis, λ = 400 nm).

| [1a]/M                                                    | [4]/M                 | [4]/[1a] | $k_{\text{obs}}/\text{s}^{-1}$ |
|-----------------------------------------------------------|-----------------------|----------|--------------------------------|
| $9.48 \times 10^{-5}$                                     | $4.26 \times 10^{-3}$ | 44.9     | $4.91 \times 10^{-4}$          |
| $9.48 \times 10^{-5}$                                     | $4.38 \times 10^{-3}$ | 46.2     | $5.08 \times 10^{-4}$          |
| $9.48 \times 10^{-5}$                                     | $5.10 \times 10^{-3}$ | 53.8     | $5.91 \times 10^{-4}$          |
| $9.48 \times 10^{-5}$                                     | $5.79 \times 10^{-3}$ | 61.1     | $7.23 \times 10^{-4}$          |
| $k_2 = 1.48 \times 10^{-1} \text{ M}^{-1} \text{ s}^{-1}$ |                       |          |                                |

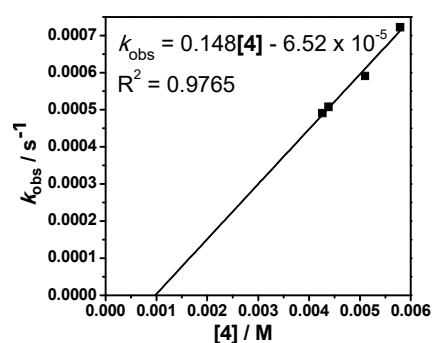**Table S11.** Kinetics of the reaction of **1b** with **4** in CH<sub>2</sub>Cl<sub>2</sub> at 20 °C (UV-Vis, λ = 410 nm).

| [1b]/M                                                    | [4]/M                 | [4]/[1b] | $k_{\text{obs}}/\text{s}^{-1}$ |
|-----------------------------------------------------------|-----------------------|----------|--------------------------------|
| $3.25 \times 10^{-5}$                                     | $2.18 \times 10^{-3}$ | 67.1     | $1.36 \times 10^{-4}$          |
| $3.25 \times 10^{-5}$                                     | $2.70 \times 10^{-3}$ | 83.1     | $1.63 \times 10^{-4}$          |
| $3.25 \times 10^{-5}$                                     | $3.30 \times 10^{-3}$ | 102      | $2.12 \times 10^{-4}$          |
| $3.25 \times 10^{-5}$                                     | $3.87 \times 10^{-3}$ | 119      | $2.42 \times 10^{-4}$          |
| $k_2 = 6.48 \times 10^{-2} \text{ M}^{-1} \text{ s}^{-1}$ |                       |          |                                |

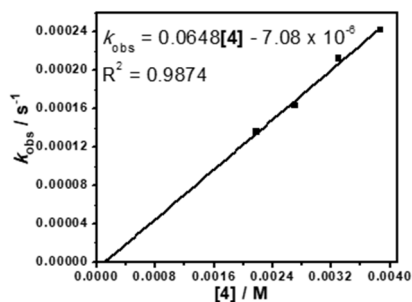**Table S12.** Kinetics of the reaction of **1c** with **4** in CH<sub>2</sub>Cl<sub>2</sub> at 20 °C (UV-Vis, λ = 425 nm).

| [1c]/M                                                    | [4]/M                 | [4]/[1c] | $k_{\text{obs}}/\text{s}^{-1}$ |
|-----------------------------------------------------------|-----------------------|----------|--------------------------------|
| $1.14 \times 10^{-5}$                                     | $2.65 \times 10^{-3}$ | 23.2     | $4.95 \times 10^{-5}$          |
| $1.14 \times 10^{-5}$                                     | $3.17 \times 10^{-3}$ | 27.8     | $5.74 \times 10^{-5}$          |
| $1.14 \times 10^{-5}$                                     | $3.53 \times 10^{-3}$ | 31.0     | $6.33 \times 10^{-5}$          |
| $1.14 \times 10^{-5}$                                     | $4.06 \times 10^{-3}$ | 35.6     | $7.44 \times 10^{-5}$          |
| $k_2 = 1.76 \times 10^{-2} \text{ M}^{-1} \text{ s}^{-1}$ |                       |          |                                |

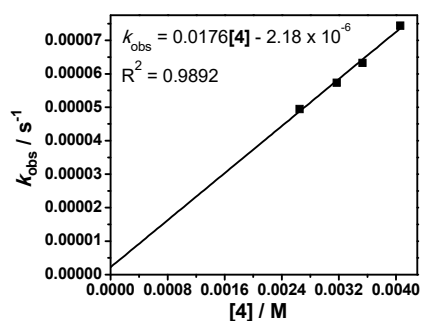

**Table S13.** Kinetics of the reaction of **1d** with **4** in CH<sub>2</sub>Cl<sub>2</sub> at 20 °C (UV-Vis, λ = 390 nm).

| [1d]/M                                                    | [4]/M                 | [4]/[1d] | $k_{\text{obs}}/\text{s}^{-1}$ |
|-----------------------------------------------------------|-----------------------|----------|--------------------------------|
| $7.79 \times 10^{-5}$                                     | $1.35 \times 10^{-3}$ | 17.3     | $1.03 \times 10^{-3}$          |
| $7.79 \times 10^{-5}$                                     | $1.58 \times 10^{-3}$ | 20.3     | $1.14 \times 10^{-3}$          |
| $7.79 \times 10^{-5}$                                     | $1.71 \times 10^{-3}$ | 22.0     | $1.21 \times 10^{-3}$          |
| $7.79 \times 10^{-5}$                                     | $1.96 \times 10^{-3}$ | 25.2     | $1.32 \times 10^{-3}$          |
| $k_2 = 4.73 \times 10^{-1} \text{ M}^{-1} \text{ s}^{-1}$ |                       |          |                                |

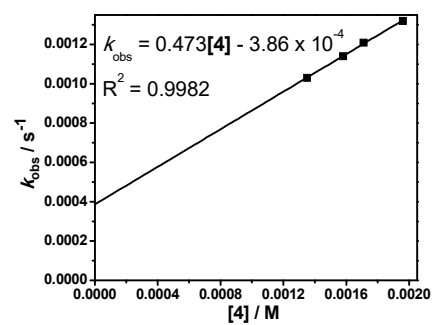**Table S14.** Kinetics of the reaction of **2a** with **4** in CH<sub>2</sub>Cl<sub>2</sub> at 20 °C (UV-Vis, λ = 400 nm).

| [2a]/M                                                    | [4]/M                 | [4]/[2a] | $k_{\text{obs}}/\text{s}^{-1}$ |
|-----------------------------------------------------------|-----------------------|----------|--------------------------------|
| $2.87 \times 10^{-5}$                                     | $1.07 \times 10^{-3}$ | 37.3     | $6.45 \times 10^{-4}$          |
| $2.87 \times 10^{-5}$                                     | $1.99 \times 10^{-3}$ | 69.3     | $1.12 \times 10^{-3}$          |
| $2.87 \times 10^{-5}$                                     | $2.78 \times 10^{-3}$ | 96.9     | $1.56 \times 10^{-3}$          |
| $2.87 \times 10^{-5}$                                     | $3.53 \times 10^{-3}$ | 123      | $2.01 \times 10^{-3}$          |
| $k_2 = 5.54 \times 10^{-1} \text{ M}^{-1} \text{ s}^{-1}$ |                       |          |                                |

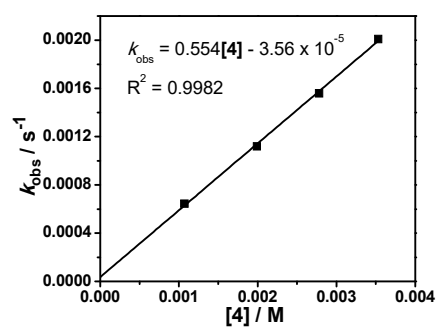

## 10. Computational Details

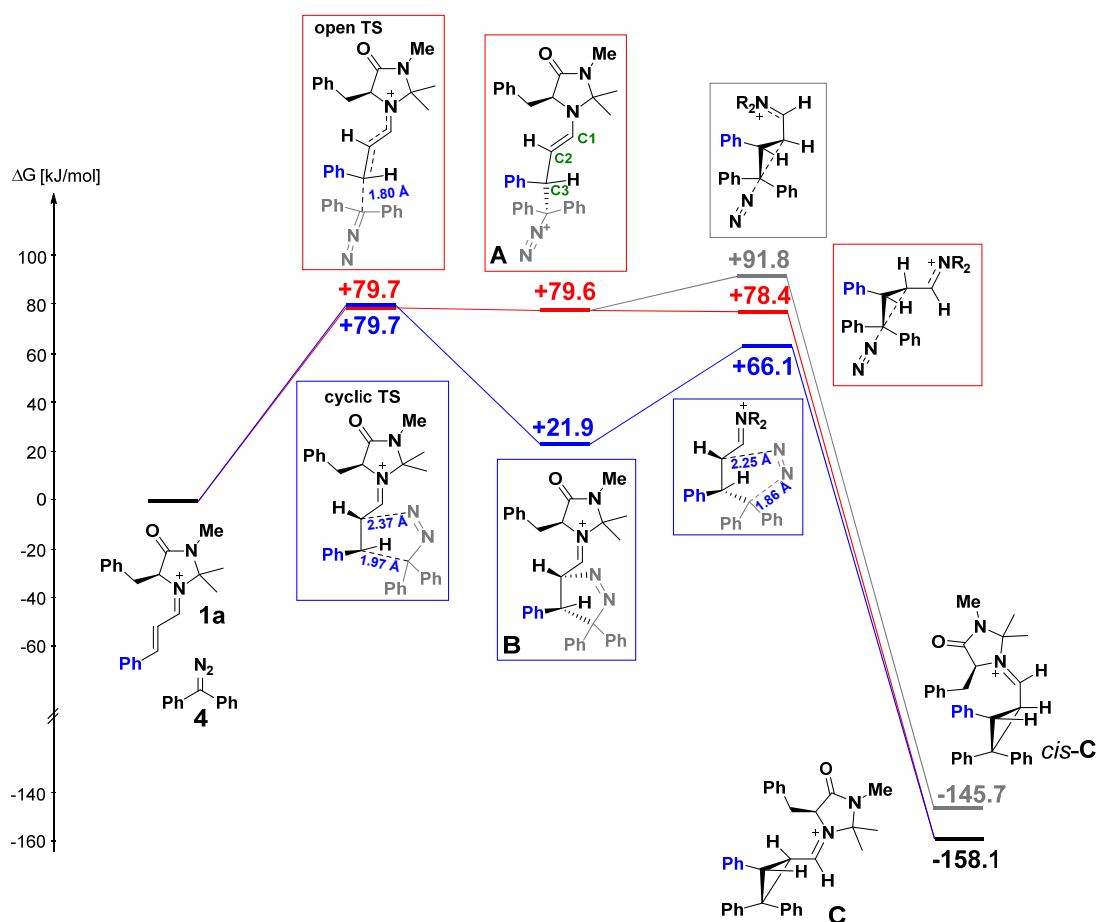

**Figure S4.** Gibbs energy profile for the reaction of iminium ion **1a** with diphenyldiazomethane (**4**) at the (SMD=DCM)//B3LYP-D3BJ/def2svp level of theory, which additionally shows the transition state for the formation of *cis*-configured **C** (in grey) that was not observed experimentally.

Initially, all structures were subjected to a conformational search with the OPLS3<sup>[S4]</sup> force field as implemented in MacroModel<sup>[S5]</sup> with the MCMM method in gas phase. All subsequent quantum-chemical calculations were performed with the Gaussian 16 A.03 set of codes.<sup>[S6]</sup> All structures were optimized at the B3LYP-D3BJ/def2svp<sup>[S7]</sup> level of theory considering solvation by the SMD model for dichloromethane<sup>[S8]</sup> and dispersion corrections by the method of Grimme.<sup>[S9]</sup> Thermal corrections at 298 K were obtained at the same level of theory from vibrational frequencies and are unscaled. Transition states were validated by the presence of one imaginary frequency and IRC calculations. All conformers were Boltzmann weighted. Finally, a free energy correction +7.91 kJ mol<sup>-1</sup> was applied to all free energies to consider the conversion from gas phase (1 atm) to liquid phase (1 M).

Table S15.

| <b>1a + 4</b>                |                   |                  |                  |           |
|------------------------------|-------------------|------------------|------------------|-----------|
|                              | Filename          | E <sub>tot</sub> | G <sub>298</sub> | Weighting |
| <b>1a</b>                    | REDO_1a_1         | -1037.381312     | -1037.007311     | 0.42631   |
|                              | REDO_1a_2         | -1037.382784     | -1037.007301     | 0.42156   |
|                              | REDO_1a_4         | -1037.376233     | -1037.006339     | 0.15213   |
|                              | Weighted          |                  | -1037.007159     |           |
| <b>4a</b>                    | REDO_4_1          | -610.487969      | -610.331291      |           |
| Nitrogen                     | nitrogen          | -109.434977      | -109.447736      |           |
| cyclic TS ( <b>1a + 4a</b> ) | REDO_f_7_ts1_3    | -1647.862340     | -1647.305094     | 0.50105   |
|                              | REDO_f_7_ts1_4    | -1647.862340     | -1647.305090     | 0.49895   |
|                              | Weighted          |                  | -1647.305092     |           |
| open TS ( <b>1a + 4a</b> )   | REDO_f_7_ts1      | -1647.861751     | -1647.305283     | 0.93263   |
|                              | REDO_f_17_ts1     | -1647.858594     | -1647.302702     | 0.06042   |
|                              | REDO_f_7_ts1_rts1 | -1647.855823     | -1647.300662     | 0.00695   |
|                              | Weighted          |                  | -1647.305095     |           |
| <b>A</b>                     | REDO_f_1          | -1647.858990     | -1647.304095     | 0.13647   |
|                              | REDO_f_2          | -1647.855015     | -1647.299492     | 0.00104   |
|                              | REDO_f_7          | -1647.861878     | -1647.305629     | 0.69409   |
|                              | REDO_f_8          | -1647.848235     | -1647.293747     | 0.00000   |
|                              | REDO_f_9          | -1647.856407     | -1647.299075     | 0.00067   |
|                              | REDO_f_17         | -1647.856922     | -1647.301943     | 0.01394   |
|                              | REDO_f_18         | -1647.853827     | -1647.298735     | 0.00046   |
|                              | REDO_f_19         | -1647.853227     | -1647.297666     | 0.00015   |
|                              | REDO_f_22         | -1647.857732     | -1647.304195     | 0.15168   |
|                              | REDO_f_7_rot_4    | -1647.860752     | -1647.299837     | 0.00150   |
| Weighted                     |                   | -1647.305127     |                  |           |
| <b>B</b>                     | REDO_h_2          | -1647.885454     | -1647.322526     | 0.00673   |
|                              | REDO_h_3          | -1647.886739     | -1647.323083     | 0.01216   |
|                              | REDO_h_7          | -1647.881870     | -1647.318721     | 0.00012   |
|                              | REDO_h_9          | -1647.881089     | -1647.318037     | 0.00006   |
|                              | REDO_h_12         | -1647.882520     | -1647.321155     | 0.00157   |
|                              | REDO_h_13         | -1647.880806     | -1647.319244     | 0.00021   |
|                              | REDO_f_5          | -1647.889663     | -1647.327218     | 0.97456   |
|                              | REDO_f_6          | -1647.884739     | -1647.322164     | 0.00459   |
| Weighted                     |                   | -1647.327100     |                  |           |
| TS ( <b>A to C</b> )         | f_7_cp_ts1        | -1647.860941     | -1647.305651     | 0.97847   |

|                         |                       |              |              |         |
|-------------------------|-----------------------|--------------|--------------|---------|
|                         | f_17_cp_ts1           | -1647.856428 | -1647.302052 | 0.02153 |
|                         | Weighted              |              | -1647.305574 |         |
| TS (A to <i>cis</i> -C) | REDO_f_17_rot_fr_ts1  | -1647.854669 | -1647.299849 | 0.28765 |
|                         | REDO_f_7_rot_fr_ts1_2 | -1647.860524 | -1647.300704 | 0.71235 |
|                         | Weighted              |              | -1647.300458 |         |
| TS (B to C)             | pes_h_2_190_230_ts1   | -1647.865729 | -1647.310562 | 0.88559 |
|                         | REDO_h_3_fr_ts1       | -1647.861544 | -1647.304875 | 0.00213 |
|                         | REDO_h_7_fr_ts1       | -1647.861271 | -1647.307534 | 0.03573 |
|                         | REDO_f_5_fr_ts1       | -1647.865910 | -1647.308252 | 0.07654 |
|                         | Weighted              |              | -1647.310265 |         |
| C                       | REDO_trans_c_1        | -1538.495054 | -1537.942677 | 0.00135 |
|                         | REDO_trans_c_2        | -1538.500634 | -1537.948147 | 0.44635 |
|                         | REDO_trans_c_3        | -1538.497242 | -1537.946387 | 0.06905 |
|                         | REDO_trans_c_6        | -1538.495077 | -1537.945425 | 0.02492 |
|                         | REDO_trans_c_10       | -1538.500634 | -1537.948152 | 0.44873 |
|                         | REDO_trans_c_11       | -1538.494701 | -1537.944524 | 0.00959 |
|                         | Weighted              |              | -1537.947917 |         |
| <i>cis</i> -C           | REDO_g_1              | -1538.486880 | -1537.934050 | 0.00003 |
|                         | REDO_g_3              | -1538.496483 | -1537.943634 | 0.78235 |
|                         | REDO_g_4              | -1538.484624 | -1537.932861 | 0.00001 |
|                         | REDO_g_5              | -1538.494604 | -1537.941277 | 0.06429 |
|                         | REDO_g_6              | -1538.484286 | -1537.932877 | 0.00001 |
|                         | REDO_g_7              | -1538.492713 | -1537.940099 | 0.01845 |
|                         | REDO_g_8              | -1538.494607 | -1537.941976 | 0.13486 |
|                         | Weighted              |              | -1537.943193 |         |

|                                          |        |        |
|------------------------------------------|--------|--------|
| $\Delta G^\ddagger$ (cyclic TS)          | 79.7   | kJ/mol |
| $\Delta G^\ddagger$ (open TS)            | 79.7   | kJ/mol |
| $\Delta_r G^0$ (A)                       | 79.6   | kJ/mol |
| $\Delta_r G^0$ (B)                       | 21.9   | kJ/mol |
| $\Delta G^\ddagger$ (A to C)             | 78.4   | kJ/mol |
| $\Delta G^\ddagger$ (A to <i>cis</i> -C) | 91.8   | kJ/mol |
| $\Delta G^\ddagger$ (B to C)             | 66.1   | kJ/mol |
| $\Delta_r G^0$ (C)                       | -158.1 | kJ/mol |
| $\Delta_r G^0$ ( <i>cis</i> -C)          | -145.7 | kJ/mol |

Table S16.

| <b>1a + 6a (Si attack)</b>              |                       |                  |              |           |
|-----------------------------------------|-----------------------|------------------|--------------|-----------|
|                                         | Filename              | $E_{\text{tot}}$ | $G_{298}$    | Weighting |
| <b>1a</b>                               | REDO_1a_1             | -1037.381312     | -1037.007311 | 0.42631   |
|                                         | REDO_1a_2             | -1037.382784     | -1037.007301 | 0.42156   |
|                                         | REDO_1a_4             | -1037.376233     | -1037.006339 | 0.15213   |
|                                         | Weighted              |                  | -1037.007159 |           |
| <b>6a</b>                               | REDO_3a_1             | -379.564956      | -379.482241  |           |
| Nitrogen                                | nitrogen              | -109.434977      | -109.447736  |           |
| cyclic TS ( <b>1a</b> + <b>6a</b> , Si) | REDO_a_ss_7_ts1_rts_1 | -1416.942942     | -1416.464017 | 0.06749   |
|                                         | REDO_a_ss_7_ts1_rts_2 | -1416.946195     | -1416.466494 | 0.93251   |
|                                         | Weighted              |                  | -1416.466326 |           |
| open TS ( <b>1a</b> + <b>6a</b> , Si)   | REDO_a_ss_5_ts1       | -1416.933741     | -1416.454867 | 0.00002   |
|                                         | REDO_a_ss_7_ts1       | -1416.943418     | -1416.464910 | 0.99079   |
|                                         | REDO_REDO_a_ss_54_ts1 | -1416.936190     | -1416.457283 | 0.00030   |
|                                         | REDO_REDO_a_ss_56_ts1 | -1416.934600     | -1416.455893 | 0.00007   |
|                                         | REDO_REDO_a_ss_57_ts1 | -1416.940983     | -1416.460456 | 0.00881   |
| Weighted                                |                       | -1416.464868     |              |           |
| <b>A''</b>                              | REDO_a_ss_1           | -1416.946507     | -1416.466094 | 0.01663   |
|                                         | REDO_a_ss_2           | -1416.941796     | -1416.463487 | 0.00105   |
|                                         | REDO_a_ss_3           | -1416.941779     | -1416.463348 | 0.00090   |
|                                         | REDO_a_ss_4           | -1416.943406     | -1416.463556 | 0.00113   |
|                                         | REDO_a_ss_6           | -1416.940895     | -1416.458561 | 0.00001   |
|                                         | REDO_a_ss_7           | -1416.948239     | -1416.469886 | 0.92616   |
|                                         | REDO_a_ss_8           | -1416.945209     | -1416.465370 | 0.00771   |
|                                         | REDO_a_ss_9           | -1416.938977     | -1416.461190 | 0.00009   |
|                                         | REDO_a_ss_11          | -1416.939364     | -1416.460517 | 0.00004   |
|                                         | REDO_a_ss_12          | -1416.942668     | -1416.462569 | 0.00040   |
|                                         | REDO_a_ss_14          | -1416.946508     | -1416.466079 | 0.01636   |
|                                         | REDO_a_ss_20_2        | -1416.943753     | -1416.465220 | 0.00658   |
|                                         | REDO_a_ss_27          | -1416.943330     | -1416.462887 | 0.00055   |
|                                         | REDO_a_ss_56          | -1416.939506     | -1416.461668 | 0.00015   |
|                                         | REDO_a_ss_57          | -1416.945506     | -1416.466368 | 0.02224   |
| Weighted                                |                       | -1416.469588     |              |           |
| <b>B''</b>                              | d_sss_jj_prod         | -1416.968736     | -1416.473996 | 0.00006   |
|                                         | REDO_d_sss_2          | -1416.967404     | -1416.479118 | 0.01279   |
|                                         | REDO_d_sss_4_2        | -1416.967104     | -1416.480721 | 0.07001   |
|                                         | REDO_d_sss_5          | -1416.966000     | -1416.480559 | 0.05893   |



|                                      |                                       |              |              |         |
|--------------------------------------|---------------------------------------|--------------|--------------|---------|
|                                      | REDO_d_sss_7                          | -1416.968657 | -1416.483084 | 0.85768 |
|                                      | REDO_d_sss_8                          | -1416.963138 | -1416.474981 | 0.00016 |
|                                      | REDO_d_sss_9                          | -1416.962810 | -1416.475792 | 0.00038 |
|                                      | Weighted                              |              | -1416.482715 |         |
| TS (A'' to <i>trans</i> -C'')        | a_ss_12_cp_ts1                        | -1416.941836 | -1416.464674 | 0.00354 |
|                                      | a_ss_20_cp_ts1                        | -1416.942141 | -1416.465826 | 0.01199 |
|                                      | a_ss_7_cp_ts1                         | -1416.946475 | -1416.469966 | 0.96578 |
|                                      | REDO_REDO_a_ss_54_frozen              | -1416.944526 | -1416.465438 | 0.00795 |
|                                      | REDO_REDO_a_ss_57_frozen              | -1416.944199 | -1416.465723 | 0.01075 |
|                                      | Weighted                              |              | -1416.469816 |         |
| TS (B'' to <i>cis</i> -C'')          | pes_d_endo_233_187_ts1                | -1416.945469 | -1416.464190 | 0.08269 |
|                                      | REDO_d_sss_4_n2_ts1                   | -1416.945108 | -1416.466209 | 0.70310 |
|                                      | REDO_d_sss_5_n2_ts1                   | -1416.944246 | -1416.464463 | 0.11048 |
|                                      | REDO_d_sss_9_n2_ts1                   | -1416.940728 | -1416.464404 | 0.10373 |
|                                      | Weighted                              |              | -1416.465662 |         |
| TS (B'' to D)                        | pes_d_endo_233_187_ts1_cshif<br>t_ts1 | -1307.529251 | -1307.056030 | 0.01714 |
|                                      | REDO_d_sss_4_n2_ts1_cshift_ts<br>1    | -1307.531369 | -1307.059849 | 0.98286 |
|                                      | Weighted                              |              | -1307.059784 |         |
| <i>cis</i> -C'' = <i>cis</i> -C'     | REDO_6_srs_2                          | -1307.571325 | -1307.096561 | 0.04083 |
|                                      | REDO_6_srs_3                          | -1307.577054 | -1307.098066 | 0.20138 |
|                                      | REDO_6_srs_8                          | -1307.570884 | -1307.094802 | 0.00632 |
|                                      | REDO_6_srs_9                          | -1307.570159 | -1307.096270 | 0.03001 |
|                                      | REDO_6_ssr_1                          | -1307.575624 | -1307.099195 | 0.66640 |
|                                      | REDO_6_ssr_5                          | -1307.573669 | -1307.096797 | 0.05245 |
|                                      | REDO_6_ssr_6                          | -1307.569918 | -1307.093965 | 0.00260 |
|                                      | Weighted                              |              | -1307.098605 |         |
| <i>trans</i> -C'' = <i>trans</i> -C' | REDO_6_trans_1                        | -1307.579078 | -1307.103246 | 0.56631 |
|                                      | REDO_6_trans_2                        | -1307.579099 | -1307.102764 | 0.33959 |
|                                      | REDO_6_trans_3                        | -1307.576343 | -1307.100887 | 0.04644 |
|                                      | REDO_6_trans_4                        | -1307.576169 | -1307.098984 | 0.00618 |
|                                      | REDO_6_trans_8                        | -1307.576168 | -1307.099021 | 0.00642 |
|                                      | REDO_6_trans_9                        | -1307.572932 | -1307.100622 | 0.03506 |
|                                      | Weighted                              |              | -1307.102828 |         |
| D                                    | REDO_b_2                              | -1307.585962 | -1307.111155 | 0.51892 |
|                                      | REDO_b_3                              | -1307.583624 | -1307.109812 | 0.12483 |
|                                      | REDO_b_4                              | -1307.585262 | -1307.110427 | 0.23970 |

|          |              |              |         |
|----------|--------------|--------------|---------|
| REDO_b_5 | -1307.584096 | -1307.108638 | 0.03598 |
| REDO_b_6 | -1307.581449 | -1307.106698 | 0.00460 |
| REDO_b_7 | -1307.582839 | -1307.109185 | 0.06422 |
| REDO_b_8 | -1307.583785 | -1307.104616 | 0.00051 |
| REDO_b_9 | -1307.581240 | -1307.107541 | 0.01124 |
| Weighted |              | -1307.110531 |         |

|                                                        |        |        |
|--------------------------------------------------------|--------|--------|
| $\Delta G^\ddagger$ (Si, cyclic TS)                    | 52.7   | kJ/mol |
| $\Delta G^\ddagger$ (Si, open TS)                      | 56.5   | kJ/mol |
| $\Delta_r G^0$ ( <b>A''</b> )                          | 44.1   | kJ/mol |
| $\Delta_r G^0$ ( <b>B''</b> )                          | 9.6    | kJ/mol |
| $\Delta G^\ddagger$ ( <b>A''</b> to <i>trans-C''</i> ) | 43.5   | kJ/mol |
| $\Delta G^\ddagger$ ( <b>B''</b> to <i>cis-C''</i> )   | 54.4   | kJ/mol |
| $\Delta G^\ddagger$ ( <b>B''</b> to <b>D</b> )         | -55.5  | kJ/mol |
| $\Delta_r G^0$ ( <i>cis-C''</i> )                      | -157.4 | kJ/mol |
| $\Delta_r G^0$ ( <i>trans-C''</i> )                    | -168.5 | kJ/mol |
| $\Delta_r G^0$ ( <b>D</b> )                            | -188.7 | kJ/mol |

Note: The conversion of **B''** to *cis-C''* and **D** proceeds via dissociation of nitrogen and a subsequent rearrangement in a flat region of the potential energy surface. A transition state for the aryl shift (conversion to **D**) could be located by completely dissociating nitrogen from the end point of the IRC calculation (see Figure below) which is accordingly highly negative (-55.5 kJ/mol).

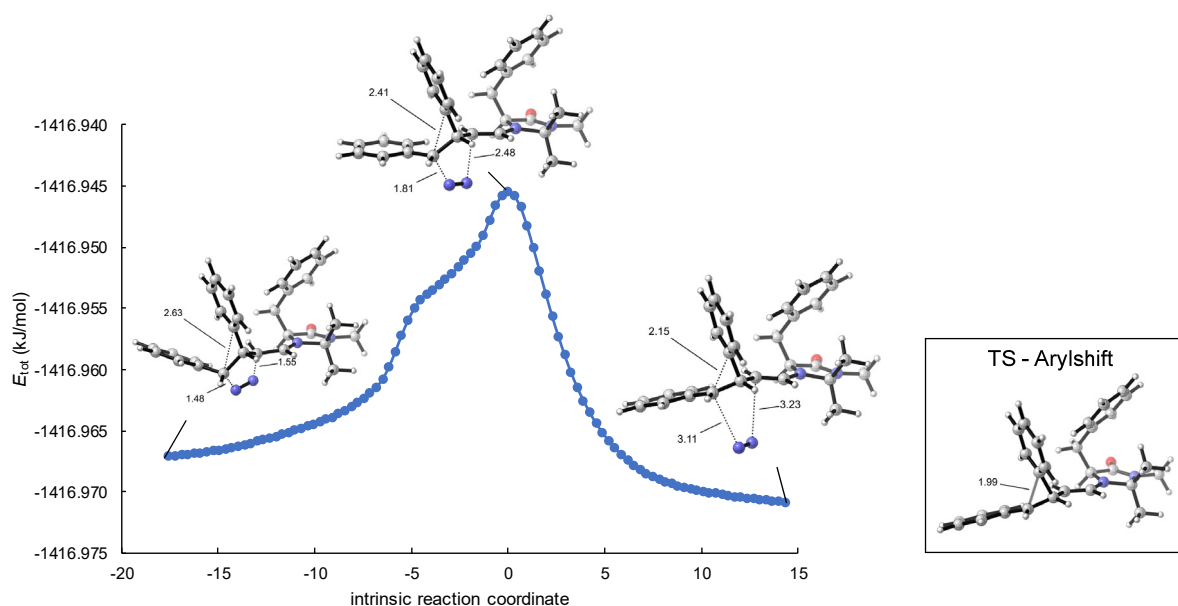

Table S17.

| 1a + 6a (Re attack)                     |                         |                  |              |           |  |
|-----------------------------------------|-------------------------|------------------|--------------|-----------|--|
|                                         | Filename                | $E_{\text{tot}}$ | $G_{298}$    | Weighting |  |
| <b>1a</b>                               | REDO_1a_1               | -1037.381312     | -1037.007311 | 0.42631   |  |
|                                         | REDO_1a_2               | -1037.382784     | -1037.007301 | 0.42156   |  |
|                                         | REDO_1a_4               | -1037.376233     | -1037.006339 | 0.15213   |  |
|                                         | Weighted                |                  | -1037.007159 |           |  |
| <b>6a</b>                               | REDO_3a_1               | -379.564956      | -379.482241  |           |  |
| Nitrogen                                | nitrogen                | -109.434977      | -109.447736  |           |  |
| cyclic TS ( <b>1a</b> + <b>6a</b> , Re) | REDO_a_sr_5_ts1_rts1    | -1416.944276     | -1416.462804 | 0.644938  |  |
|                                         | REDO_a_sr_17_ts1_rts1_2 | -1416.939845     | -1416.460198 | 0.040689  |  |
|                                         | REDO_a_sr_19_cts1       | -1416.941174     | -1416.462127 | 0.31437   |  |
|                                         | Weighted                |                  | -1416.462485 |           |  |
| open TS ( <b>1a</b> + <b>6a</b> , Re)   | REDO_a_sr_3_ts1         | -1416.939334     | -1416.459932 | 0.00316   |  |
|                                         | REDO_a_sr_5_ts1         | -1416.943321     | -1416.464865 | 0.59068   |  |
|                                         | REDO_a_sr_5_ts1_rts3_2  | -1416.942561     | -1416.463975 | 0.23004   |  |
|                                         | REDO_a_sr_7_ts1         | -1416.934147     | -1416.456684 | 0.000101  |  |
|                                         | REDO_a_sr_14_ts1        | -1416.935247     | -1416.454869 | 0.000015  |  |
|                                         | REDO_a_sr_17_ts1        | -1416.939429     | -1416.459772 | 0.002670  |  |
|                                         | REDO_a_sr_17_ts1_rts2   | -1416.940338     | -1416.462752 | 0.062875  |  |
|                                         | REDO_a_sr_20_cts1       | -1416.939463     | -1416.459571 | 0.002158  |  |
|                                         | REDO_a_sr_34_fr_ts1     | -1416.942674     | -1416.463265 | 0.108303  |  |
|                                         | Weighted                |                  | -1416.464312 |           |  |
| <b>A'</b>                               | REDO_a_sr_3             | -1416.945311     | -1416.464163 | 0.025129  |  |
|                                         | REDO_a_sr_5             | -1416.945975     | -1416.464695 | 0.044175  |  |
|                                         | REDO_a_sr_5_rot1        | -1416.945433     | -1416.466972 | 0.493623  |  |
|                                         | REDO_a_sr_6             | -1416.941133     | -1416.461979 | 0.002480  |  |
|                                         | REDO_a_sr_7             | -1416.936251     | -1416.457079 | 0.000014  |  |
|                                         | REDO_a_sr_9             | -1416.942351     | -1416.461471 | 0.001448  |  |
|                                         | REDO_a_sr_10            | -1416.935491     | -1416.455753 | 0.000003  |  |
|                                         | REDO_a_sr_14            | -1416.939132     | -1416.458895 | 0.000094  |  |
|                                         | REDO_a_sr_16            | -1416.942929     | -1416.461273 | 0.001173  |  |
|                                         | REDO_a_sr_17            | -1416.941395     | -1416.466070 | 0.189745  |  |
|                                         | REDO_a_sr_18            | -1416.933364     | -1416.455116 | 0.000002  |  |
|                                         | REDO_a_sr_23            | -1416.939874     | -1416.459852 | 0.000260  |  |
|                                         | REDO_a_sr_34            | -1416.945502     | -1416.466225 | 0.223554  |  |
|                                         | REDO_a_sr_35            | -1416.941375     | -1416.463240 | 0.009440  |  |
|                                         | REDO_a_sr_54            | -1416.940913     | -1416.460784 | 0.000699  |  |
|                                         | REDO_a_sr_58            | -1416.944281     | -1416.463062 | 0.007816  |  |

|                      |                              |              |              |          |
|----------------------|------------------------------|--------------|--------------|----------|
|                      | REDO_a_sr_94_freq            | -1416.940923 | -1416.460061 | 0.000325 |
|                      | REDO_a_sr_97                 | -1416.935056 | -1416.457364 | 0.000019 |
|                      | Weighted                     |              | -1416.466360 |          |
| <b>B'</b>            | REDO_6_si_srs_2              | -1416.969927 | -1416.483081 | 0.76608  |
|                      | REDO_6_si_srs_4              | -1416.968484 | -1416.479834 | 0.02449  |
|                      | REDO_6_si_srs_5              | -1416.967711 | -1416.480101 | 0.03251  |
|                      | REDO_6_si_srs_6              | -1416.964355 | -1416.476538 | 0.00074  |
|                      | REDO_6_si_srs_7              | -1416.963314 | -1416.475622 | 0.00028  |
|                      | REDO_6_si_srs_8              | -1416.963666 | -1416.477679 | 0.00249  |
|                      | REDO_6_si_srs_9              | -1416.965314 | -1416.476472 | 0.00069  |
|                      | REDO_6_si_srs_10             | -1416.964176 | -1416.479695 | 0.02113  |
|                      | REDO_6_si_srs_11             | -1416.961615 | -1416.477273 | 0.00162  |
|                      | REDO_6_si_srs_12             | -1416.962338 | -1416.476624 | 0.00081  |
|                      | REDO_6_si_srs_13             | -1416.968162 | -1416.479496 | 0.01711  |
|                      | REDO_a_sr_2                  | -1416.965572 | -1416.476312 | 0.00059  |
|                      | REDO_a_sr_4                  | -1416.966432 | -1416.480907 | 0.07636  |
|                      | REDO_a_sr_19_2               | -1416.965899 | -1416.480599 | 0.05508  |
|                      | Weighted                     |              | -1416.482426 |          |
| TS (A' to trans-C')  | REDO_a_sr_5_rot1_cp_ts1_4    | -1416.942622 | -1416.463733 | 1.00000  |
|                      | Weighted                     |              | -1416.463733 |          |
| TS (B' to cis-C')    | exo_pes_244_178_ts1          | -1416.950319 | -1416.470364 | 0.98338  |
|                      | REDO_6_si_srs_3_n2_ts1       | -1416.945109 | -1416.466513 | 0.01658  |
|                      | REDO_6_si_srs_9_n2_ts1       | -1416.943179 | -1416.460510 | 0.00003  |
|                      | REDO_6_si_srs_8_n2_ts1       | -1416.936458 | -1416.459654 | 0.00001  |
|                      | Weighted                     |              | -1416.470300 |          |
| TS: B' to D          | 6_si_srs_9_n2_ts1_cshift_ts1 | -1307.527351 | -1307.054465 | 1.00000  |
|                      | Weighted                     |              | -1307.054465 |          |
| cis-C'' = cis-C'     | REDO_6_srs_2                 | -1307.571325 | -1307.096561 | 0.04083  |
|                      | REDO_6_srs_3                 | -1307.577054 | -1307.098066 | 0.20138  |
|                      | REDO_6_srs_8                 | -1307.570884 | -1307.094802 | 0.00632  |
|                      | REDO_6_srs_9                 | -1307.570159 | -1307.096270 | 0.03001  |
|                      | REDO_6_ssr_1                 | -1307.575624 | -1307.099195 | 0.66640  |
|                      | REDO_6_ssr_5                 | -1307.573669 | -1307.096797 | 0.05245  |
|                      | REDO_6_ssr_6                 | -1307.569918 | -1307.093965 | 0.00260  |
|                      | Weighted                     |              | -1307.098605 |          |
| trans-C'' = trans-C' | REDO_6_trans_1               | -1307.579078 | -1307.103246 | 0.56631  |
|                      | REDO_6_trans_2               | -1307.579099 | -1307.102764 | 0.33959  |
|                      | REDO_6_trans_3               | -1307.576343 | -1307.100887 | 0.04644  |

|                |              |              |         |
|----------------|--------------|--------------|---------|
| REDO_6_trans_4 | -1307.576169 | -1307.098984 | 0.00618 |
| REDO_6_trans_8 | -1307.576168 | -1307.099021 | 0.00642 |
| REDO_6_trans_9 | -1307.572932 | -1307.100622 | 0.03506 |
| Weighted       |              | -1307.102828 |         |

**D**

|          |              |              |         |
|----------|--------------|--------------|---------|
| REDO_b_2 | -1307.585962 | -1307.111155 | 0.51892 |
| REDO_b_3 | -1307.583624 | -1307.109812 | 0.12483 |
| REDO_b_4 | -1307.585262 | -1307.110427 | 0.23970 |
| REDO_b_5 | -1307.584096 | -1307.108638 | 0.03598 |
| REDO_b_6 | -1307.581449 | -1307.106698 | 0.00460 |
| REDO_b_7 | -1307.582839 | -1307.109185 | 0.06422 |
| REDO_b_8 | -1307.583785 | -1307.104616 | 0.00051 |
| REDO_b_9 | -1307.581240 | -1307.107541 | 0.01124 |
| Weighted |              | -1307.110531 |         |

|                                                               |        |        |
|---------------------------------------------------------------|--------|--------|
| $\Delta G^\ddagger$ (Re, cyclic TS)                           | 62.8   | kJ/mol |
| $\Delta G^\ddagger$ (Re, open TS)                             | 58.0   | kJ/mol |
| $\Delta_r G^0$ ( <b>A'</b> )                                  | 52.6   | kJ/mol |
| $\Delta_r G^0$ ( <b>B'</b> )                                  | 10.4   | kJ/mol |
| $\Delta G^\ddagger$ ( <b>A'</b> to <i>trans</i> - <b>C'</b> ) | 59.5   | kJ/mol |
| $\Delta G^\ddagger$ ( <b>B'</b> to <i>cis</i> - <b>C'</b> )   | 42.2   | kJ/mol |
| $\Delta G^\ddagger$ ( <b>B'</b> to <b>D</b> )                 | -41.5  | kJ/mol |
| $\Delta_r G^0$ ( <i>cis</i> - <b>C'</b> )                     | -157.4 | kJ/mol |
| $\Delta_r G^0$ ( <i>trans</i> - <b>C'</b> )                   | -168.5 | kJ/mol |
| $\Delta_r G^0$ ( <b>D</b> )                                   | -188.7 | kJ/mol |

Note: Depending on the conformation of **B'**, nitrogen dissociation results in a flat PES from which either cyclopropanation or aryl shift occurs. While some IRC calculations from the cycloreversion TS directly yield the cyclopropane (see Figure below), a transition state for the aryl shift (conversion to **D**) could only be located by completely dissociating nitrogen from the end point of the IRC calculation (see Figure below) which is accordingly highly negative (-41.5 kJ/mol).

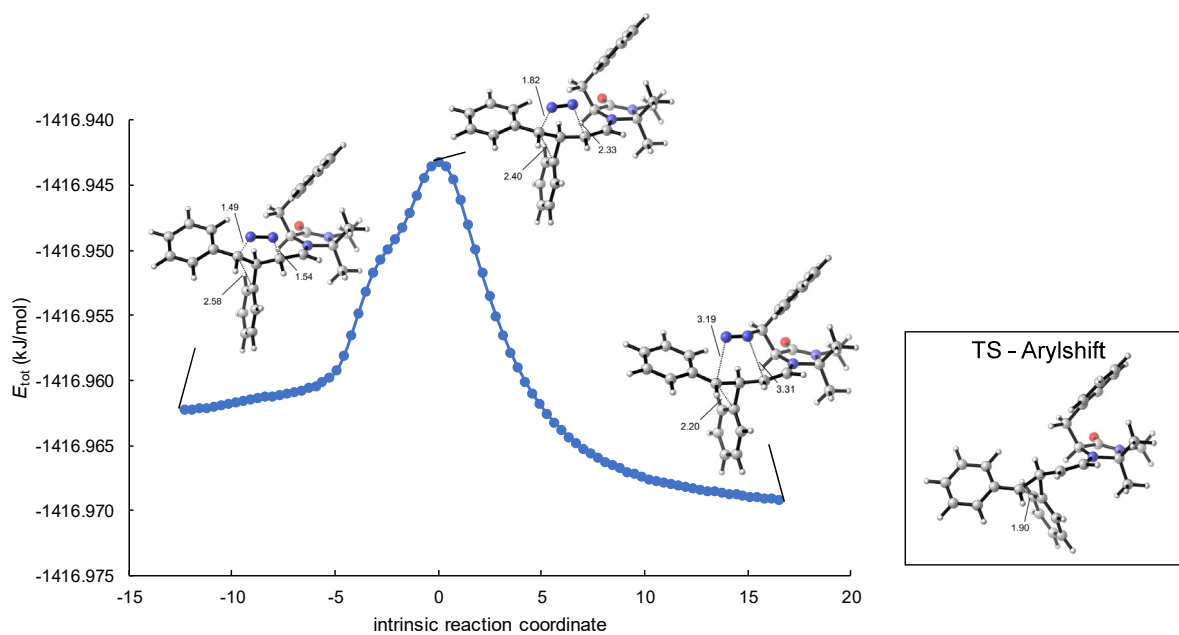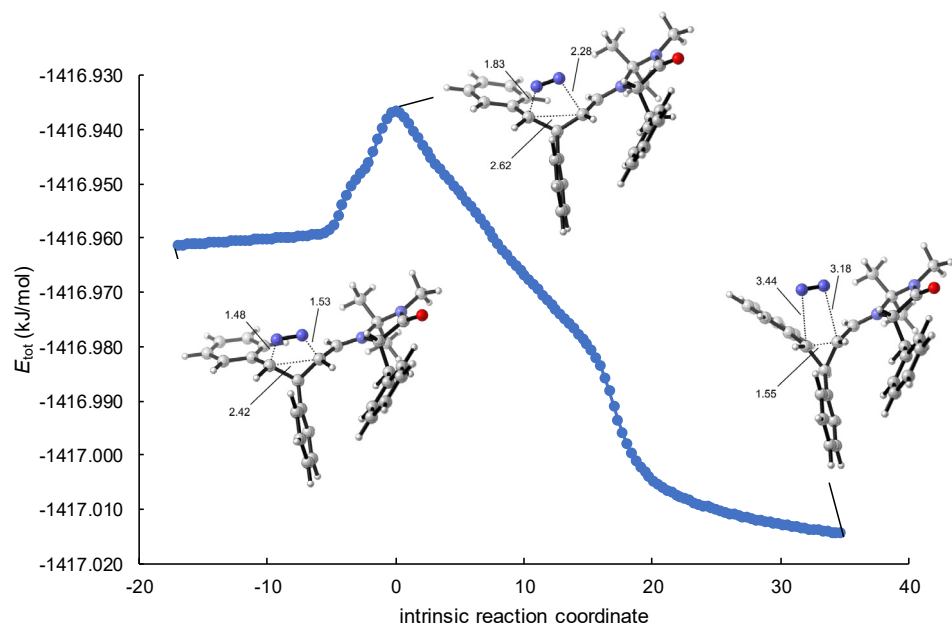

Table S18.

| <b>D + 6a (Si attack)</b>       |                       |                  |              |              |         |
|---------------------------------|-----------------------|------------------|--------------|--------------|---------|
|                                 | Filename              | $E_{\text{tot}}$ | $G_{298}$    | Weighting    |         |
| <b>D</b>                        | REDO_b_2              | -1307.585962     | -1307.111155 | 0.51850      |         |
|                                 | REDO_b_3              | -1307.583624     | -1307.109812 | 0.12473      |         |
|                                 | REDO_b_4              | -1307.585262     | -1307.110427 | 0.23951      |         |
|                                 | REDO_b_5              | -1307.584096     | -1307.108638 | 0.03595      |         |
|                                 | REDO_b_6              | -1307.581449     | -1307.106698 | 0.00460      |         |
|                                 | REDO_b_7              | -1307.582839     | -1307.109185 | 0.06417      |         |
|                                 | REDO_b_8              | -1307.583785     | -1307.104616 | 0.00051      |         |
|                                 | REDO_b_9              | -1307.581240     | -1307.107541 | 0.01123      |         |
|                                 | REDO_b_10             | -1307.581628     | -1307.105046 | 0.00080      |         |
|                                 |                       | Weighted         |              | -1307.110527 |         |
| <b>6a</b>                       | REDO_3a_1             | -379.564956      | -379.482241  |              |         |
| Nitrogen                        | nitrogen              | -109.434977      | -109.447736  |              |         |
| cyclic TS ( <b>D + 6a</b> , Si) | REDO_si_c_17_ts1_rts1 | -1687.158204     | -1686.576126 | 1.00000      |         |
|                                 | Weighted              |                  | -1686.576126 |              |         |
| open TS ( <b>D + 6a</b> , Si)   | REDO_si_c_17_ts1      | -1687.154666     | -1686.572887 | 0.99833      |         |
|                                 | REDO_si_c_18_fr_ts1   | -1687.149706     | -1686.566855 | 0.00167      |         |
|                                 | Weighted              |                  | -1686.572877 |              |         |
| open IM (Si)                    | REDO_si_c_1           | -1687.161412     | -1686.580050 | 0.069458     |         |
|                                 | REDO_si_c_3           | -1687.156241     | -1686.570323 | 0.000002     |         |
|                                 | REDO_si_c_5           | -1687.151238     | -1686.568203 | 0.000000     |         |
|                                 | REDO_si_c_6           | -1687.150570     | -1686.570269 | 0.000002     |         |
|                                 | REDO_si_c_7           | -1687.150977     | -1686.567729 | 0.000000     |         |
|                                 | REDO_si_c_8           | -1687.156410     | -1686.573590 | 0.000074     |         |
|                                 | REDO_si_c_9           | -1687.156417     | -1686.574249 | 0.000148     |         |
|                                 | REDO_si_c_10          | -1687.159772     | -1686.575683 | 0.000678     |         |
|                                 | REDO_si_c_17          | -1687.164974     | -1686.582494 | 0.92750      |         |
|                                 | REDO_si_c_18          | -1687.158271     | -1686.575876 | 0.00083      |         |
|                                 | REDO_si_c_21          | -1687.158705     | -1686.576293 | 0.00129      |         |
|                                 | REDO_si_c_25          | -1687.157311     | -1686.571433 | 0.00001      |         |
|                                 | REDO_si_c_27          | -1687.153640     | -1686.570962 | 0.00000      |         |
|                                 | REDO_si_c_38          | -1687.151439     | -1686.567937 | 0.00000      |         |
|                                 |                       | Weighted         |              | -1686.582304 |         |
|                                 | cyclic IM (Si)        | REDO_2d_endo_1   | -1687.186117 | -1686.591830 | 0.02553 |
| REDO_2d_endo_2_2                |                       | -1687.185557     | -1686.595194 | 0.90303      |         |
| REDO_2d_endo_3                  |                       | -1687.182892     | -1686.592801 | 0.07144      |         |

|                                 |                             |              |              |         |
|---------------------------------|-----------------------------|--------------|--------------|---------|
|                                 | Weighted                    |              | -1686.594937 |         |
| TS (open IM to <i>trans</i> -E) | REDO_si_c_17_cts1           | -1687.164106 | -1686.582653 | 0.99848 |
|                                 | REDO_si_c_18_cts1           | -1687.157847 | -1686.576530 | 0.00151 |
|                                 | REDO_si_c_27_cts1           | -1687.153151 | -1686.571703 | 0.00001 |
|                                 | Weighted                    |              | -1686.582643 |         |
| TS (cyclic IM to <i>cis</i> -E) | pes_2d_endo_3_240_181_ts1_3 | -1687.158625 | -1686.574790 | 0.01041 |
|                                 | pes_2d_endo_1_239_185_ts1   | -1687.162053 | -1686.579086 | 0.98959 |
|                                 | Weighted                    |              | -1686.579041 |         |
| <i>cis</i> -E                   | REDO_5_cis_1                | -1577.792207 | -1577.214290 | 0.25631 |
|                                 | REDO_5_cis_4                | -1577.788090 | -1577.211066 | 0.00839 |
|                                 | REDO_REDO_5_cis_5           | -1577.791056 | -1577.212496 | 0.03822 |
|                                 | REDO_REDO_5_cis_6           | -1577.792207 | -1577.215229 | 0.69340 |
|                                 | REDO_REDO_5_cis_9           | -1577.788099 | -1577.210286 | 0.00367 |
|                                 | Weighted                    |              | -1577.214831 |         |
| <i>trans</i> -E                 | REDO_5_trans_1              | -1577.782102 | -1577.205274 | 0.00003 |
|                                 | REDO_5_trans_2              | -1577.793810 | -1577.214163 | 0.36499 |
|                                 | REDO_REDO_5_trans_5         | -1577.793451 | -1577.214091 | 0.33831 |
|                                 | REDO_REDO_5_trans_7         | -1577.793809 | -1577.213968 | 0.29667 |
|                                 | Weighted                    |              | -1577.214081 |         |

|                                                  |        |        |
|--------------------------------------------------|--------|--------|
| $\Delta G^\ddagger$ (Si, cyclic TS)              | 35.8   | kJ/mol |
| $\Delta G^\ddagger$ (Si, open TS)                | 44.3   | kJ/mol |
| $\Delta_r G^0$ (Si, open IM)                     | 19.6   | kJ/mol |
| $\Delta_r G^0$ (Si, cyclic IM)                   | -13.6  | kJ/mol |
| $\Delta G^\ddagger$ (open IM to <i>trans</i> -E) | 18.7   | kJ/mol |
| $\Delta G^\ddagger$ (cyclic IM to <i>cis</i> -E) | 28.1   | kJ/mol |
| $\Delta_r G^0$ ( <i>cis</i> -E)                  | -191.2 | kJ/mol |
| $\Delta_r G^0$ ( <i>trans</i> -E)                | -189.2 | kJ/mol |



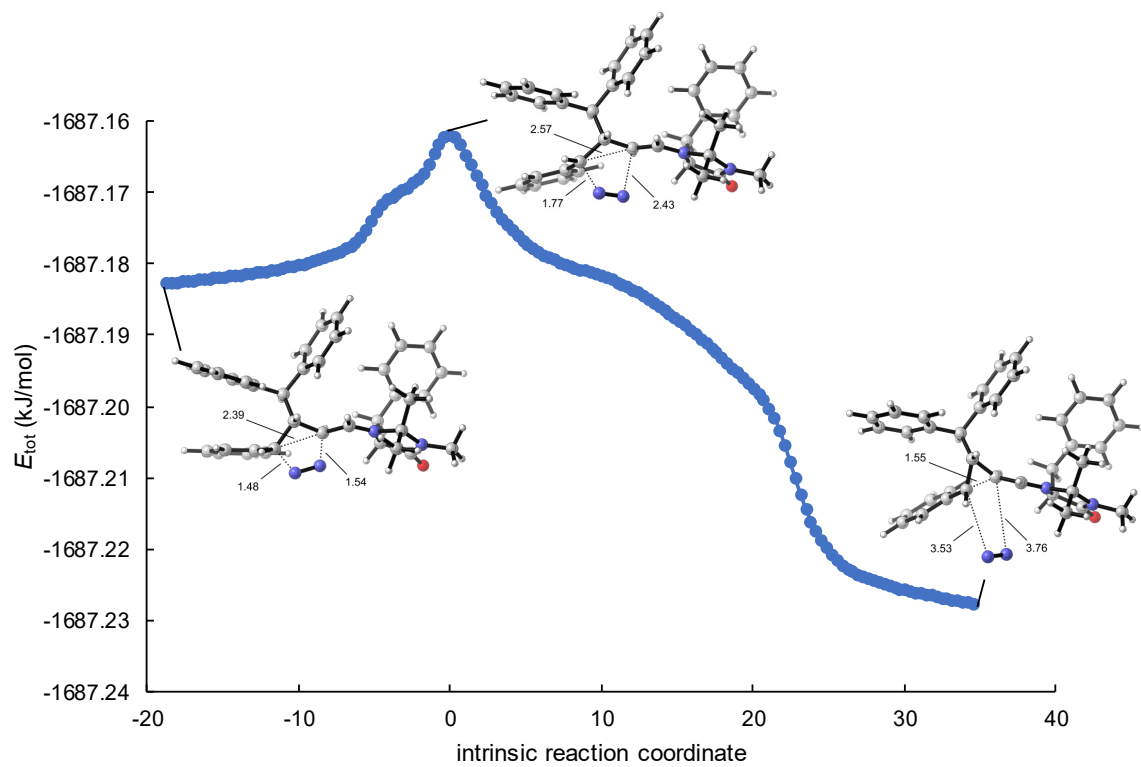

Table S19.

| <b>D + 6a (Re attack)</b>       |                          |                  |                  |              |
|---------------------------------|--------------------------|------------------|------------------|--------------|
|                                 | Filename                 | E <sub>tot</sub> | G <sub>298</sub> | Weighting    |
| <b>D</b>                        | REDO_b_2                 | -1307.585962     | -1307.111155     | 0.51850      |
|                                 | REDO_b_3                 | -1307.583624     | -1307.109812     | 0.12473      |
|                                 | REDO_b_4                 | -1307.585262     | -1307.110427     | 0.23951      |
|                                 | REDO_b_5                 | -1307.584096     | -1307.108638     | 0.03595      |
|                                 | REDO_b_6                 | -1307.581449     | -1307.106698     | 0.00460      |
|                                 | REDO_b_7                 | -1307.582839     | -1307.109185     | 0.06417      |
|                                 | REDO_b_8                 | -1307.583785     | -1307.104616     | 0.00051      |
|                                 | REDO_b_9                 | -1307.581240     | -1307.107541     | 0.01123      |
|                                 | REDO_b_10                | -1307.581628     | -1307.105046     | 0.00080      |
|                                 |                          | Weighted         |                  | -1307.110527 |
| <b>6a</b>                       | REDO_3a_1                | -379.564956      | -379.482241      |              |
| Nitrogen                        | nitrogen                 | -109.434977      | -109.447736      |              |
| cyclic TS ( <b>D + 6a</b> , Re) | REDO_re_c_10_ts1_rts1    | -1687.154500     | -1686.573213     | 1.00000      |
|                                 | Weighted                 |                  | -1686.573213     |              |
| open TS ( <b>D + 6a</b> , Re)   | REDO_re_c_10_ts1         | -1687.152449     | -1686.570260     | 0.99861      |
|                                 | REDO_re_c_10_rot1_fr_ts1 | -1687.147597     | -1686.564057     | 0.00139      |
|                                 | Weighted                 |                  | -1686.570251     |              |
| open IM (Re)                    | REDO_re_c_1              | -1687.154400     | -1686.569959     | 0.00011      |
|                                 | REDO_re_c_4              | -1687.158644     | -1686.573880     | 0.00682      |
|                                 | REDO_re_c_5              | -1687.158636     | -1686.577974     | 0.52277      |
|                                 | REDO_re_c_8              | -1687.155525     | -1686.571213     | 0.00040      |
|                                 | REDO_re_c_10             | -1687.162607     | -1686.577872     | 0.46915      |
|                                 | REDO_re_c_15             | -1687.152938     | -1686.569078     | 0.00004      |
|                                 | REDO_re_c_16             | -1687.154763     | -1686.568940     | 0.00004      |
|                                 | REDO_re_c_20             | -1687.153720     | -1686.570928     | 0.00030      |
|                                 | REDO_re_c_10_rot1        | -1687.154659     | -1686.571175     | 0.00039      |
|                                 | REDO_re_c_20_rot1        | -1687.142954     | -1686.562199     | 0.00000      |
|                                 | Weighted                 |                  | -1686.577889     |              |
| cyclic IM (Re)                  | REDO_2d_exo_1            | -1687.185552     | -1686.594803     | 0.06848      |
|                                 | REDO_2d_exo_2            | -1687.186018     | -1686.594996     | 0.08401      |
|                                 | REDO_2d_exo_4            | -1687.185558     | -1686.594996     | 0.08405      |
|                                 | REDO_REDO_2d_exo_6       | -1687.184867     | -1686.597073     | 0.75975      |
|                                 | REDO_REDO_2d_exo_7       | -1687.181628     | -1686.588739     | 0.00011      |
|                                 | REDO_REDO_2d_exo_8       | -1687.180694     | -1686.590579     | 0.00078      |
|                                 | REDO_REDO_2d_exo_9       | -1687.183072     | -1686.591310     | 0.00169      |

|                         |                               |              |              |              |
|-------------------------|-------------------------------|--------------|--------------|--------------|
|                         | REDO_REDO_2d_exo_10           | -1687.181949 | -1686.590942 | 0.00114      |
|                         | Weighted                      |              | -1686.596546 |              |
| TS (open IM to trans-E) | REDO_re_c_10_rot1_cpts1       | -1687.151571 | -1686.569869 | 1.00000      |
|                         | Weighted                      |              | -1686.569869 |              |
| TS (cyclic IM to cis-E) | pes_2d_exo_2_240_181_ts1_freq | -1687.163765 | -1686.583919 | 0.99991      |
|                         | REDO_2d_exo_1_n2_ts1          | -1687.157723 | -1686.575144 | 0.00009      |
|                         | Weighted                      |              | -1686.583918 |              |
| cis-E                   | REDO_5_cis_1                  | -1577.792207 | -1577.214290 | 0.25631      |
|                         | REDO_5_cis_4                  | -1577.788090 | -1577.211066 | 0.00839      |
|                         | REDO_REDO_5_cis_5             | -1577.791056 | -1577.212496 | 0.03822      |
|                         | REDO_REDO_5_cis_6             | -1577.792207 | -1577.215229 | 0.69340      |
|                         | REDO_REDO_5_cis_9             | -1577.788099 | -1577.210286 | 0.00367      |
|                         | Weighted                      |              | -1577.214831 |              |
| trans-E                 | REDO_5_trans_1                | -1577.782102 | -1577.205274 | 0.00003      |
|                         | REDO_5_trans_2                | -1577.793810 | -1577.214163 | 0.36499      |
|                         | REDO_REDO_5_trans_5           | -1577.793451 | -1577.214091 | 0.33831      |
|                         | REDO_REDO_5_trans_7           | -1577.793809 | -1577.213968 | 0.29667      |
|                         |                               | Weighted     |              | -1577.214081 |

|                                                    |        |        |
|----------------------------------------------------|--------|--------|
| $\Delta G^\ddagger$ (Re, cyclic TS)                | 43.4   | kJ/mol |
| $\Delta G^\ddagger$ (Re, open TS)                  | 51.2   | kJ/mol |
| $\Delta_r G^0$ (Re, open IM)                       | 31.2   | kJ/mol |
| $\Delta_r G^0$ (Re, cyclic IM)                     | -17.8  | kJ/mol |
| $\Delta G^\ddagger$ (open IM to <i>cis</i> -E)     | 52.2   | kJ/mol |
| $\Delta G^\ddagger$ (cyclic IM to <i>trans</i> -E) | 15.3   | kJ/mol |
| $\Delta_r G^0$ ( <i>cis</i> -E)                    | -191.2 | kJ/mol |
| $\Delta_r G^0$ ( <i>trans</i> -E)                  | -189.2 | kJ/mol |

# 11. Copies of NMR Spectra

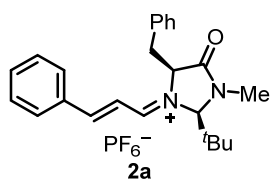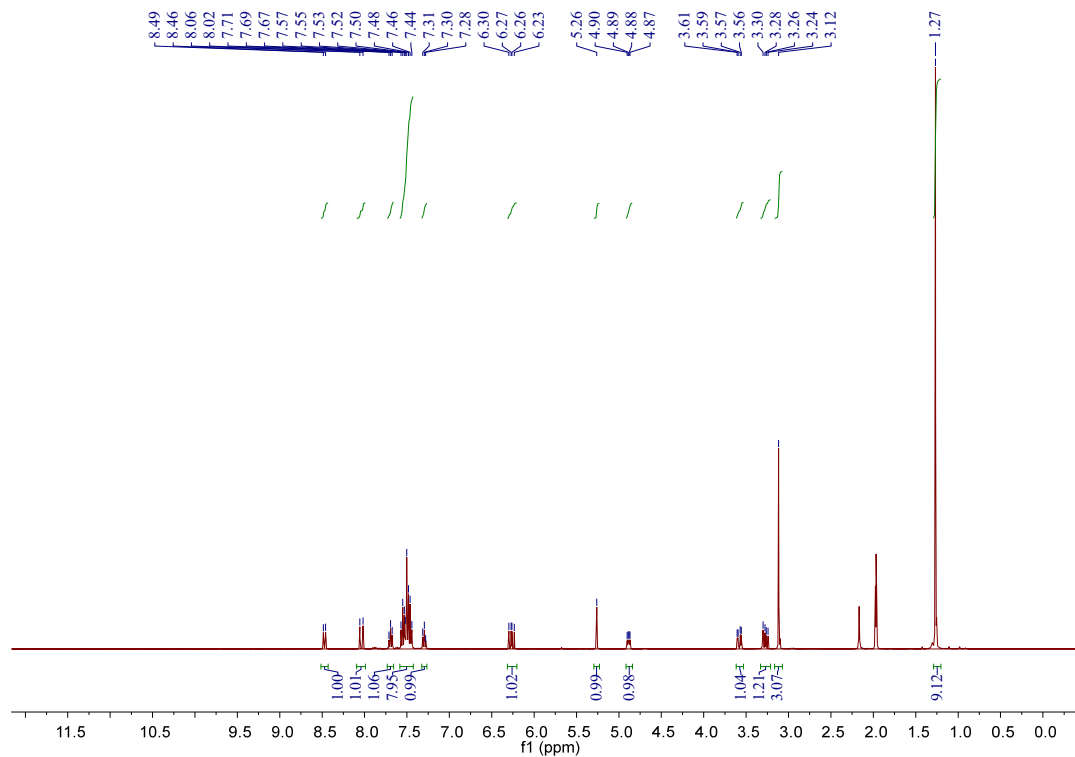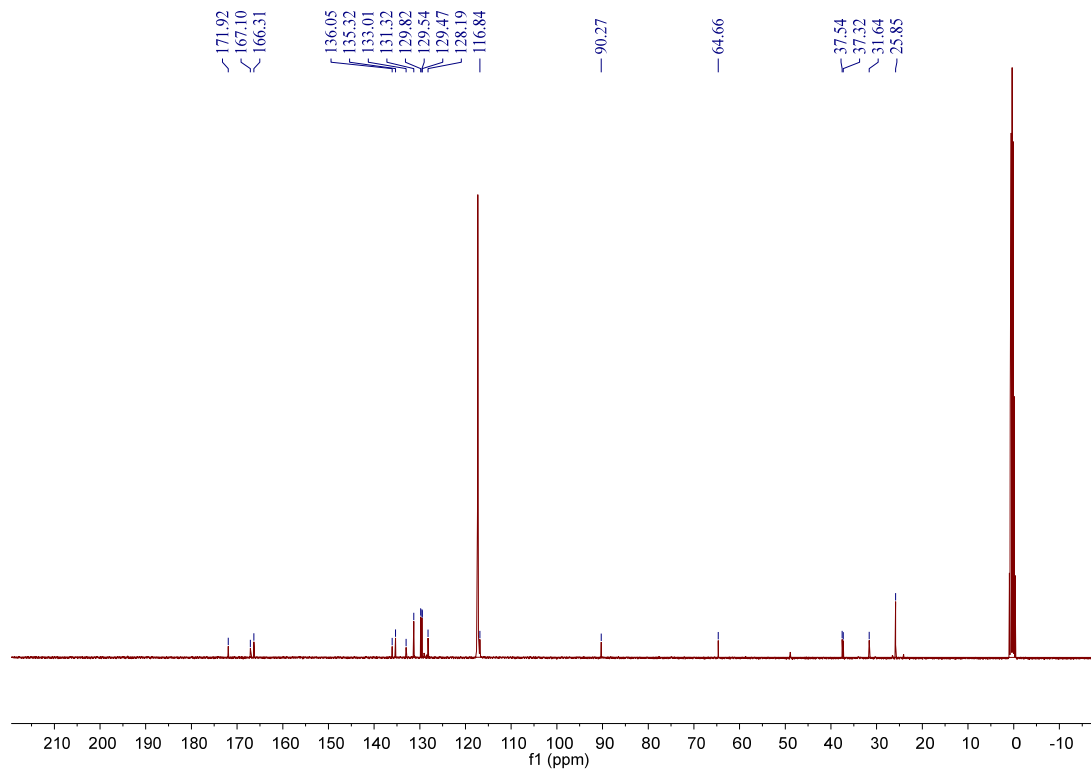

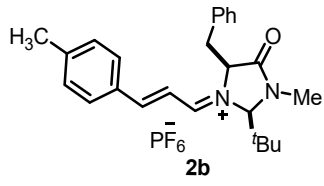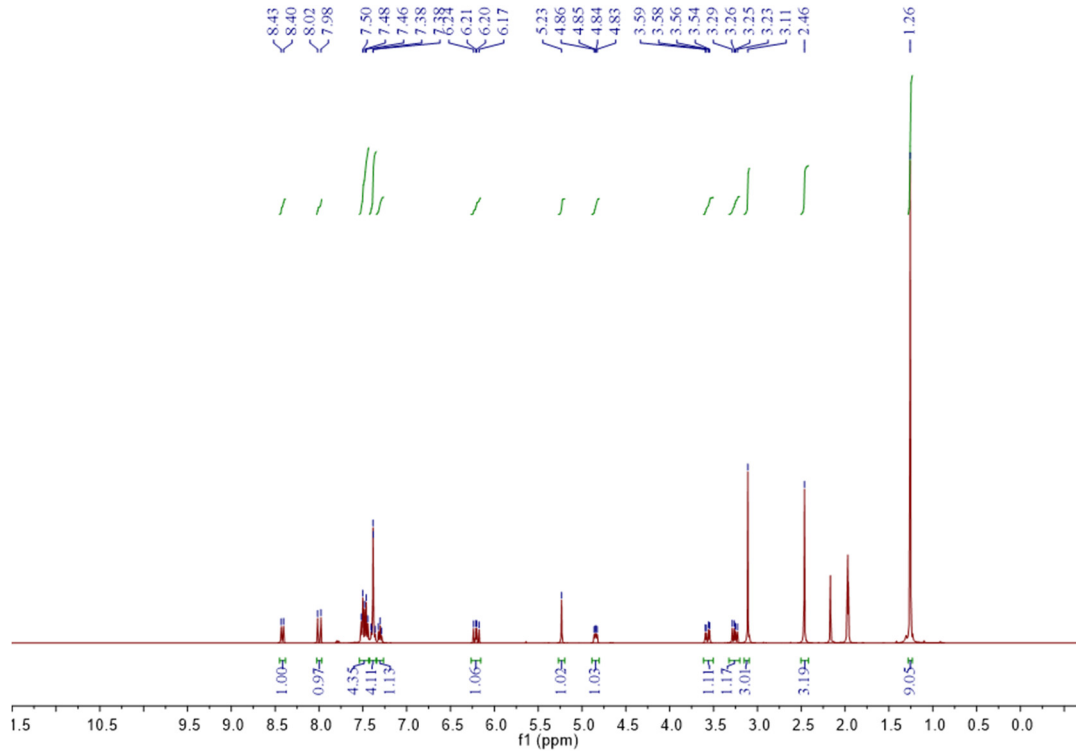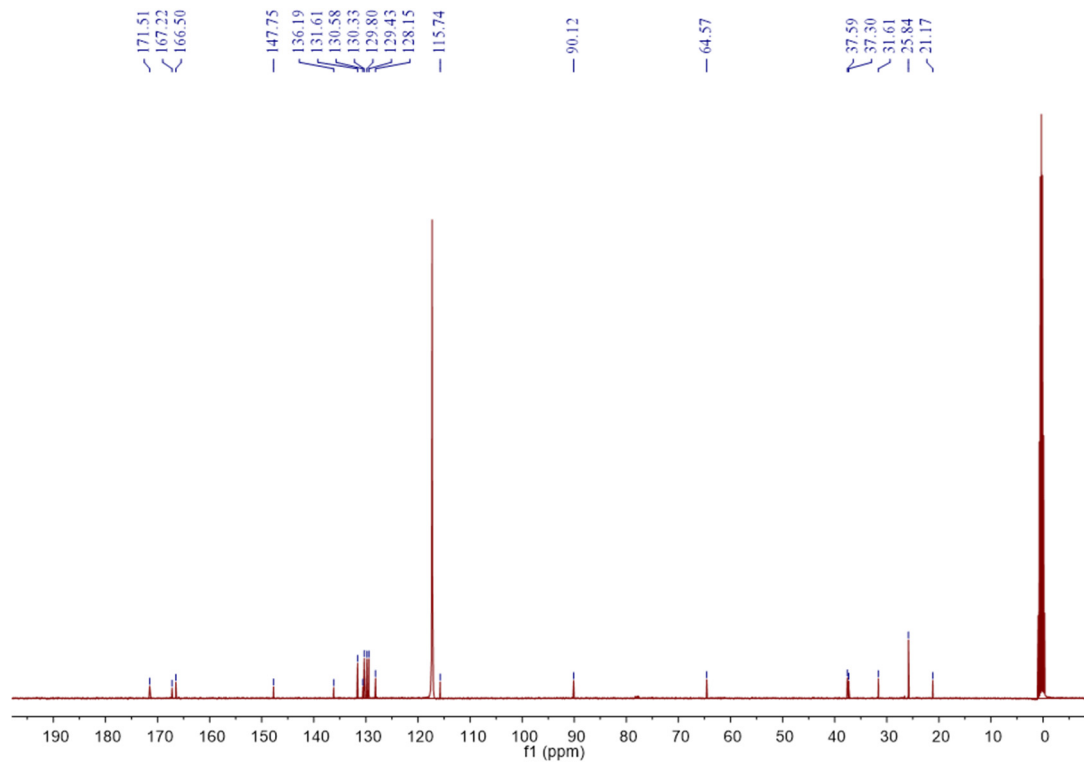

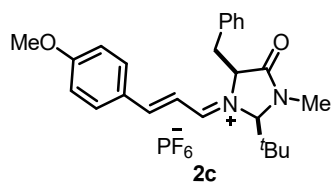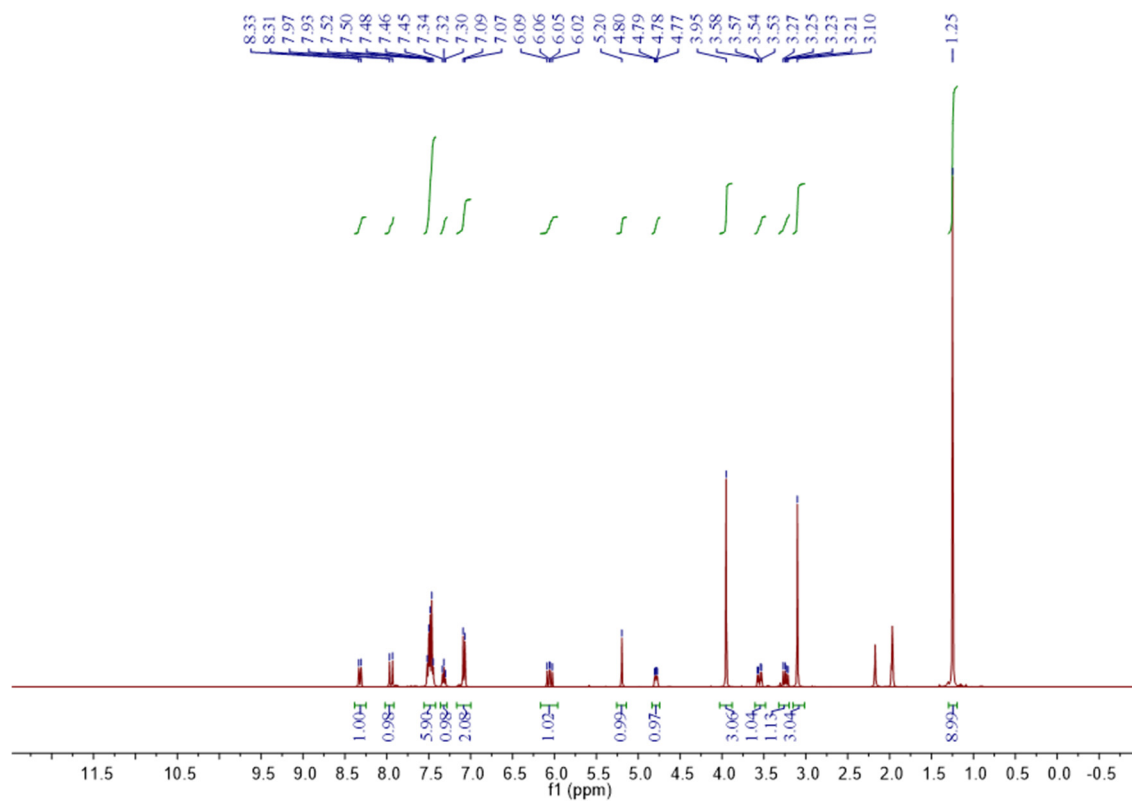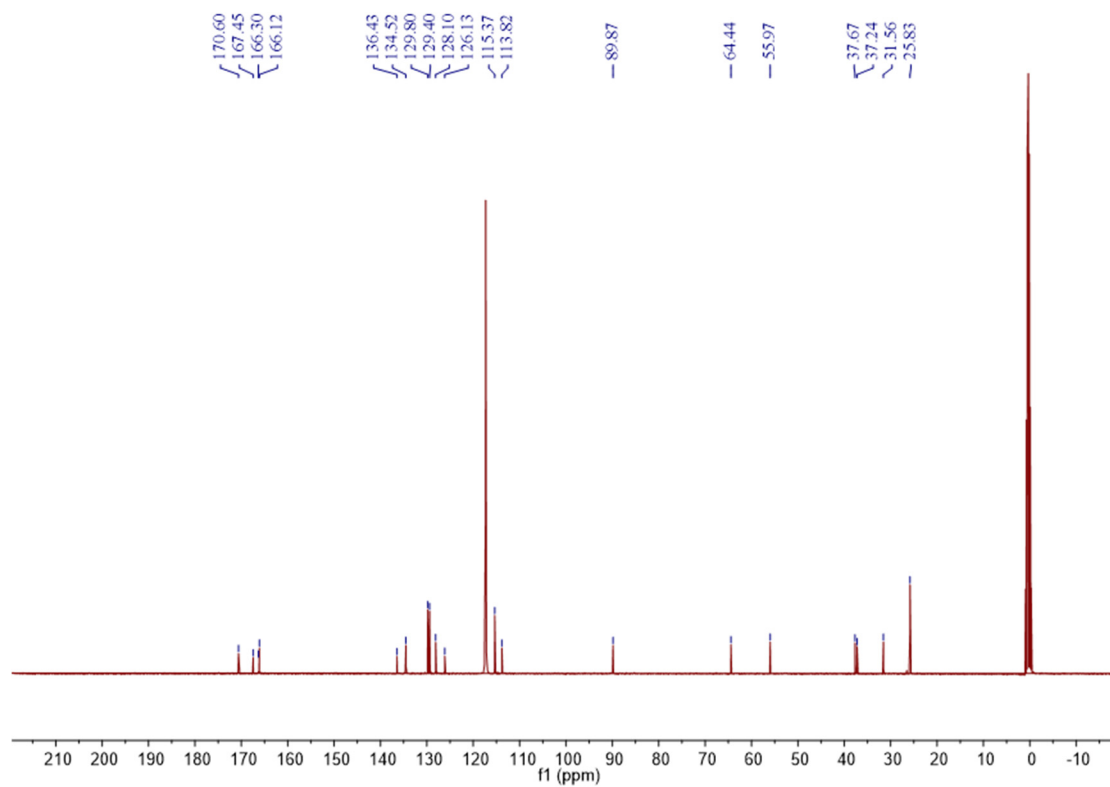

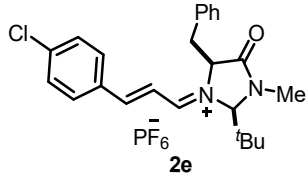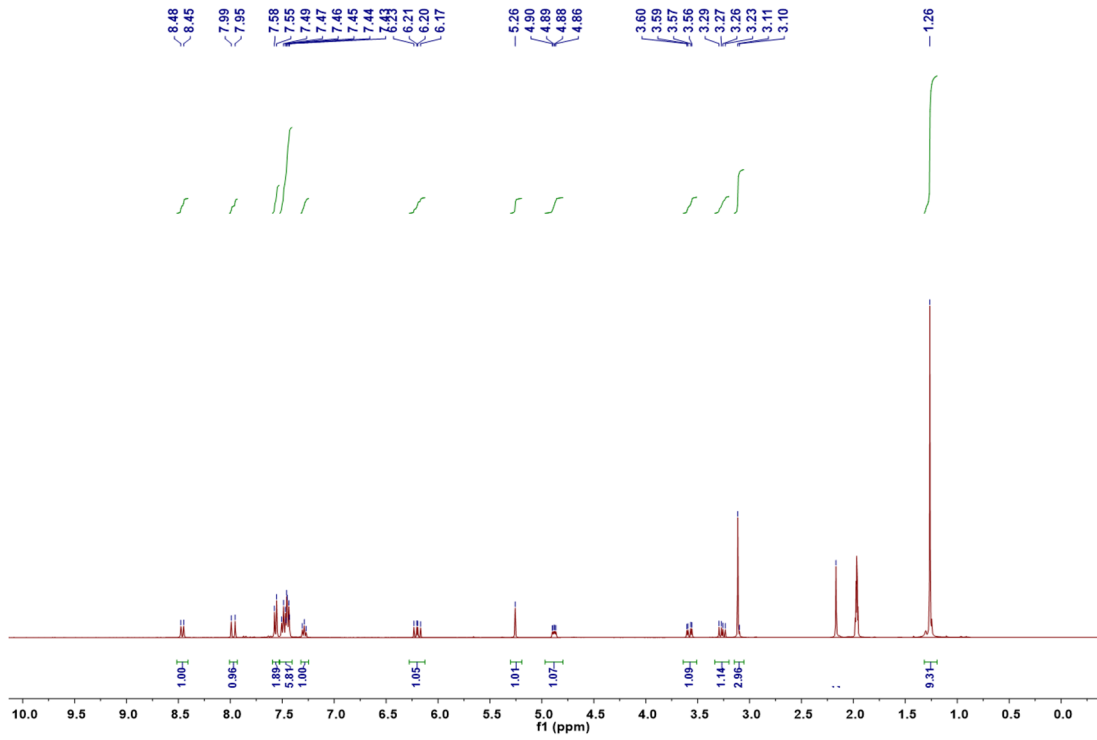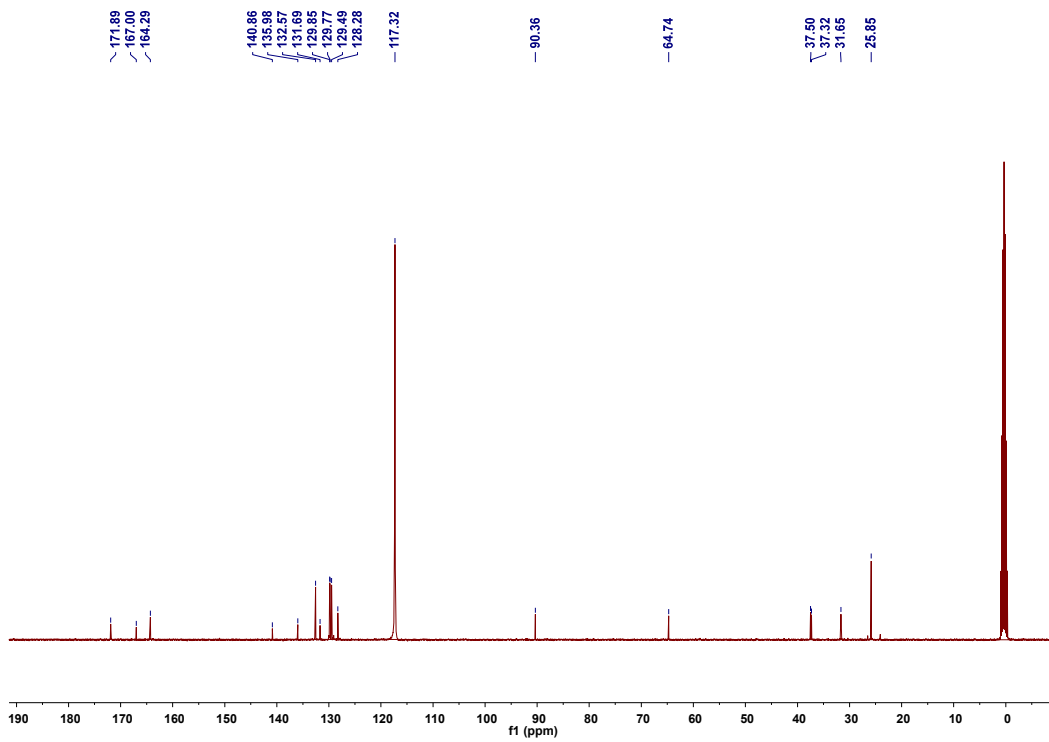

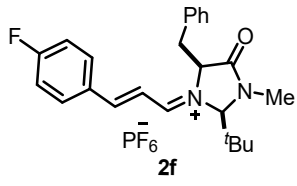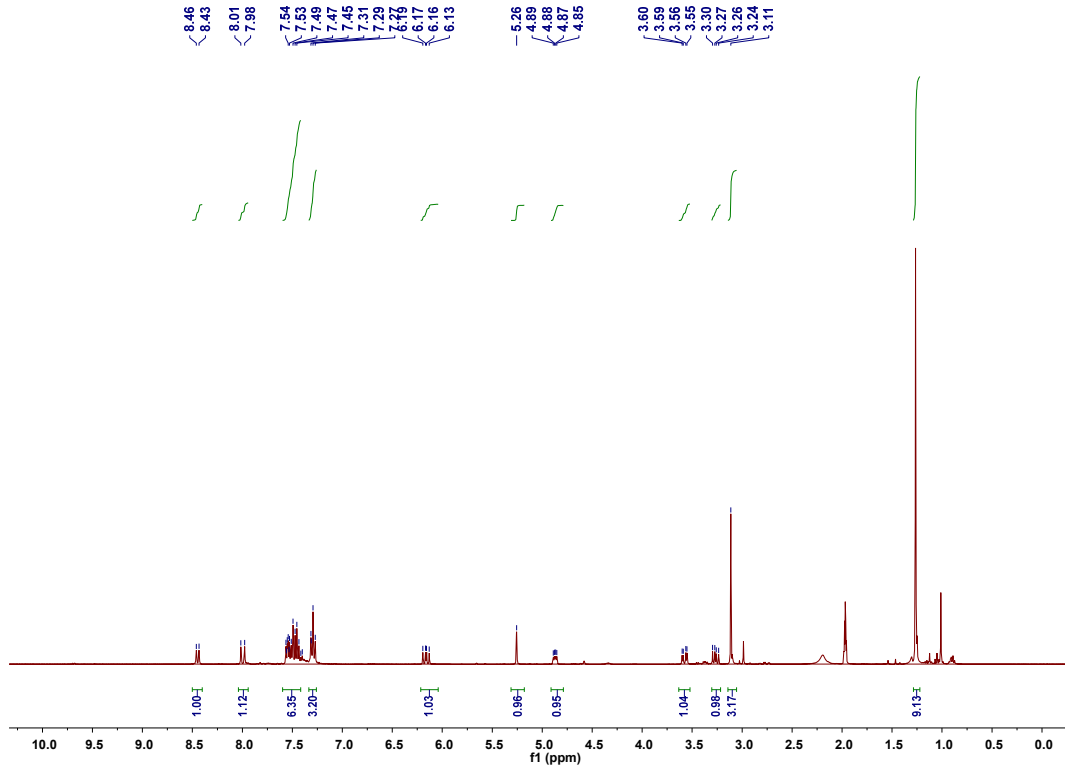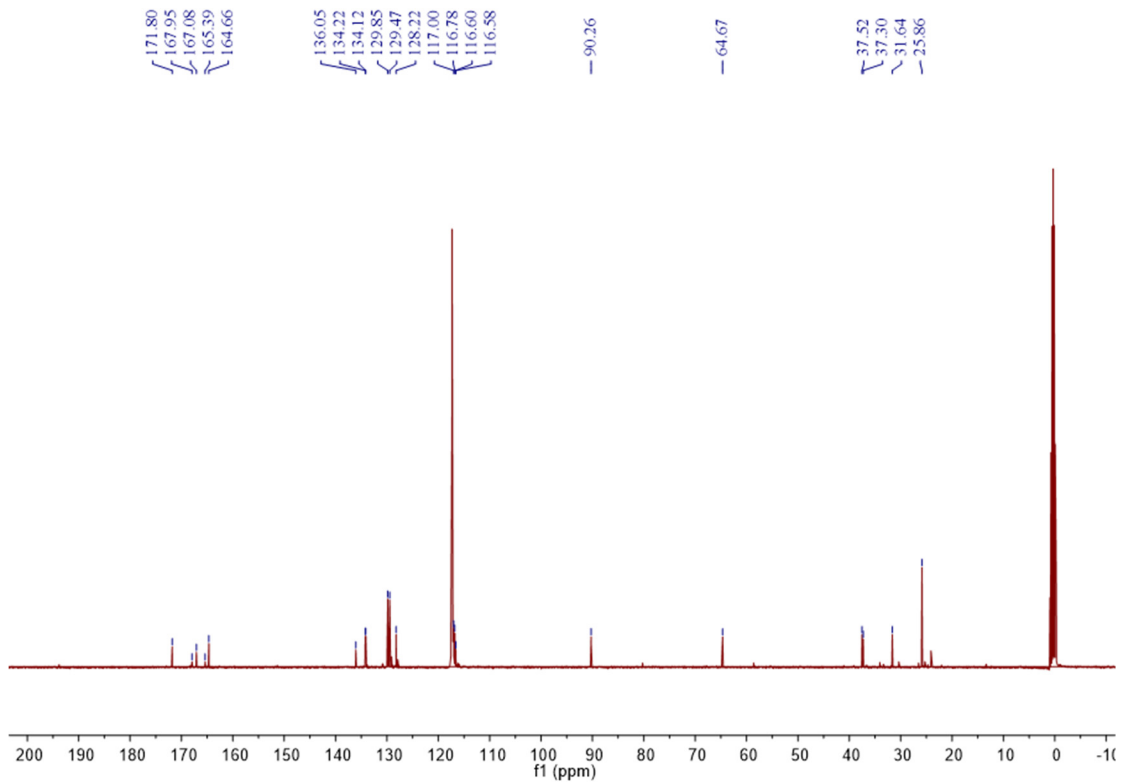



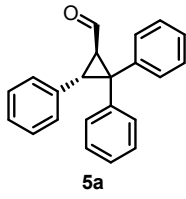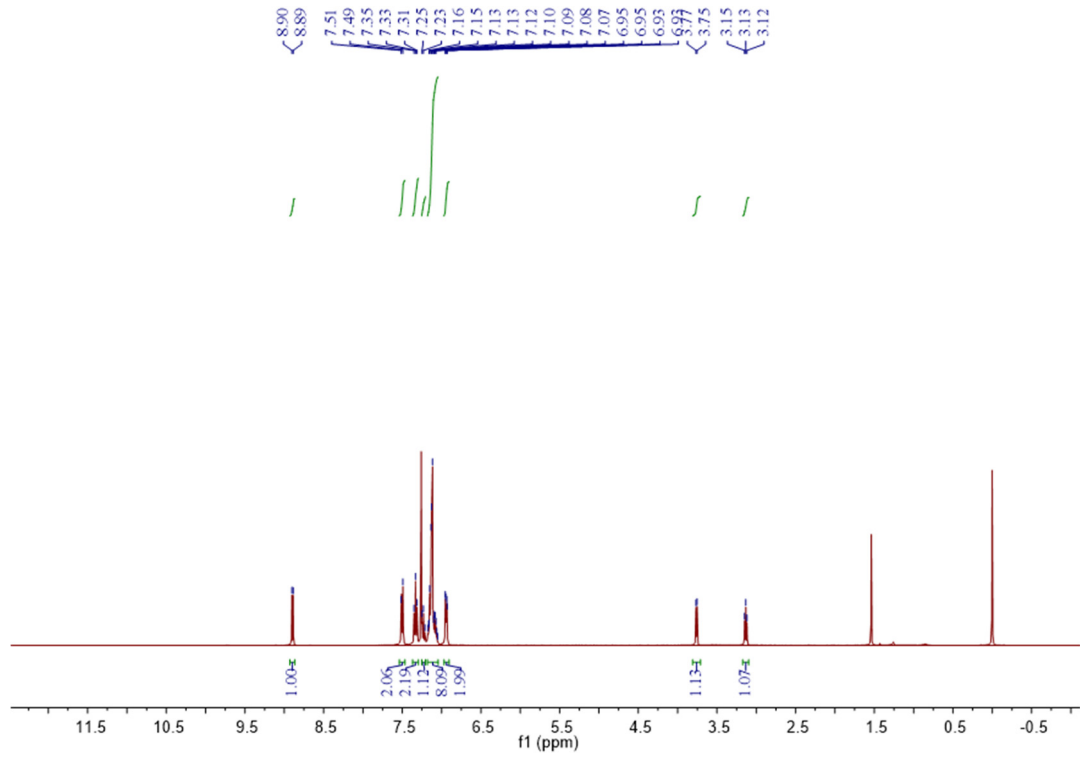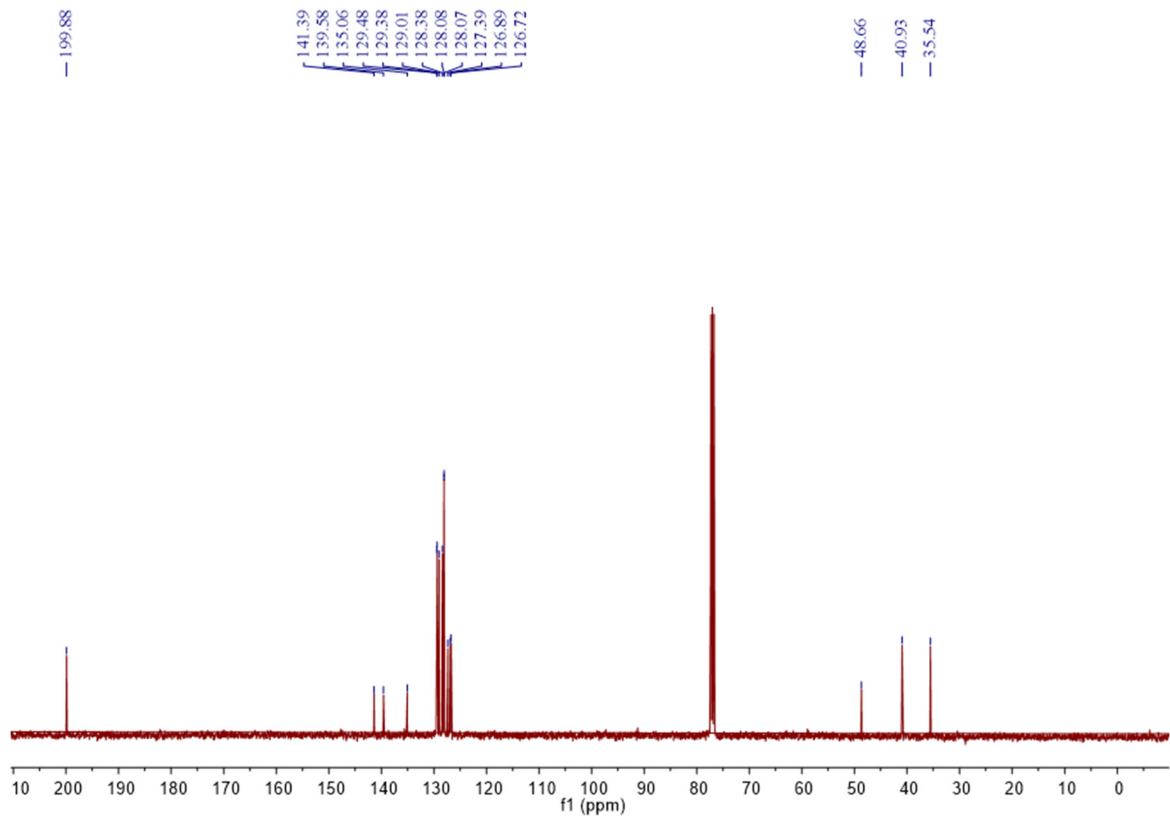

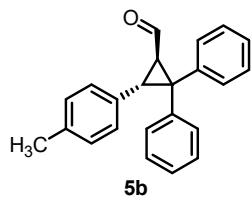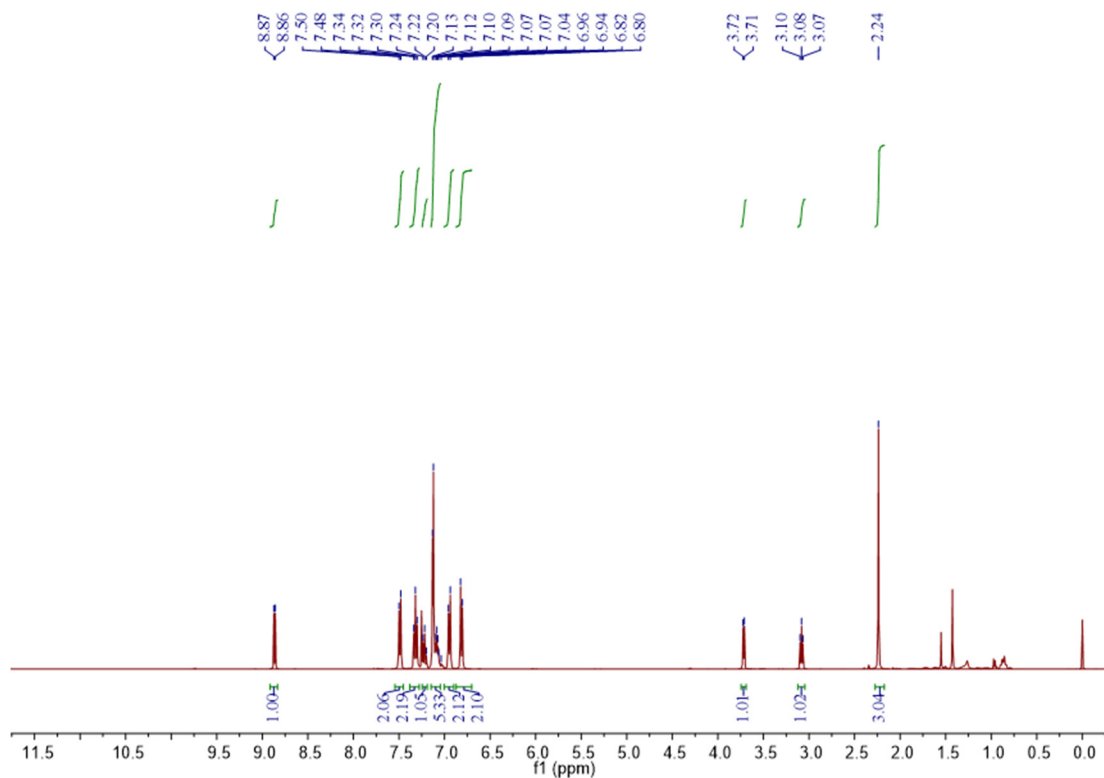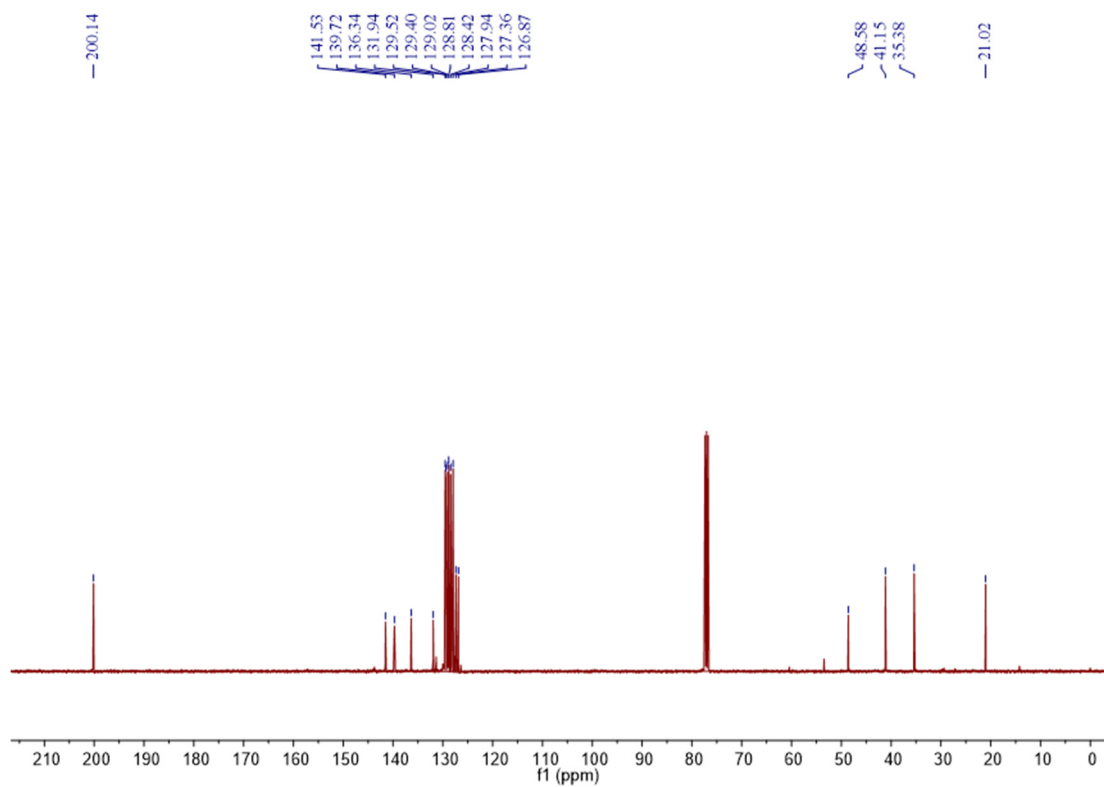

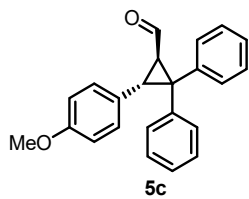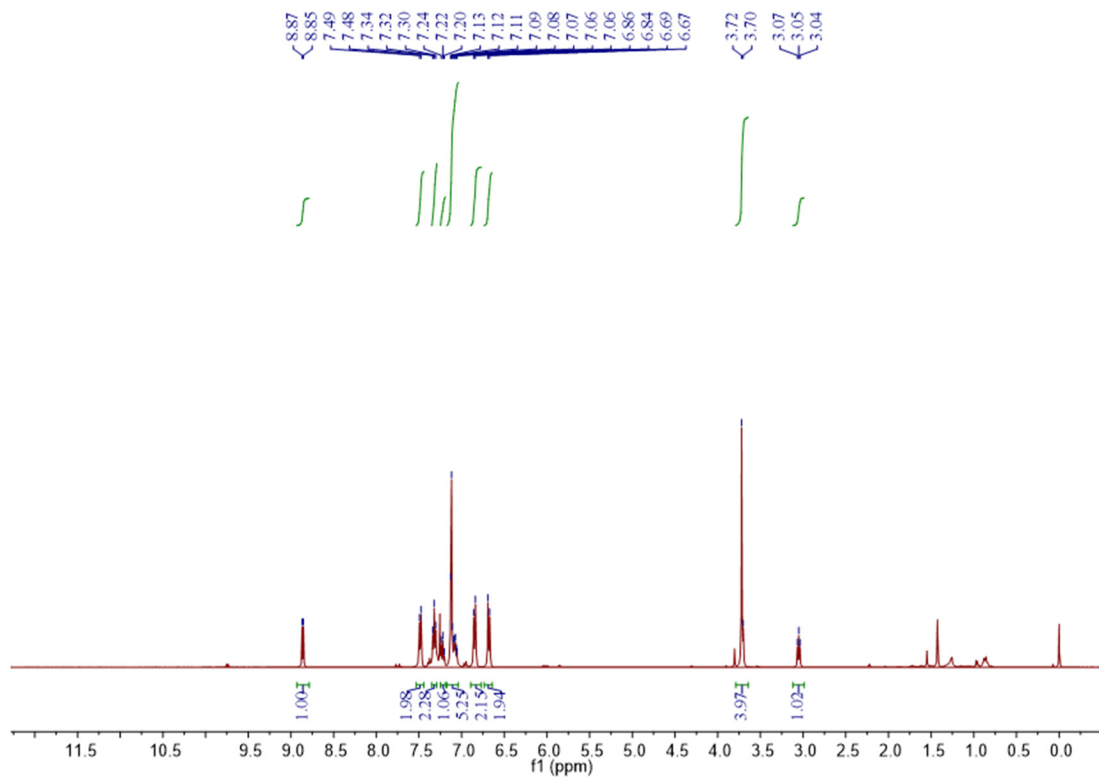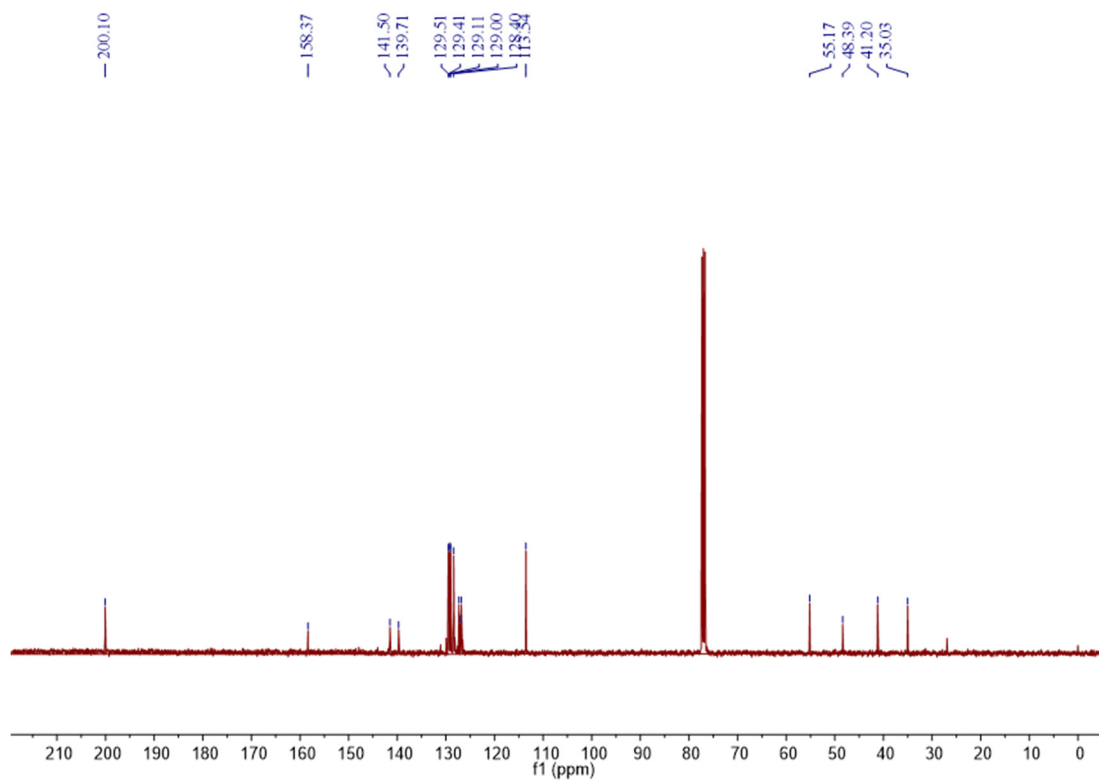

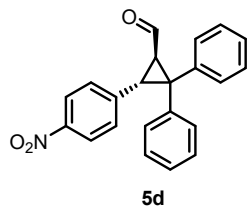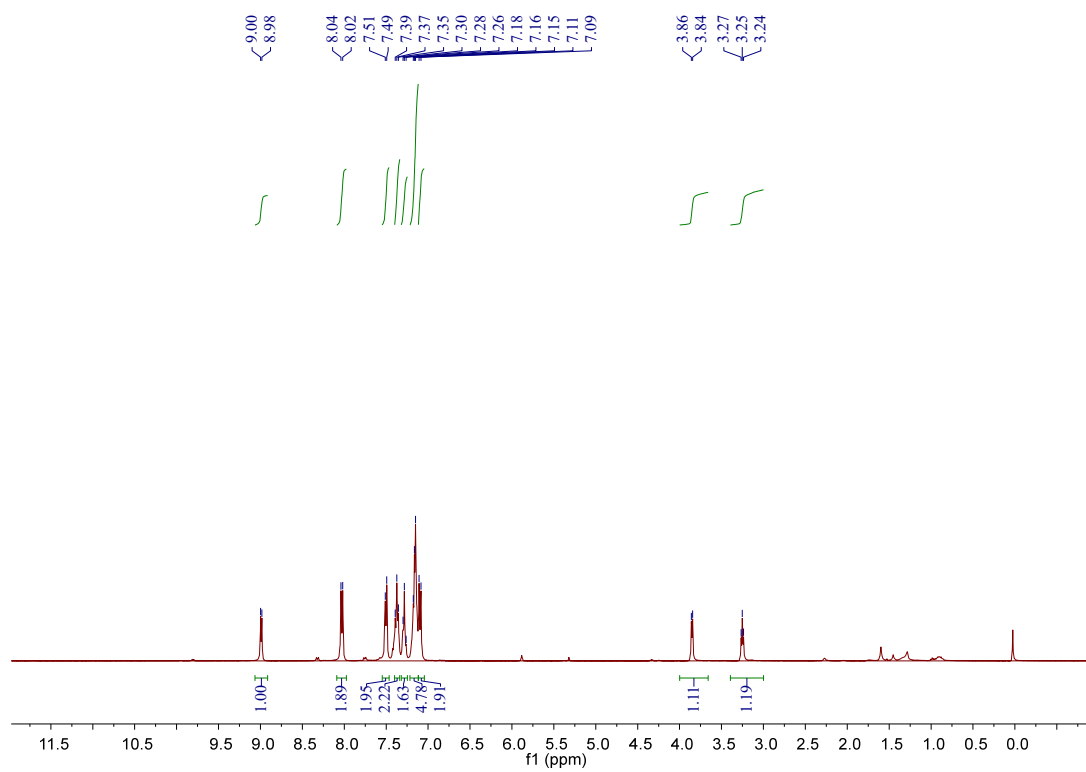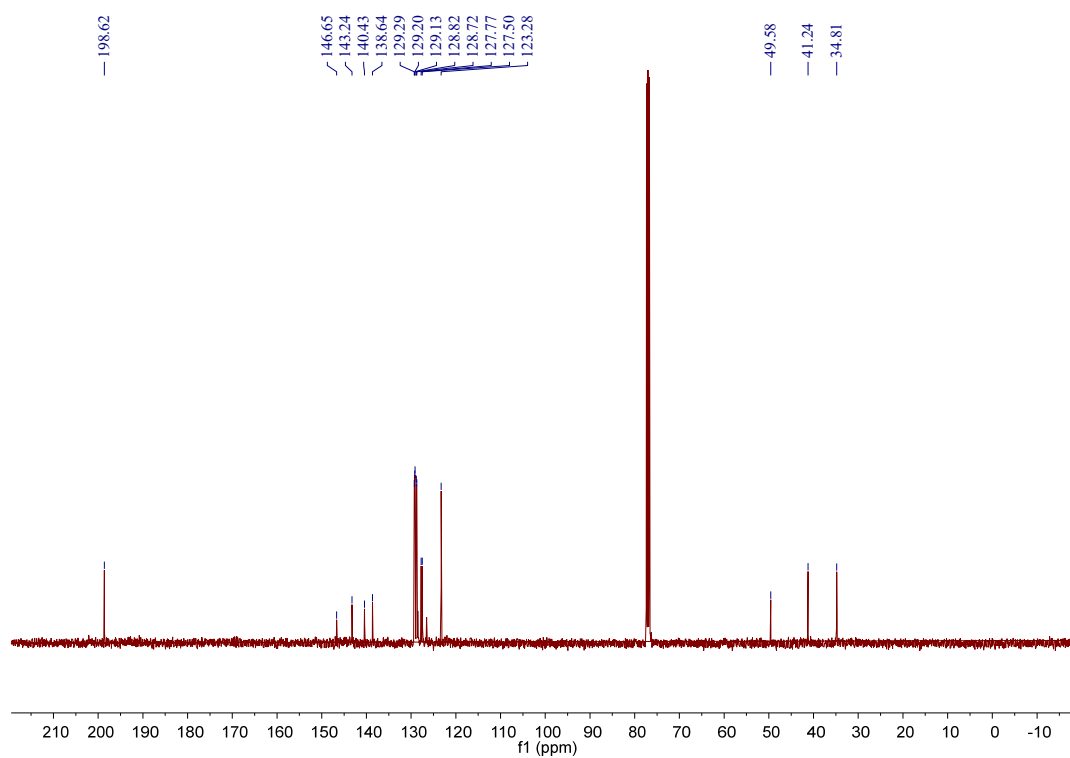

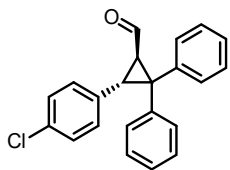

5e

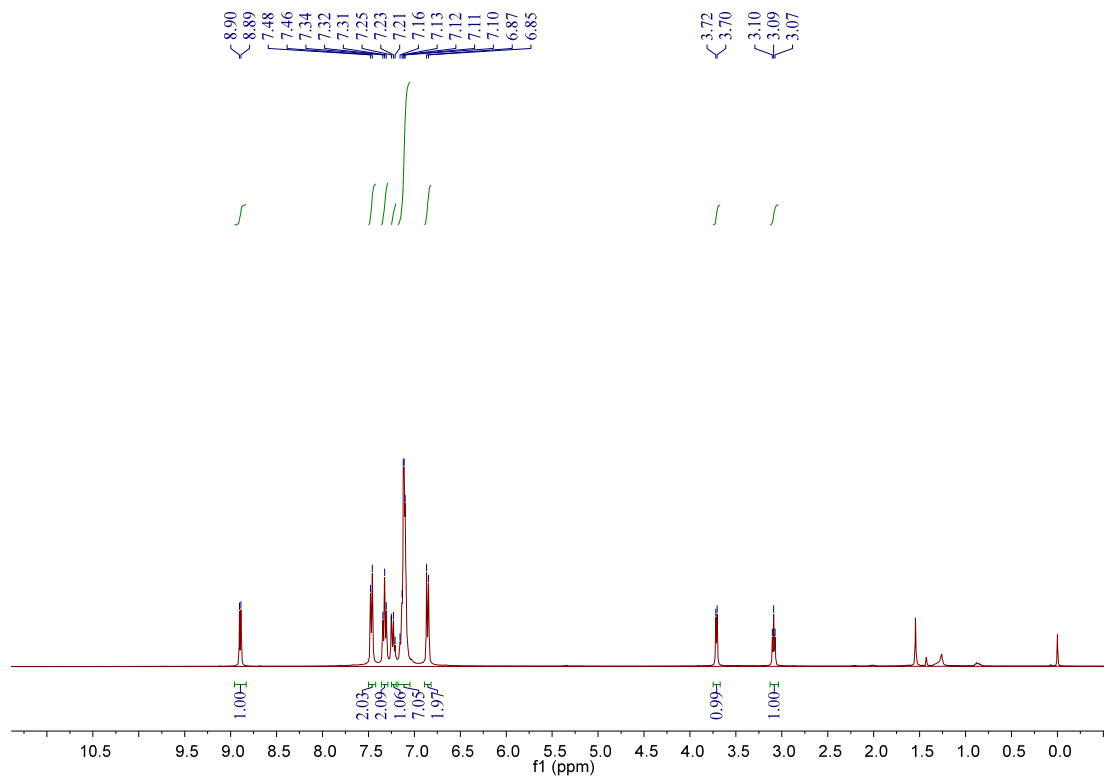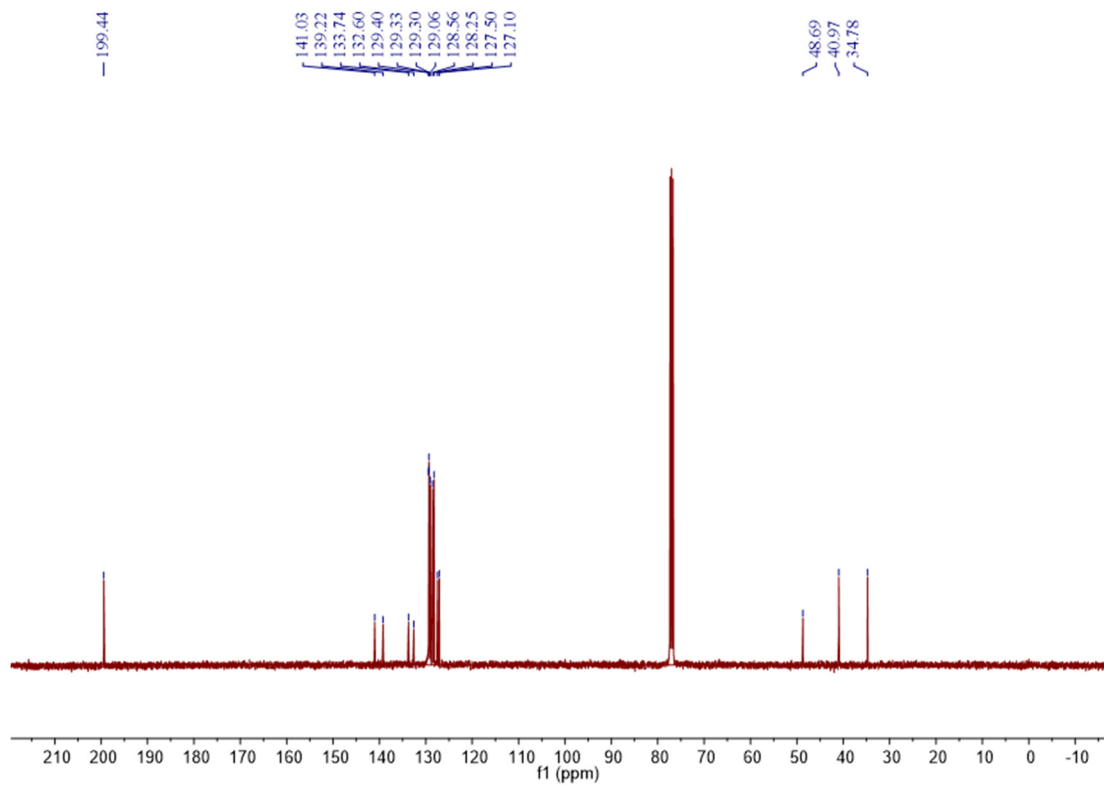

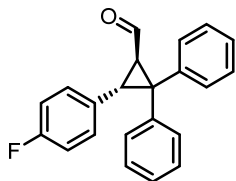

5f

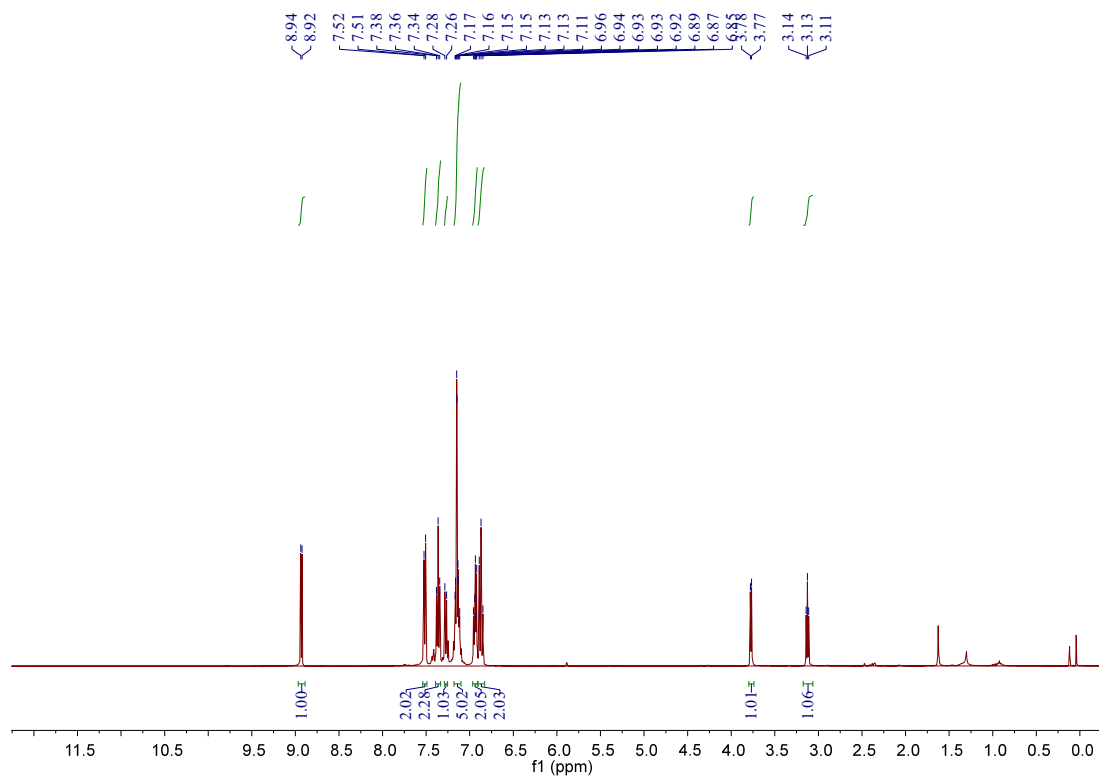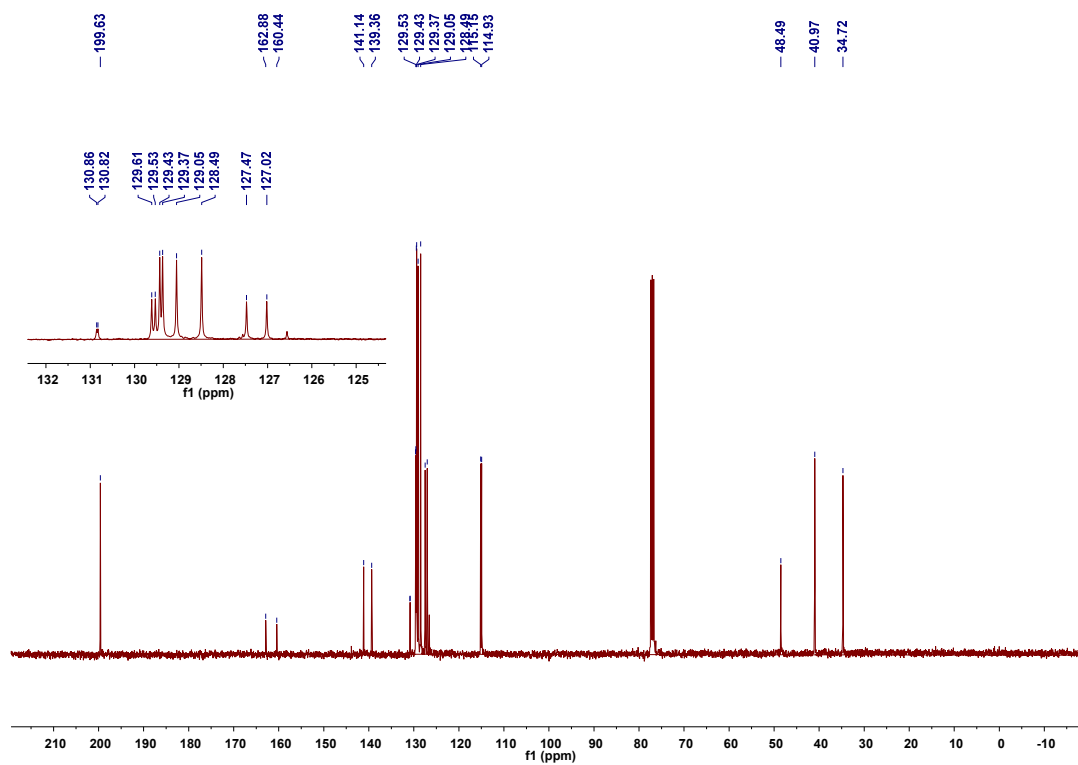

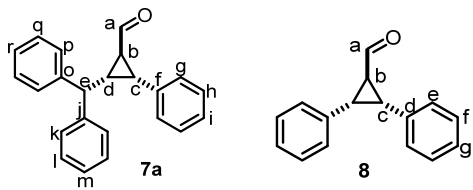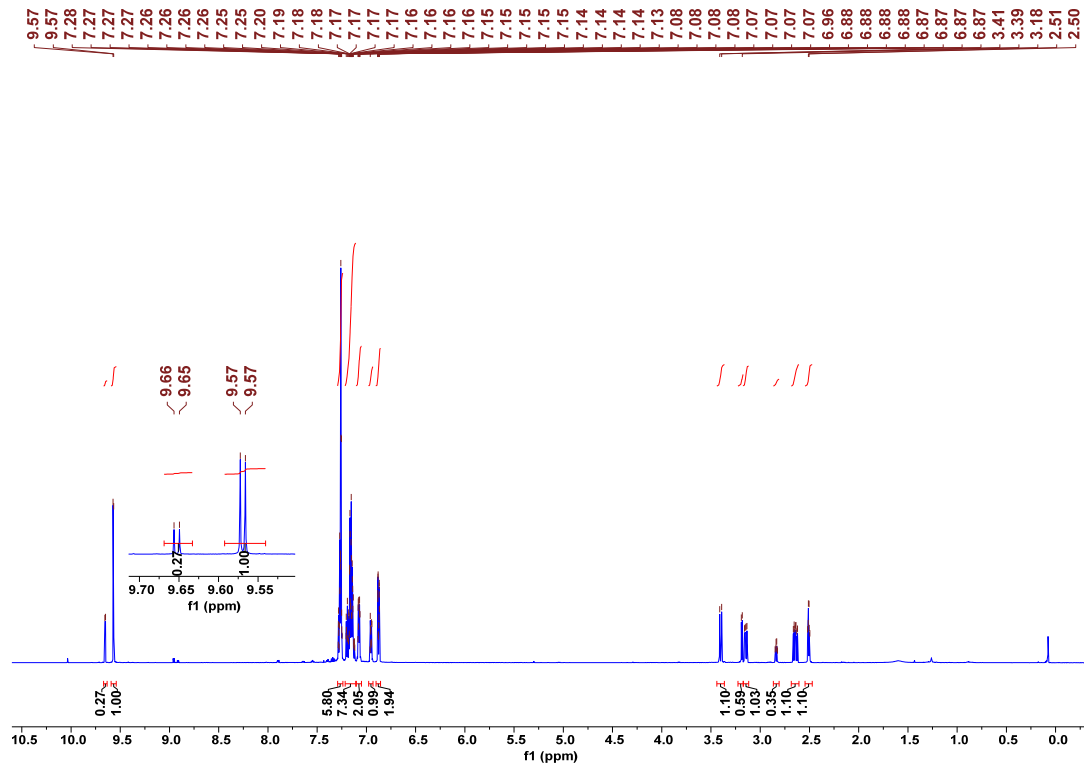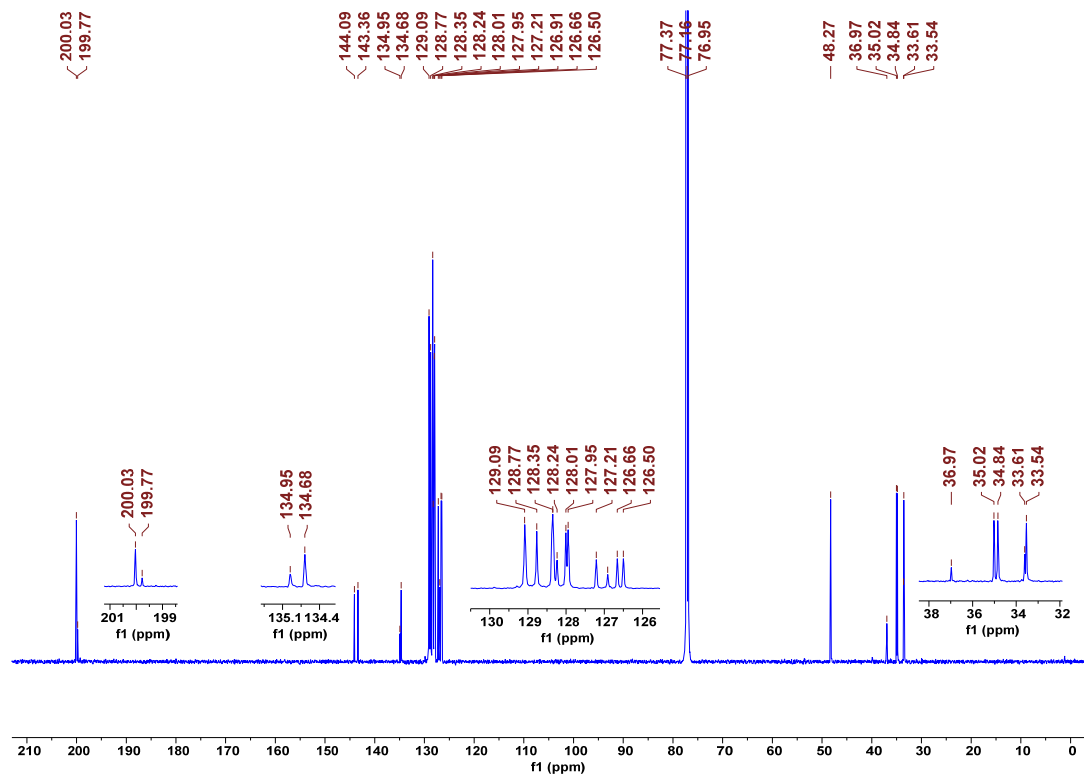

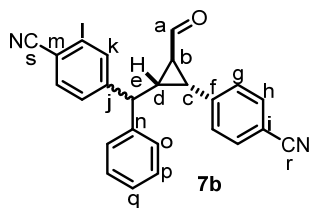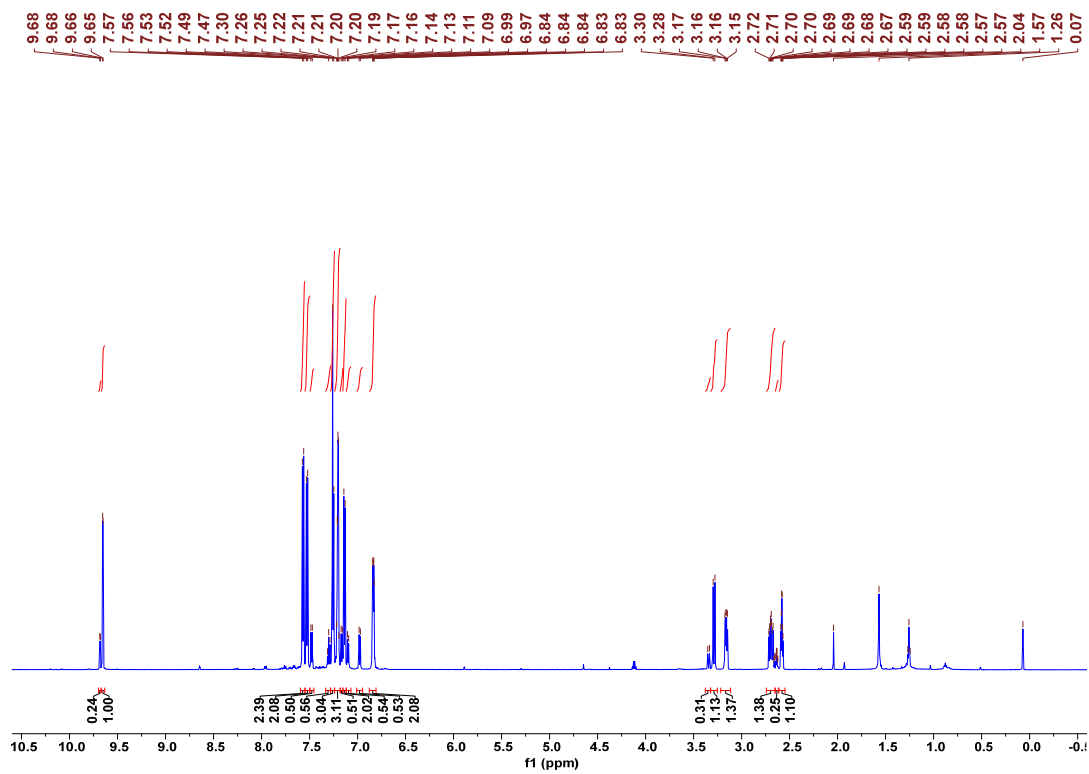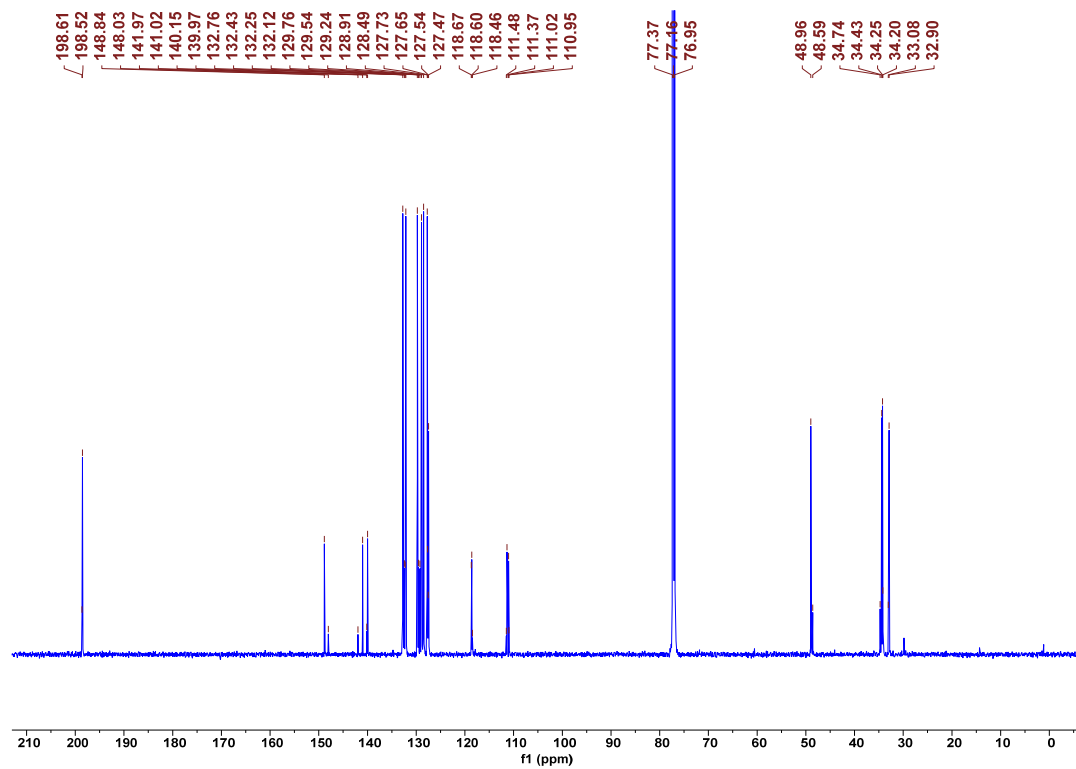



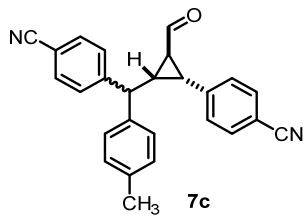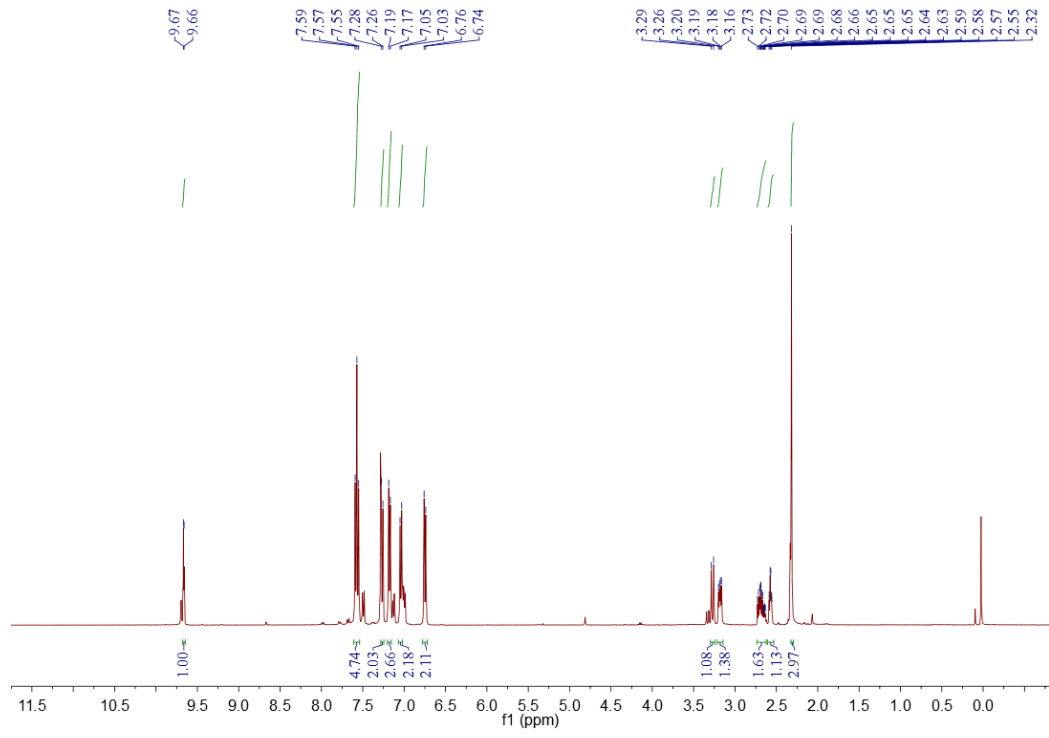



## 12. Crystallographic Data

The crystal structure of **5c** could be obtained by the volatilization of solution of **5c** in hexane at ambient temperature. Crystallographic data for **5c** including cif file have been deposited with the Cambridge Crystallographic Data Centre with the numbers of 1963170. Copies of these data can be requested from, free of charge, the CCDC website at <https://www.ccdc.cam.ac.uk/structures/>.

Crystallographic data for **5c**:

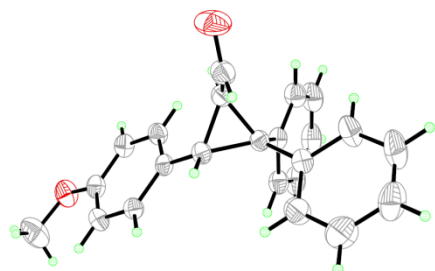

|                                           |                                                |
|-------------------------------------------|------------------------------------------------|
| net formula                               | C <sub>23</sub> H <sub>20</sub> O <sub>2</sub> |
| <i>M<sub>r</sub></i> /g mol <sup>-1</sup> | 328.39                                         |
| crystal size/mm                           | 0.2 × 0.05 × 0.02                              |
| <i>T</i> /K                               | 293(2)                                         |
| radiation                                 | CuKα                                           |
| diffractometer                            | 'SuperNova, Dual, Cu at home/near, AtlasS2'    |
| crystal system                            | monoclinic                                     |
| space group                               | 'I 2'                                          |
| <i>a</i> /Å                               | 13.7279(7)                                     |
| <i>b</i> /Å                               | 6.5640(4)                                      |
| <i>c</i> /Å                               | 20.4444(11)                                    |
| α/°                                       | 90                                             |
| β/°                                       | 93.440(5)                                      |
| γ/°                                       | 90                                             |
| <i>V</i> /Å <sup>3</sup>                  | 1838.92(18)                                    |
| <i>Z</i>                                  | 4                                              |
| calc. density/g cm <sup>-3</sup>          | 1.186                                          |
| μ/mm <sup>-1</sup>                        | 0.585                                          |
| absorption correction                     | Multi-Scan                                     |
| transmission factor range                 | N/A                                            |
| refls. measured                           | 4025                                           |
| <i>R</i> <sub>int</sub>                   | 0.0237                                         |
| mean σ( <i>I</i> )/  <i>I</i>             | 0.0359                                         |
| θ range                                   | 3.776–76.677                                   |
| observed refls.                           | 2954                                           |
| <i>x</i> , <i>y</i> (weighting scheme)    | 0.048, 0.000                                   |
| hydrogen refinement                       | C-H: constr                                    |

|                                        |         |
|----------------------------------------|---------|
| Flack parameter                        | 0.0 (3) |
| refls in refinement                    | 2954    |
| parameters                             | 228     |
| restraints                             | 1       |
| $R(F_{\text{obs}})$                    | 0.0374  |
| $R_w(F^2)$                             | 0.1030  |
| S                                      | 1.033   |
| shift/error <sub>max</sub>             | 0.000   |
| max electron density/e Å <sup>-3</sup> | 0.099   |
| min electron density/e Å <sup>-3</sup> | -0.113  |

Formula: C<sub>23</sub>H<sub>20</sub>O<sub>2</sub>.

The crystal structure of **9** could be obtained by the diffusion of THF to the EtOH solution of **9** at ambient temperature. Crystallographic data for **9** including cif file have been deposited with the Cambridge Crystallographic Data Centre with the numbers of 1964337. Copies of these data can be requested from, free of charge, the CCDC website at <https://www.ccdc.cam.ac.uk/structures/>.

Crystallographic data for **9**:

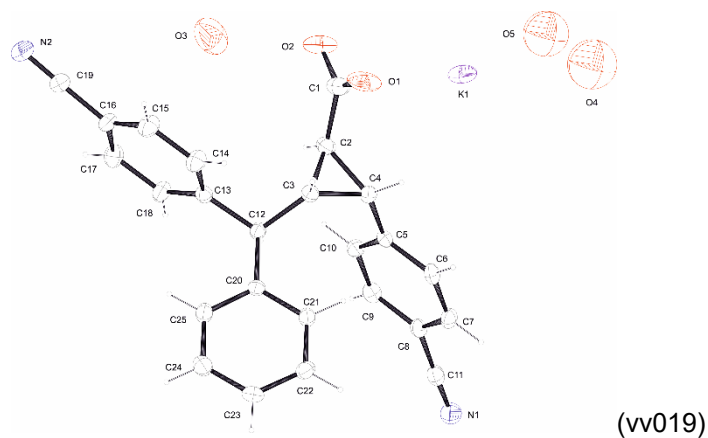

|                   |                                                                   |
|-------------------|-------------------------------------------------------------------|
| net formula       | C <sub>25</sub> H <sub>20</sub> KN <sub>2</sub> O <sub>3.50</sub> |
| $M_r/g\ mol^{-1}$ | 443.53                                                            |
| crystal size/mm   | 0.100 × 0.060 × 0.030                                             |
| $T/K$             | 100.(2)                                                           |
| radiation         | MoK $\alpha$                                                      |
| diffractometer    | 'Bruker D8 Venture TXS'                                           |
| crystal system    | monoclinic                                                        |
| space group       | 'P 1 21 1'                                                        |
| $a/\text{Å}$      | 10.0045(3)                                                        |
| $b/\text{Å}$      | 6.0051(2)                                                         |
| $c/\text{Å}$      | 19.7363(5)                                                        |

|                                          |                                     |
|------------------------------------------|-------------------------------------|
| $\alpha/^\circ$                          | 90                                  |
| $\beta/^\circ$                           | 97.1210(10)                         |
| $\gamma/^\circ$                          | 90                                  |
| $V/\text{\AA}^3$                         | 1176.57(6)                          |
| $Z$                                      | 2                                   |
| calc. density/g cm <sup>-3</sup>         | 1.252                               |
| $\mu/\text{mm}^{-1}$                     | 0.255                               |
| absorption correction                    | Multi-Scan                          |
| transmission factor range                | 0.6704–0.7454                       |
| refls. measured                          | 9838                                |
| $R_{\text{int}}$                         | 0.0258                              |
| mean $\sigma(I)/I$                       | 0.0460                              |
| $\theta$ range                           | 3.516–26.371                        |
| observed refls.                          | 4242                                |
| $x, y$ (weighting scheme)                | 0.1032, 0.4254                      |
| hydrogen refinement                      | C-H: constr, O-H: not<br>considered |
| Flack parameter                          | 0.020(19)                           |
| refls in refinement                      | 4796                                |
| parameters                               | 288                                 |
| restraints                               | 1                                   |
| $R(F_{\text{obs}})$                      | 0.0539                              |
| $R_w(F^2)$                               | 0.1615                              |
| $S$                                      | 1.057                               |
| shift/error <sub>max</sub>               | 0.001                               |
| max electron density/e $\text{\AA}^{-3}$ | 0.786                               |
| min electron density/e $\text{\AA}^{-3}$ | -0.373                              |

Formula:  $\text{KC}_{25}\text{H}_{17}\text{N}_2\text{O}_2 \cdot 1.5 \text{H}_2\text{O}$ . The water content is estimated since their  $\text{sof}$ 's have been fixed to values obtained by free refinement and consideration of acceptable thermal parameters.

### 13. References

---

[S1] (a) K. A. Ahrendt, C. J. Borths, D. W. C. MacMillan, *J. Am. Chem. Soc.* **2000**, *122*, 4243-4244; (b) F. An, S. Paul, J. Ammer, A. R. Ofial, P. Mayer, S. Lakhdar, H. Mayr, *Asian J. Org. Chem.* **2014**, *3*, 550-555; (c) U. Grošelj, A. Beck, W. B. Schweizer, D. Seebach, *Helv. Chim. Acta* **2014**, *97*, 751-796; (d) M. Silvi, C. Verrier, Y. P. Rey, L. Buzzetti, P. Melchiorre, *Nat. Chem.* **2017**, *9*, 868.

[S2] (a) T. Bug, M. Hartnagel, C. Schlierf, H. Mayr, *Chem. Eur. J.* **2003**, *9*, 4068-4076; (b) H. Jangra, Q. Chen, E. Fuks, I. Zenz, P. Mayer, A. R. Ofial, H. Zipse, H. Mayr, *J. Am. Chem. Soc.* **2018**, *140*, 16758-16772.

[S3] B. L. Ryland, S. D. McCann, T. C. Brunold, S. S. Stahl, *J. Am. Chem. Soc.* **2014**, *136*, 12166-12173.

[S4] Harder, E.; Damm, W.; Maple, J.; Wu, C.; Reboul, M.; Xiang, J. Y.; Wang, L.; Lupyan, D.; Dahlgren, M. K.; Knight, J.L.; Kaus, J. W.; Cerutti, D. S.; Krilov, G.; Jorgensen, W. L.; Abel, R.; Friesner, R. A. *J. Chem. Theory Comput.* **2016**, *12*, 281-296.

[S5] Schrödinger Release 2019-4: MacroModel, Schrödinger, LLC, New York, NY, 2019.

[S6] Gaussian 16, Revision A.03, Frisch, M. J.; Trucks, G. W.; Schlegel, H. B.; Scuseria, G. E.; Robb, M. A.; Cheeseman, J. R.; Scalmani, G.; Barone, V.; Petersson, G. A.; Nakatsuji, H.; Li, X.; Caricato, M.; Marenich, A. V.; Bloino, J.; Janesko, B. G.; Gomperts, R.; Mennucci, B.; Hratchian, H. P.; Ortiz, J. V.; Izmaylov, A. F.; Sonnenberg, J. L.; Williams-Young, D.; Ding, F.; Lipparini, F.; Egidi, F.; Goings, J.; Peng, B.; Petrone, A.; Henderson, T.; Ranasinghe, D.; Zakrzewski, V. G.; Gao, J.; Rega, N.; Zheng, G.; Liang, W.; Hada, M.; Ehara, M.; Toyota, K.; Fukuda, R.; Hasegawa, J.; Ishida, M.; Nakajima, T.; Honda, Y.; Kitao, O.; Nakai, H.; Vreven, T.; Throssell, K.; Montgomery, J. A., Jr.; Peralta, J. E.; Ogliaro, F.; Bearpark, M. J.; Heyd, J. J.; Brothers, E. N.; Kudin, K. N.; Staroverov, V. N.; Keith, T. A.; Kobayashi, R.; Normand, J.; Raghavachari, K.; Rendell, A. P.; Burant, J. C.; Iyengar, S. S.; Tomasi, J.; Cossi, M.; Millam, J. M.; Klene, M.; Adamo, C.; Cammi, R.; Ochterski, J. W.; Martin, R. L.; Morokuma, K.; Farkas, O.; Foresman, J. B.; Fox, D. J. Gaussian, Inc., Wallingford CT, 2016.

[S7] a) Becke, A. D. *J. Chem. Phys.* **1993**, *98*, 5648-5652; b) F. Weigend, R. Ahlrichs, *Phys. Chem. Chem. Phys.* **2005**, *7*, 3297-3305.

[S8] A. V. Marenich, C. J. Cramer, D. G. Truhlar, *J. Phys. Chem. B* **2009**, *113*, 6378-6396.

[S9] S. Grimme, S. Ehrlich, L. Goerigk, *J. Comput. Chem.* **2011**, *32*, 1456-1465.
